# Supplementary material for: Heterotrimetallic {LnOVPt} complexes with antiferromagnetic Ln–V coupling and magnetic memory
Source: Royal Society of Chemistry journal article supplement (doi:10.1039/d0cc04334f), 2020-01-01
Supplement: d0cc04334f1.pdf [file d0cc04334f1.pdf]

## Electronic Supplementary Information

For

### Heterotrimetallic {LnOVPt} complexes with Antiferromagnetic Ln-V Coupling and Magnetic Memory

Stephanie A. Beach,<sup>a</sup> Jesse L. Guillet,<sup>a</sup> Sydney L. Lagueux,<sup>a</sup> Mauro Perfetti,<sup>b</sup> Brooke N. Livesay,<sup>c</sup> Matthew P. Shores,<sup>c</sup> Jeffrey W. Bacon,<sup>a</sup> Arnold L. Rheingold,<sup>d</sup> Polly L. Arnold,<sup>e</sup> Linda H. Doerrer,<sup>\*a</sup>

<sup>a</sup> Boston University, 590 Commonwealth Ave, Boston, MA 02215.

<sup>b</sup> Department of Chemistry, Universitetsparken 5, 2100 Copenhagen.

<sup>c</sup> Department of Chemistry, Colorado State University, 1301 Center Ave Chemistry B101, Fort Collins, CO 80523

<sup>d</sup> University of California San Diego Dept. of Chemistry and Small Molecule Xray Crystallography, 5128 Urey Hall Mc 0358, La Jolla, CA 92093.

<sup>e</sup> University of Edinburgh Joseph Black Building, David Brewster Road, Edinburgh, UK EH9 3FJ

## Table of Contents:

|                   | Title                                                                         | Page   |
|-------------------|-------------------------------------------------------------------------------|--------|
|                   | Experimental Procedures                                                       | 3-6    |
| <b>Figure S1</b>  | ORTEP of <b>1</b>                                                             | 8      |
| <b>Figure S2</b>  | ORTEP of <b>2</b>                                                             | 9      |
| <b>Figure S3</b>  | ORTEP of <b>2</b> inter-lantern contacts                                      | 10     |
| <b>Figure S4</b>  | Temperature dependent magnetic susceptibility of <b>1</b>                     | 11     |
| <b>Figure S5</b>  | Temperature dependence of $1/\chi$ for <b>1</b>                               | 12     |
| <b>Figure S6</b>  | Temperature dependence of $\chi$ at 10-50 kOe of <b>1</b>                     | 13     |
| <b>Figure S7</b>  | Field dependence of magnetization of <b>1</b>                                 | 14     |
| <b>Figure S8</b>  | Temperature dependence of $\chi$ for <b>1</b>                                 | 15     |
| <b>Figure S9</b>  | Temperature dependent magnetic susceptibility of <b>1</b>                     | 16     |
|                   | Note on magnetic data interpretation for <b>1</b>                             | 16     |
| <b>Figure S10</b> | IR spectra of <b>1</b> and <b>2</b>                                           | 18     |
| <b>Figure S11</b> | IR spectra of <b>1</b> , <b>3Ce</b> , and <b>3Nd</b>                          | 19     |
| <b>Figure S12</b> | IR spectra of <b>2</b> , <b>4Ce</b> , and <b>4Nd</b>                          | 20     |
| <b>Figure S13</b> | UV-vis spectra of <b>1-2</b>                                                  | 21     |
| <b>Figure S14</b> | UV-vis spectrum of <b>3Nd</b>                                                 | 22     |
| <b>Figure S15</b> | UV-vis spectrum of <b>4Nd</b>                                                 | 23     |
| <b>Figure S16</b> | UV-vis spectrum of <b>3Ce</b>                                                 | 24     |
| <b>Figure S17</b> | UV-vis spectrum of <b>4Ce</b>                                                 | 25     |
| <b>Figure S18</b> | M vs H magnetization curves of <b>3Ln-4Ln</b>                                 | 26     |
| <b>Figure S19</b> | M vs B/T curves for <b>3Ln-4Ln</b>                                            | 27     |
| <b>Figure S20</b> | AC susceptibility measurements for <b>3Ce</b> and <b>3Nd</b>                  | 28     |
| <b>Figure S21</b> | ORTEP of <b>4Ce</b>                                                           | 29     |
| <b>Figure S22</b> | ORTEP of <b>3Nd</b>                                                           | 30     |
| <b>Figure S23</b> | ORTEP of <b>4Nd</b>                                                           | 31     |
| <b>Table S1</b>   | Select interatomic distances (Å) and angles (°) for <b>1-2</b>                | 32     |
| <b>Table S2</b>   | Summary of X-ray crystallographic collection parameters<br><b>1,2,3Ln-4Ln</b> | 33     |
| <b>Table S3</b>   | All non-hydrogen bond distances (Å) of <b>1</b>                               | 34     |
| <b>Table S4</b>   | All non-hydrogen bond angles (°) of <b>1</b>                                  | 35-36  |
| <b>Table S5</b>   | All non-hydrogen bond distances (Å) of <b>2</b>                               | 37-38  |
| <b>Table S6</b>   | All non-hydrogen bond angles (°) of <b>2</b>                                  | 39-41  |
| <b>Table S7</b>   | All non-hydrogen bond distances (Å) of <b>3Ce</b>                             | 42-45  |
| <b>Table S8</b>   | All non-hydrogen bond angles (°) of <b>3Ce</b>                                | 46-51  |
| <b>Table S9</b>   | All non-hydrogen bond distances (Å) of <b>4Ce</b>                             | 52-59  |
| <b>Table S10</b>  | All non-hydrogen bond angles (°) of <b>4Ce</b>                                | 60-72  |
| <b>Table S11</b>  | All non-hydrogen bond distances (Å) of <b>3Nd</b>                             | 73-75  |
| <b>Table S12</b>  | All non-hydrogen bond angles (°) of <b>3Nd</b>                                | 76-80  |
| <b>Table S13</b>  | All non-hydrogen bond distances (Å) of <b>4Nd</b>                             | 81-88  |
| <b>Table S14</b>  | All non-hydrogen bond angles (°) of <b>4Nd</b>                                | 89-102 |

## Experimental Details

### *Materials and Methods*

The starting complexes Ln(ODtbp)<sub>3</sub> (Ln=Ce,<sup>1</sup> Nd<sup>2</sup>) were prepared by previously reported methods. Potassium tetrachloroplatinate (K<sub>2</sub>PtCl<sub>4</sub>) was prepared by the same method as previously published.<sup>3</sup> All moisture and air sensitive materials were manipulated in dinitrogen filled MBraun gloveboxes. All glassware was dried in a 160 °C oven overnight, cooled under vacuum and purged with nitrogen before use. Toluene, pentane, hexamethyldisiloxane, and hexane were collected from a Vac Atmospheres solvent purification system, degassed and stored over activated 4 Å molecular sieves under dinitrogen. Prior to collection the solvent was cycled over a drying column containing molecular sieves for 12 hours. Toluene-d<sub>8</sub> was degassed, stirred over potassium for 24 hours and distilled by trap to trap distillation under static vacuum prior to use. CD<sub>2</sub>Cl<sub>2</sub> was degassed and stirred over CaH<sub>2</sub> for 24 hours and distilled by trap to trap distillation under static vacuum prior to use. All other reagents were obtained commercially and used without further purification. Elemental analyses were performed by Atlantic Microlab Inc. (Norcross, GA). UV-vis-NIR spectra were measured with a Shimadzu UV-3600 spectrometer. <sup>1</sup>H-NMR spectral measurements for Evans method<sup>4,5</sup> susceptibility measurements were recorded on a Varian 500 MHz spectrometer (**1-2** at Boston University) and a Bruker 500 MHz spectrometer (**3Ln-4Ln** at University of Edinburgh). Solutions were prepared with CD<sub>2</sub>Cl<sub>2</sub> doped with tetramethylsilane, and the change in <sup>1</sup>H chemical shift was measured for both the protio solvent and the CH<sub>3</sub> protons of the tetramethylsilane. IR spectra were collected with a Nicolet FT-IR with an ATR attachment inside a dinitrogen filled MBraun glovebox.

### *Synthetic Procedures*

**[Pt(V=O)(SOCMe)<sub>4</sub>] (1).** A portion of NaHCO<sub>3</sub> (170.9 mg, 2.03 mmol) was dissolved in approximately 10 mL H<sub>2</sub>O, and to that solution thioacetic acid (HSOCMe) (136.0 μL, 1.92 mmol) was added. These were allowed to react for 20 minutes until bubbles of CO<sub>2</sub> stopped forming. Separately, K<sub>2</sub>PtCl<sub>4</sub> (202.4 mg, 0.482 mmol) was dissolved in minimum H<sub>2</sub>O (2 mL) and added, yielding a light pink solution. This mixture was then allowed to react overnight, resulting in a

yellow solution.  $\text{VOSO}_4$  (82.4 mg, 0.482 mmol) was dissolved in minimum  $\text{H}_2\text{O}$  (5 mL) and added to the Pt(II) solution, resulting in the immediate formation of a light green precipitate. The reaction was allowed to proceed for 4 h, and the precipitate was recovered by vacuum filtration, followed by extensive washing with  $\text{H}_2\text{O}$  and  $\text{Et}_2\text{O}$ . The precipitate was then dried *in vacuo* overnight, yielding a light green powder (152.8 mg, 56 %). Single crystals suitable for X-ray analysis were grown by layering a saturated solution in  $\text{CHCl}_3$  with hexanes. Anal. Calcd. for  $\text{C}_8\text{H}_{12}\text{O}_5\text{PtS}_5\text{V}$ : C, 17.08; H, 2.15; N, 0.00. Found: C, 17.37; H, 2.21; N, 0.00. UV-vis-NIR ( $\text{CH}_2\text{Cl}_2$ ) ( $\lambda_{\text{max}}$ , nm ( $\epsilon_{\text{M}}$ ,  $\text{cm}^{-1} \text{M}^{-1}$ )): 269 (53,100), 616 (23), 731 (26).  $\mu_{\text{eff}}$  (Evans method,  $\text{CD}_2\text{Cl}_2$ ): 1.68. IR ( $\text{cm}^{-1}$ ): 2886 w, 1547 m, 1483 m, 1423 m, 1358 m, 1349 m, 1341 m, 1279 w, 1241 w, 1145 s, 1012 m, 984 s, 961 s, 841 m, 717 s, 514 s.

**[Pt(V=O)(SOCPh)<sub>4</sub>] (2)**. A portion of potassium thiobenzoate,  $\text{KSOCPh}$  (127.0 mg, 0.722 mmol) was dissolved in approximately 10 mL  $\text{H}_2\text{O}$ . Separately, a portion of  $\text{K}_2\text{PtCl}_4$  (74.6 mg, 0.180 mmol) was dissolved in minimum  $\text{H}_2\text{O}$  (1 mL) and added. The resulting pink solution was allowed to react for 1 h, yielding a yellow color. A portion of  $\text{VOSO}_4$  (29.6 mg, 0.180 mmol) was dissolved in minimum  $\text{H}_2\text{O}$  (2 mL) and added to the Pt(II) solution, resulting in the immediate formation of a light green precipitate. The reaction was allowed to proceed overnight and the solid was recovered by vacuum filtration. The product was washed extensively with  $\text{H}_2\text{O}$  and dried *in vacuo* overnight, yielding a green/yellow powder (106.8 mg, 73 %). Single crystals suitable for X-ray analysis were grown by layering a saturated solution in  $\text{CH}_2\text{Cl}_3$  with hexanes. Anal. Calcd. for  $\text{C}_{29}\text{H}_{22}\text{O}_5\text{Cl}_2\text{PtS}_4\text{V}$ : C, 41.48; H, 2.49; N, 0.00. Found: C, 41.99, H, 2.60; N, 0.00. UV-vis-NIR ( $\text{CH}_2\text{Cl}_2$ ) ( $\lambda_{\text{max}}$ , nm ( $\epsilon_{\text{M}}$ ,  $\text{cm}^{-1} \text{M}^{-1}$ )): 256 (67,200), 302 (62,900), 620 (35), 726 (38).  $\mu_{\text{eff}}$  (Evans method,  $\text{CD}_2\text{Cl}_2$ ): 1.60. IR ( $\text{cm}^{-1}$ ): 3057 w, 1594 w, 1583 w, 1510 s, 1487 s, 1440 m, 1307 m, 1215 s, 1173 s, 1075 w, 989 s, 955 s, 930 m, 846 w, 771 s, 722 s, 681 s, 643 s, 616 m, 582 s, 513 m.

**[Ce(ODtbp)<sub>3</sub>{PtVO(SOCMe)<sub>4</sub>}] (3Ce)**. In a  $\text{N}_2(\text{g})$  filled glovebox,  $\text{Ce(ODtbp)}_3$  (78.0 mg, 0.103 mmol) was dissolved in 2mL of toluene forming a yellow/green solution.  $[\text{PtVO(SOCMe)}_4]$  (58.0 mg, 0.102 mmol) was then added as a solid. As the  $[\text{PtVO(SOCMe)}_4]$  dissolves, there is a color change

to a dark red/brown, translucent solution. After stirring for 24 h at room temperature, the  $[\text{PtVO}(\text{SOCMe})_4]$  has fully dissolved and the solution is a homogenous dark red/brown color with no precipitate formation. The reaction mixture is directly crystallized through slow diffusion of HMDSO into the toluene reaction mixture at room temperature to obtain analytically pure red crystals of the composition  $[\text{Ce}(\text{ODtbp})_3\{\text{PtVO}(\text{SOCMe})_4\}] \cdot \text{tol} \cdot \text{HMDSO}$ . Recrystallized yield: 79.6%. Anal. Calc'd. for  $\text{C}_{50}\text{H}_{75}\text{CeO}_8\text{PtS}_4\text{V}$ : C, 45.55; H, 5.73; N, 0%. Found: C, 45.39; H, 5.85; N, 0%. UV-vis-NIR ( $\text{C}_7\text{H}_8$ ) ( $\lambda_{\text{max}}$ , nm ( $\epsilon\text{M}$ ,  $\text{cm}^{-1}\text{M}^{-1}$ ): 304(30,900), 427(1930), 759 sh(59.6), 904 sh(27.3). IR ( $\text{cm}^{-1}$ ): 2955(br) m, 1533 m, 1403 s, 1240 s, 1160 m, 1093 w, 1000 w, 912 s, 856 s, 818 m. Evans method (toluene- $d_8$ ): 2.2(1).

**$[\text{Ce}(\text{ODtbp})_3\{\text{PtVO}(\text{SOCPh})_4\}]$  (4Ce).** The same procedure as **3Ce** was performed, with  $\text{Ce}(\text{ODtbp})_3$  (96.5 mg, 0.128 mmol) and  $[\text{PtVO}(\text{SOCPh})_4]$  (103.4 mg, 0.128 mmol). Red crystals of the composition  $[\text{Ce}(\text{ODtbp})_3\{\text{PtVO}(\text{SOCPh})_4\}] \cdot 1.5\text{tol}$ . Recrystallized yield: 73.5%. Anal. Calc'd. for  $\text{C}_{70}\text{H}_{83}\text{CeO}_8\text{PtS}_4\text{V}$ : C, 53.66; H, 5.34; N, 0%. Found: C, 53.34; H, 5.15; N, 0%. UV-vis-NIR ( $\text{C}_7\text{H}_8$ ) ( $\lambda_{\text{max}}$ , nm ( $\epsilon\text{M}$ ,  $\text{cm}^{-1}\text{M}^{-1}$ ): 317(147,000), 429(1370), 460(1020). IR ( $\text{cm}^{-1}$ ): 2955(br) m, 1502 m, 1405 s, 1233 s, 1175 s, 1096 w, 963 s, 911 s, 858 s, 818 m. Evans method (toluene- $d_8$ ): 1.9(9).

**$[\text{Nd}(\text{ODtbp})_3\{\text{PtVO}(\text{SOCMe})_4\}]$  (3Nd).** The same procedure as **3Ce** was performed with  $\text{Nd}(\text{ODtbp})_3$  (91.7 mg, 0.121 mmol) and  $[\text{PtVO}(\text{SOCMe})_4]$  (68 mg, 0.121 mmol). Red crystals of the composition  $[\text{Nd}(\text{ODtbp})_3\{\text{PtVO}(\text{SOCMe})_4\}]$ . Recrystallized yield: 84.5%. Anal. Calc'd. for  $\text{C}_{50}\text{H}_{75}\text{NdO}_8\text{PtS}_4\text{V}$ : C, 45.41; H, 5.72; N, 0%. Found: C, 45.28; H, 5.75; N, 0%. UV-vis-NIR ( $\text{C}_7\text{H}_8$ ) ( $\lambda_{\text{max}}$ , nm ( $\epsilon\text{M}$ ,  $\text{cm}^{-1}\text{M}^{-1}$ ): 304(23,800), 402(1520), 426(1600), 580(300), 591(267). IR ( $\text{cm}^{-1}$ ): 2954(br) m, 1532 m, 1403 s, 1240 s, 1159 s, 1098 w, 996 w, 912 s, 858 s, 818 m. Evans method (toluene- $d_8$ ): 3.1(4).

**$[\text{Nd}(\text{ODtbp})_3\{\text{PtVO}(\text{SOCPh})_4\}]$  (4Nd).** The same procedure as **3Ce** was performed with  $\text{Nd}(\text{ODtbp})_3$  (74.0 mg, 0.098 mmol) and  $[\text{PtVO}(\text{SOCPh})_4]$  (79.1 mg, 0.098 mmol). Red crystals of

the composition  $[\text{Nd}(\text{ODtbp})_3\{\text{PtVO}(\text{SOCPh})_4\}] \cdot 2 \text{ tol}$ . Recrystallized yield: 77.1%. Anal. Calc'd. for  $\text{C}_{70}\text{H}_{83}\text{NdO}_8\text{PtS}_4\text{V}$ : C, 53.52; H, 5.33; N, 0%. Found: C, 53.41; H, 5.47; N, 0%. UV-vis-NIR ( $\text{C}_7\text{H}_8$ ) ( $\lambda_{\text{max}}$ , nm ( $\epsilon\text{M}$ ,  $\text{cm}^{-1}\text{M}^{-1}$ )): 317(122,000), 430(1250), 462(972), 581(210), 592(202). IR ( $\text{cm}^{-1}$ ): 2954(br) m, 1595 w, 1500 m, 1403 s, 1219 s, 1175 s, 1098 w, 963 s, 909 s, 859 s, 818 m. Evans method (toluene- $d_8$ ): 2.8(9).

### *X-Ray Crystallography*

X-ray collection parameters are collected in **Table S1**. Data collection, solution, and refinement were performed by Prof. Arnold Rheingold at the University of California-San Diego on **1**, **2**, and **4Nd**. Suitable crystals of **1**, **2**, and **4Nd** were selected and data were collected on a Bruker APEX-II CCD diffractometer. The crystals were kept at 100 K during data collection. Using Olex2,<sup>6</sup> the structures were solved with the XT<sup>7</sup> structure solution program using Direct Methods and refined with the XL<sup>8</sup> refinement package using Least Squares minimization. X-ray data refinement was performed by Dr. Jeffrey Bacon at Boston University on data collected and solved at the University of Edinburgh. Suitable crystals of **3Ln** and **4Ce** were selected and data were collected on a Xcalibur Eos single crystal x-ray diffractometer with Mo K $\alpha$  radiation at 170(2) K. Structures **3Ln** and **4Ce** were solved using SHELXT and least squares refinement using SHELXL in Olex2.<sup>7</sup> Absorption corrections were applied using CrysAlis PRO 1.171.38.42b (Rigaku Oxford Diffraction, 2015) or 1.171.37.34 (Agilent Technologies, 2014) software. Unless otherwise stated, all non-hydrogen atoms refined with anisotropic displacement parameters and hydrogen atoms were placed and refined using a riding model.

### *Magnetic Measurements*

Magnetic susceptibility data for **1** were collected by Brooke N. Livesay using a Quantum Design MPMS XL SQUID magnetometer housed at Colorado State University, Fort Collins, Colorado. Finely ground samples were loaded into polyethylene bags, sealed on the benchtop, and then inserted into drinking straws. Ferromagnetic impurity checks were performed by sweeping the field (0 - 10 kOe) at 100 K: linearity in the plot (Figure S7, top) indicates lack of

significant ferromagnetic impurities. Static (dc) magnetic susceptibility data were collected at temperatures ranging from 2 K to 300 K at applied fields of 1 kOe and 10-50 kOe. Magnetization measurements were collected at 1.8 K while varying the applied field up to 50 kOe. The molar mass used for all data work up assumes two PtV=O lantern units. Data were corrected for the magnetization of the sample holder by subtracting the susceptibility of an empty container, and for diamagnetic contributions of the sample by using Pascal's constants.<sup>9</sup> Magnetic susceptibility data were interpreted by Brooke N. Livesay and Prof. Matthew P. Shores and fit to various models using PHI,<sup>10</sup> with the general spin Hamiltonian:

$$\hat{H} = -2JS_1 \cdot S_2$$

Magnetic susceptibility measurements of complexes **3Ln-4Ln** were collected using a Quantum Design SQUID magnetometer at the University of Copenhagen. The air sensitive samples were obtained as sealed glass vials, opened and handled in an oxygen- and water-free glovebox. A small amount of ground powder (15-50 mg) was pressed inside a Teflon tape and inserted in drinking straws. The compounds were taken outside the glovebox under liquid nitrogen and immediately inserted in the He atmosphere of the instrument. The magnetic data were collected and corrected for any magnetic impurity by measuring a magnetization curve at room temperature. The diamagnetism of the Teflon tape and of the organic backbone was corrected by using Pascal's constants.

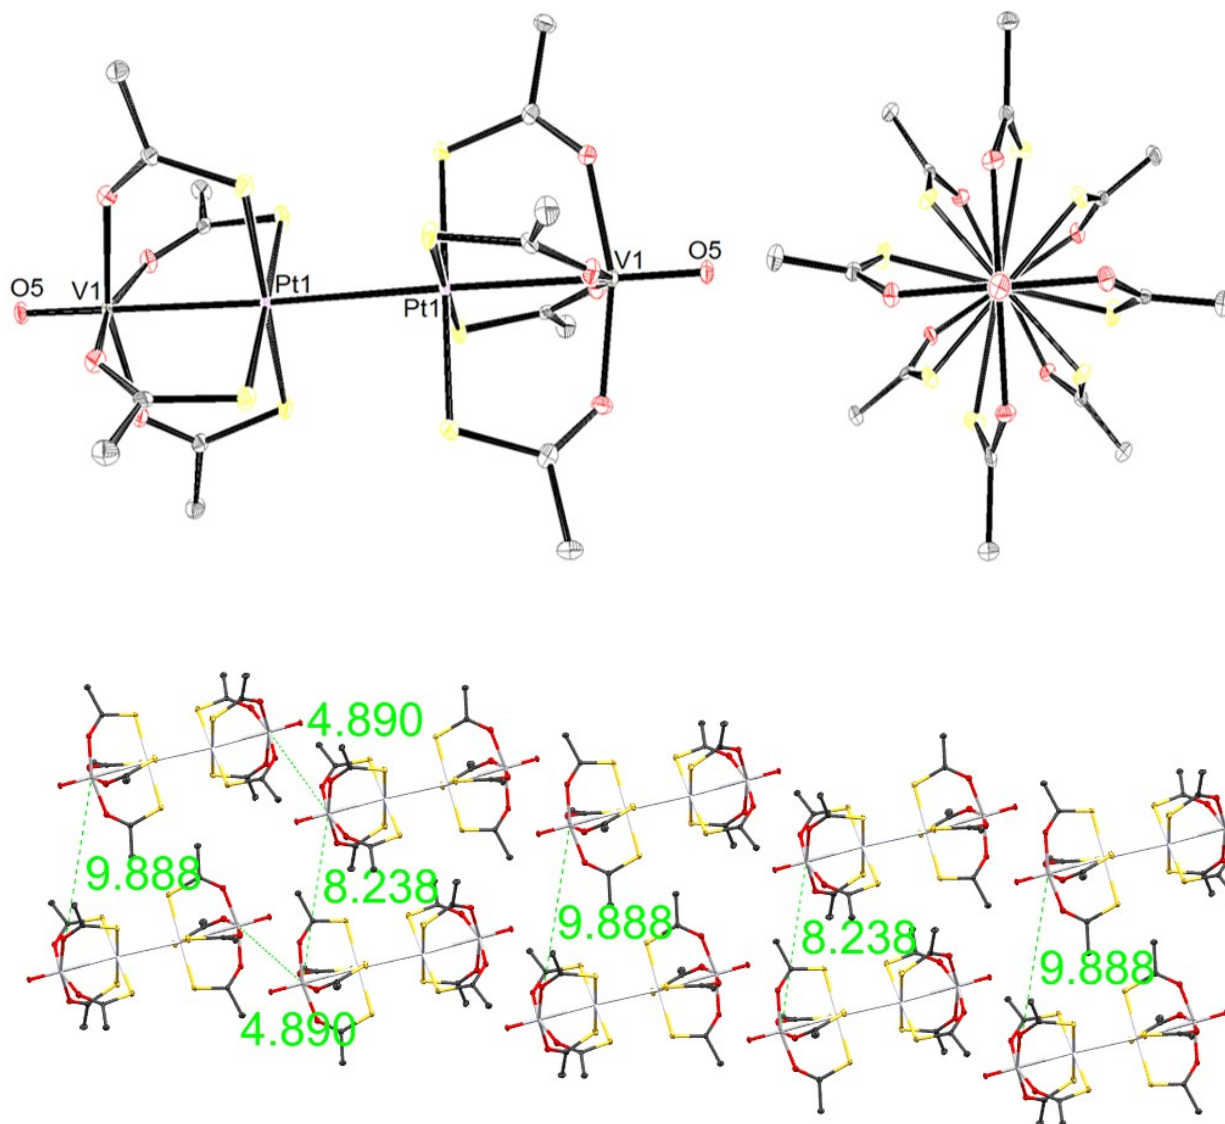

**Figure S1:** ORTEP of **1** (top left), staggered thiocarboxylate backbone as viewed along the M-M vector (top right). Ellipsoids shown at the 50% level and hydrogen atoms omitted for clarity. Packing diagram of **1** (bottom).



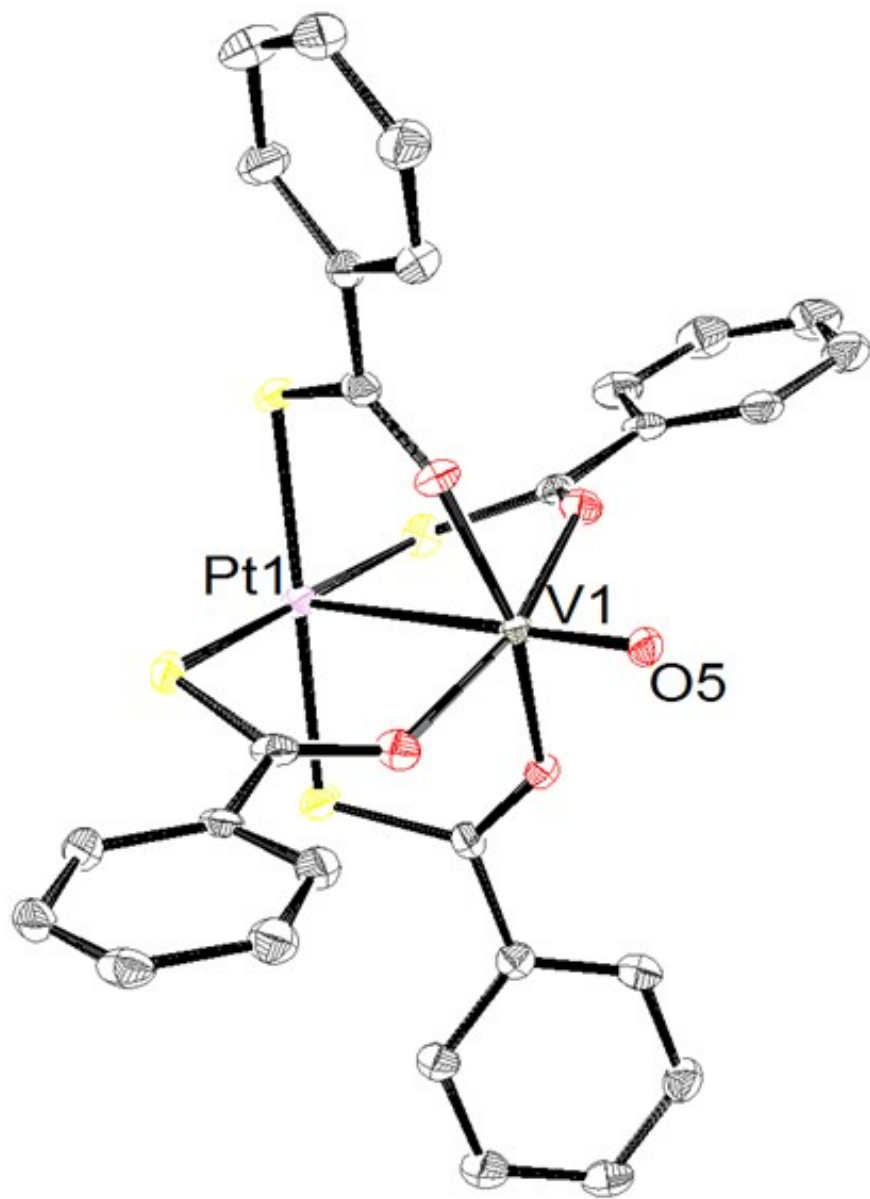

**Figure S2:** ORTEP of **2**. Hydrogen atoms and one equivalent of CH<sub>2</sub>Cl<sub>2</sub> are omitted for clarity, and ellipsoids are drawn at the 50% level.

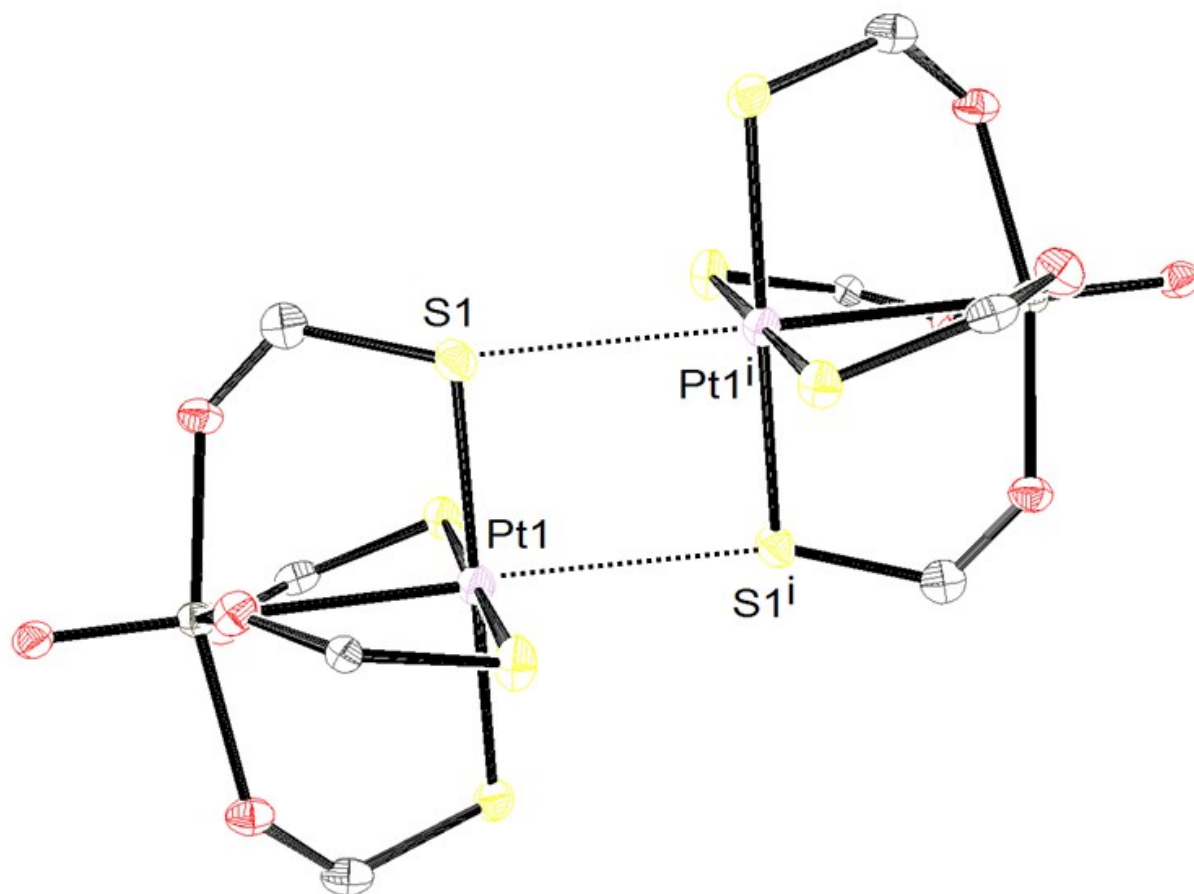

**Figure S3:** ORTEP displaying the inter-lantern contacts in **2**. Two equivalents of CH<sub>2</sub>Cl<sub>2</sub> and the phenyl groups on the lanterns are omitted for clarity. The superscript i denotes atoms related by a C<sub>2</sub> rotation.

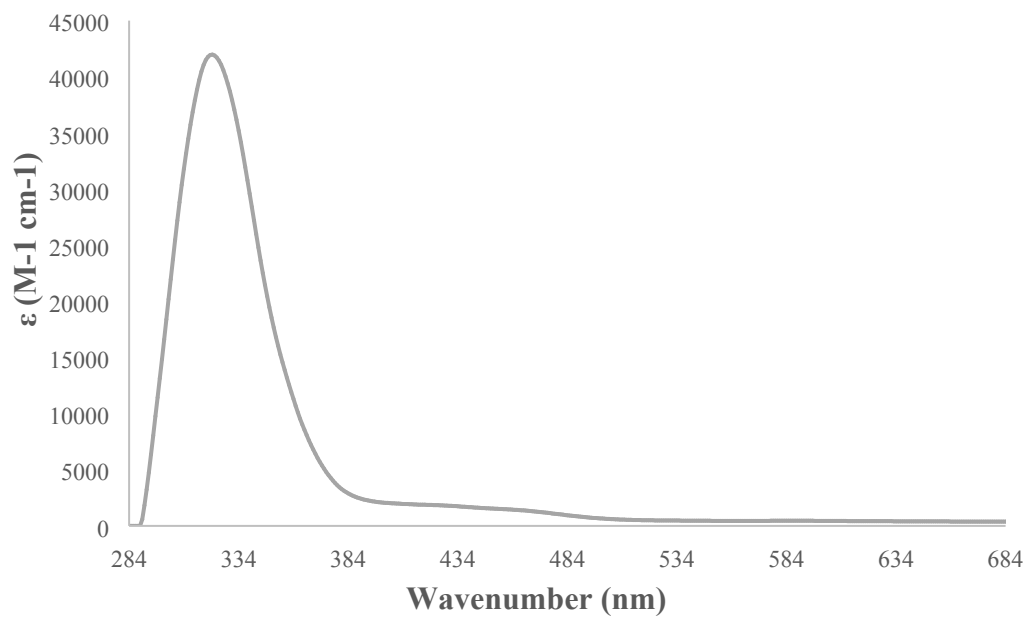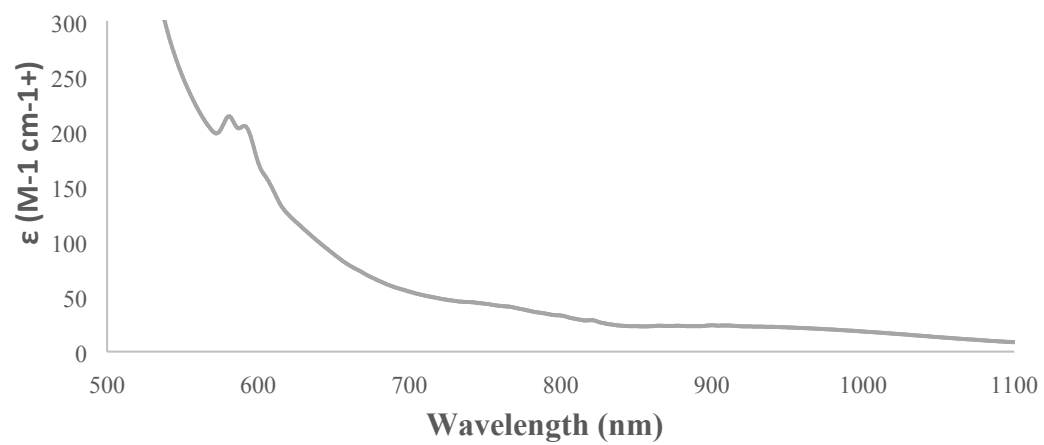

**Figure S4:** UV-vis spectrum of **4Nd**.

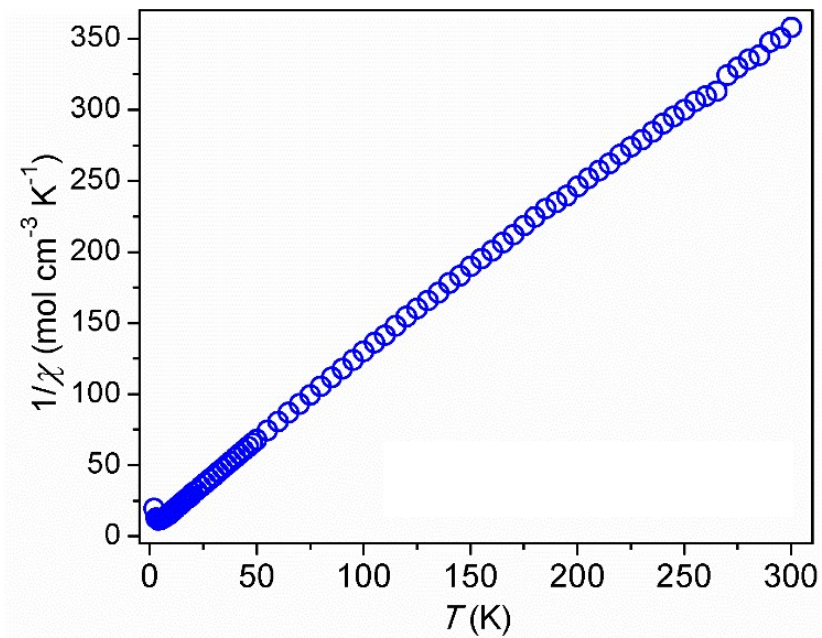

**Figure S5:** Temperature dependence of  $1/\chi_{\text{para}}$  for **1**, collected at 1 kOe. Calculated Weiss constants ( $\Theta$ ) were determined using linear regression in several temperature ranges: -12.9 K (50-300 K), -17.1 K (100-300 K), -20.8 K (150-300 K), and -20.9 K (200-300 K).

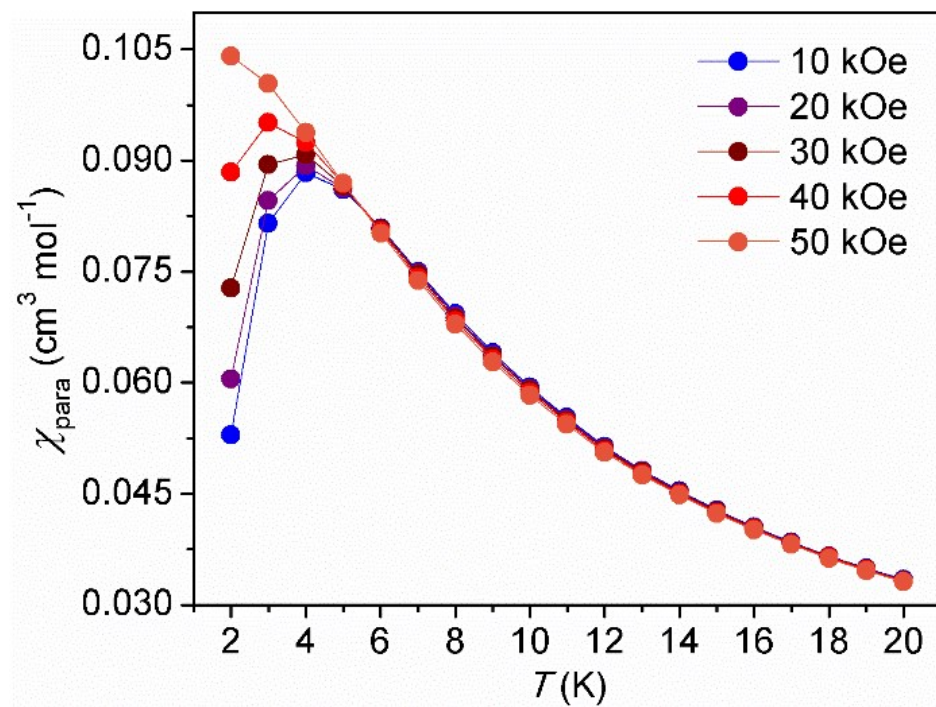

**Figure S6:** Low temperature dependence of molar magnetic susceptibility ( $\chi_{\text{para}}$ ) (2 - 20 K) of **1** collected at applied fields of 10 to 50 kOe. Lines are guides for the eye.

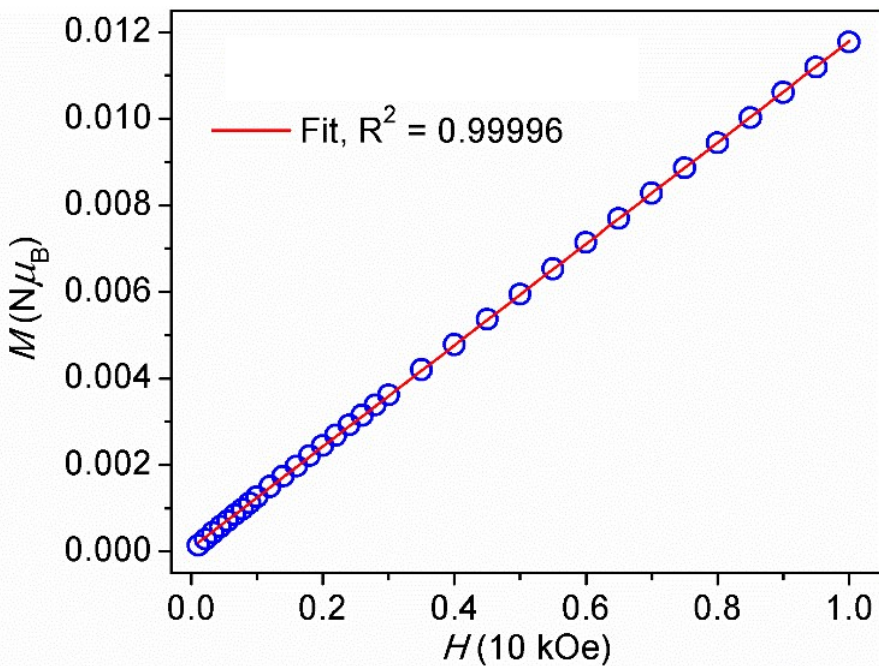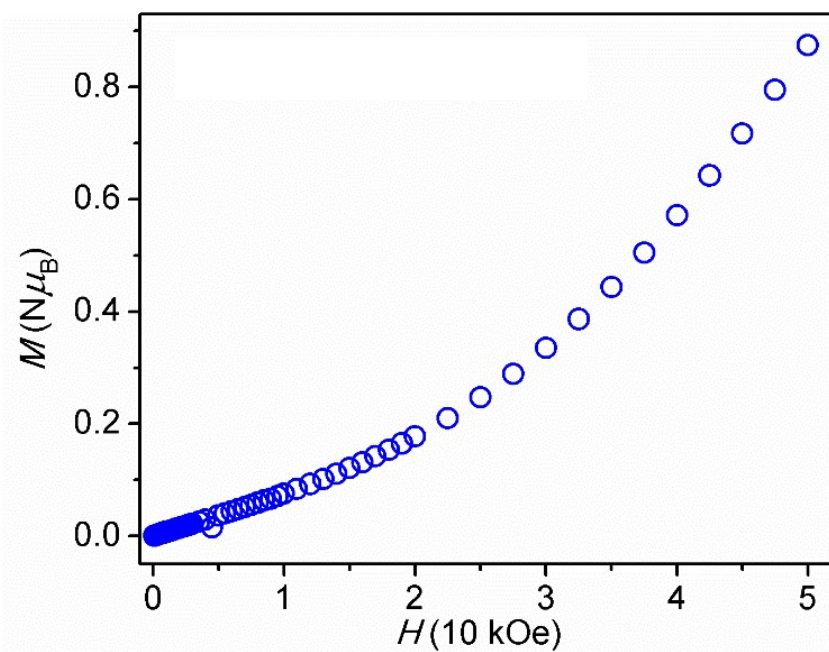

**Figure S7:** Top: Field dependence of magnetization at 100 K for **1**. Fit:  $y = 11.7 \times 10^{-3}(x) + 7.67 \times 10^{-5}$  ( $R^2 = 0.99996$ ). Bottom: Field dependence of magnetization collected at 1.8 K for **1**.

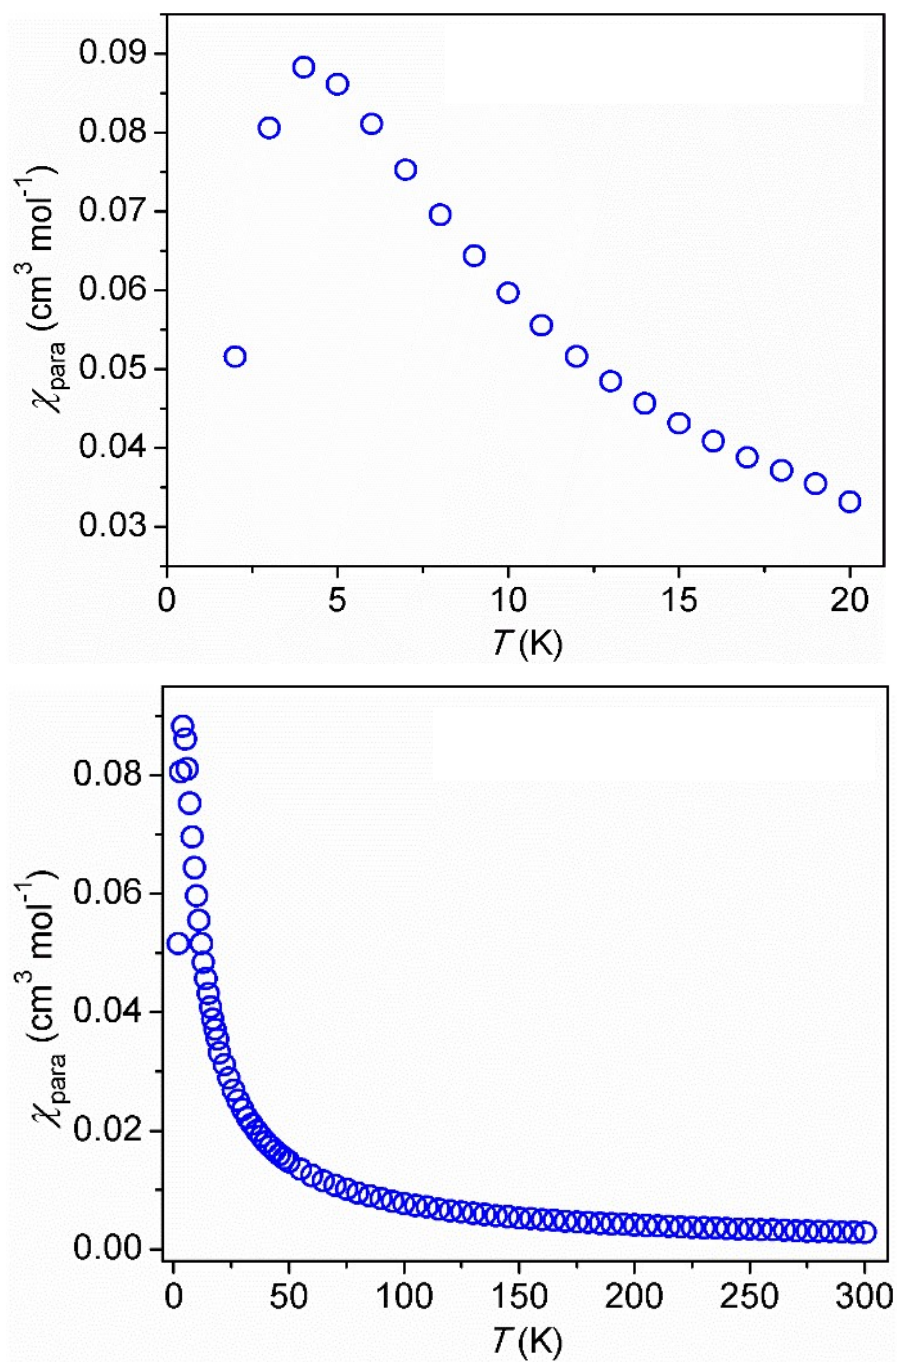

**Figure S8:** Temperature dependence of molar magnetic susceptibility ( $\chi_{\text{para}}$ ) for **1**, collected at 1 kOe.



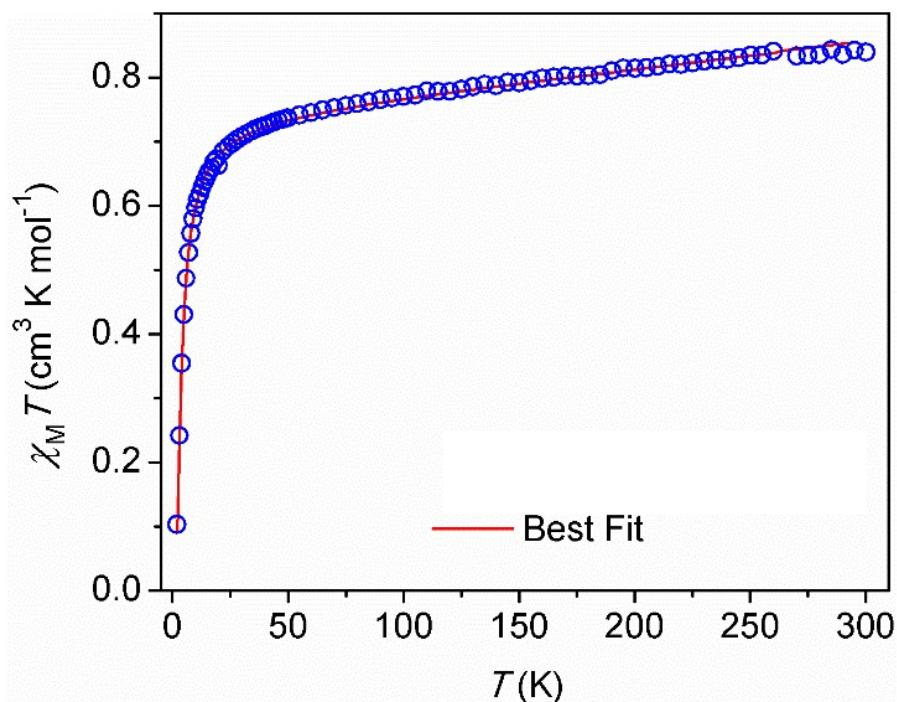

**Figure S9:** Temperature dependence on magnetic susceptibility – temperature product ( $\chi_M T$ ) of **1** “dimer” collected at 1 kOe. The molar mass used assumes two PtV=O lantern units. The fit was calculated using PHI.

*A note on the magnetic data interpretation for 1:*

The magnetic susceptibility data were fit to a model assuming exchange interactions between two  $S = \frac{1}{2}$  centers within the “dimer” lantern species. Magnetic susceptibility data were fit to various models using PHI, using the  $2J$  formalism. The best fit gives an isotropic  $g = 1.98$  and exchange coupling  $J = -2.35 \text{ cm}^{-1}$ , assuming  $\text{TIP} = 400 \times 10^{-6} \text{ cm}^3 \text{ mol}^{-1}$ . The calculated  $g$  value agrees with other V(IV) compounds with similar coordination environments. The exchange coupling ( $J$ ) suggests weak intramolecular antiferromagnetic coupling. The addition of a mean field approximation does not improve the fit, suggesting minimal additional intermolecular antiferromagnetic coupling. Related linear  $\text{MPt} \cdots \text{PtM}$  complexes show antiferromagnetic coupling; however, a concern with this “dimer” interpretation is that there is not an obvious



orbital pathway by which intramolecular superexchange can operate: whether unpaired electrons are in local (V-based)  $d_{xy}$  or  $d_{xz/yz}$  orbitals, the relative orientation of the vanadyl lanterns precludes orbital overlap that would lead to antiferromagnetic coupling. The fact that the compound crystallizes in a symmetry lower than tetragonal leaves some possibility for an orbital pathway for antiferromagnetic exchange coupling. More likely, any “dimer” behavior could be best rationalized by intermolecular coupling between V(IV) ions on adjacent complexes: the minimum such contact is less than 5 Å (Figure S1 bottom). We note that several next-nearest neighbor interactions are also possible and might compete.

Adding to (next-)nearest neighbor exchange coupling, the temperature dependence of susceptibility ( $\chi_M$ ) reveals an antiferromagnetic phase change, with a Néel temperature of 4 K (Figures S8). Curie-Weiss analysis of the temperature dependence of inverse susceptibility (Figure S5) gives a Weiss constant ( $\Theta$ ) ranging from -13 K to -21 K, depending on the chosen temperature range. That  $\Theta$  is larger than the observed ordering temperature indicates competing interactions, as expected from the packing of complexes (Figure S1 bottom).

To further investigate these long-range interactions, we measured the temperature dependence of  $\chi_{para}$  (2-20 K) at applied fields up to 50 kOe (Figure S6). Upon increasing the applied field, there is a shift in the Néel temperature to lower values. At 50 kOe, antiferromagnetic ordering occurs beyond the lowest temperature measured (2 K). The data are consistent with metamagnetic behavior where antiferromagnetic ordering is converted to paramagnetism via applied fields.

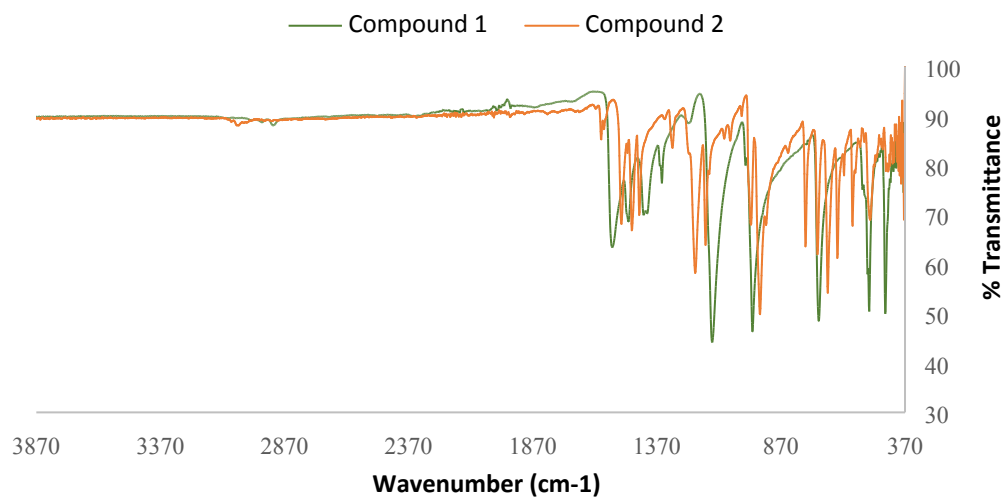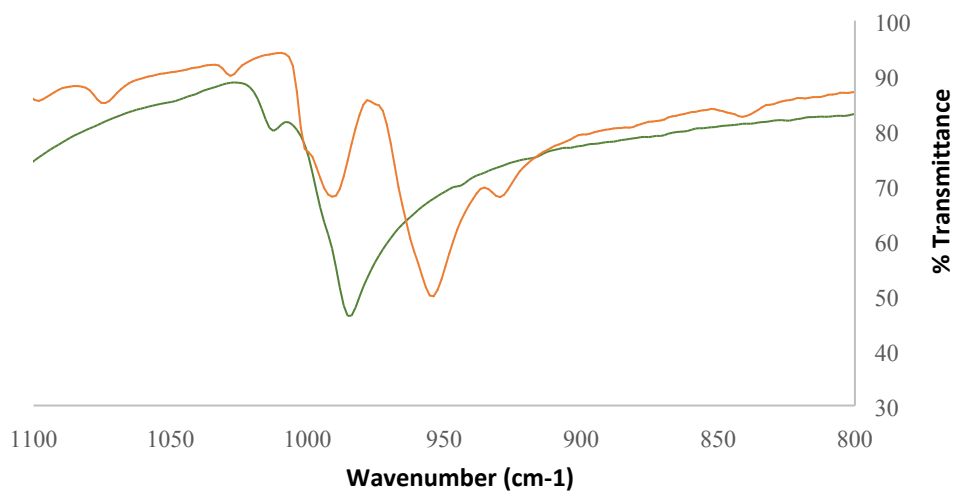

**Figure S10:** Top: IR spectra of **1** (green) and **2** (orange). Bottom: {V=O} stretch of **1** and **2**.

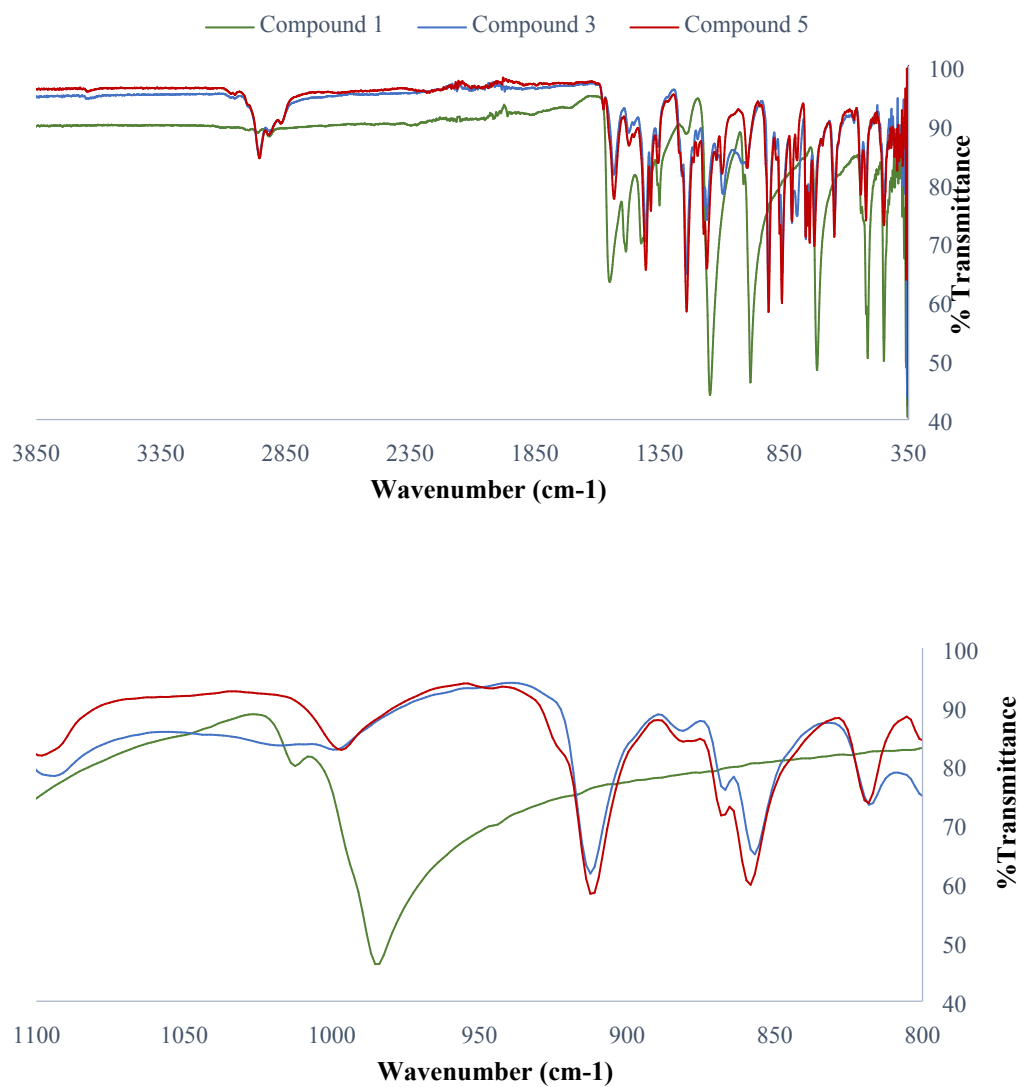

**Figure S11:** IR spectra comparison of **1** (green), **3Ce** (blue), and **3Nd** (red). Inset shows {V=O} stretching.

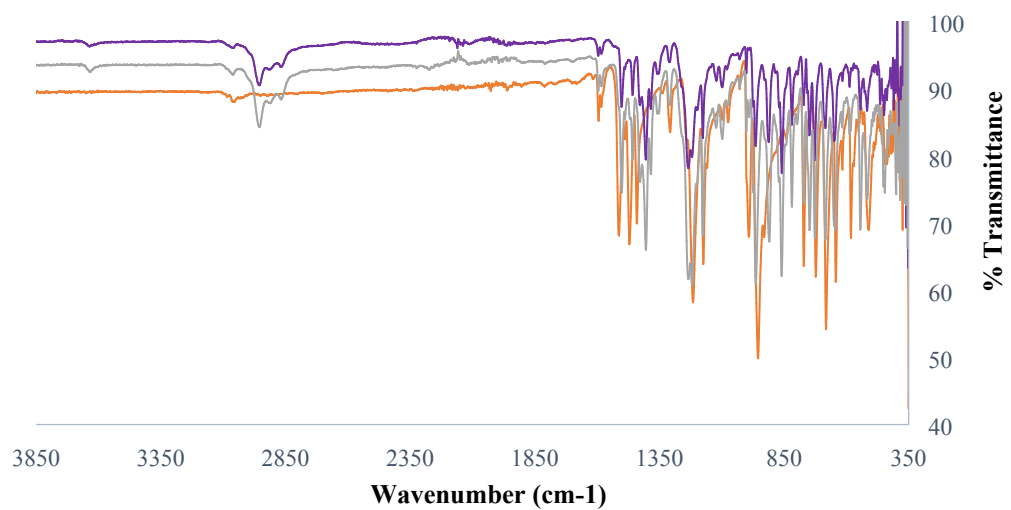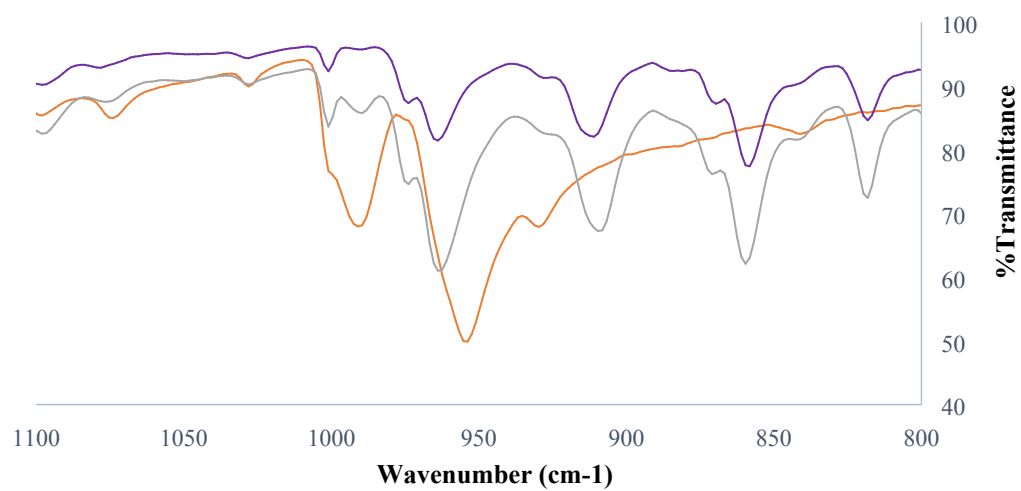

**Figure S12:** IR spectra comparison of **2** (orange), **4Ce** (purple), and **4Nd** (gray). Inset shows {V=O} stretching.

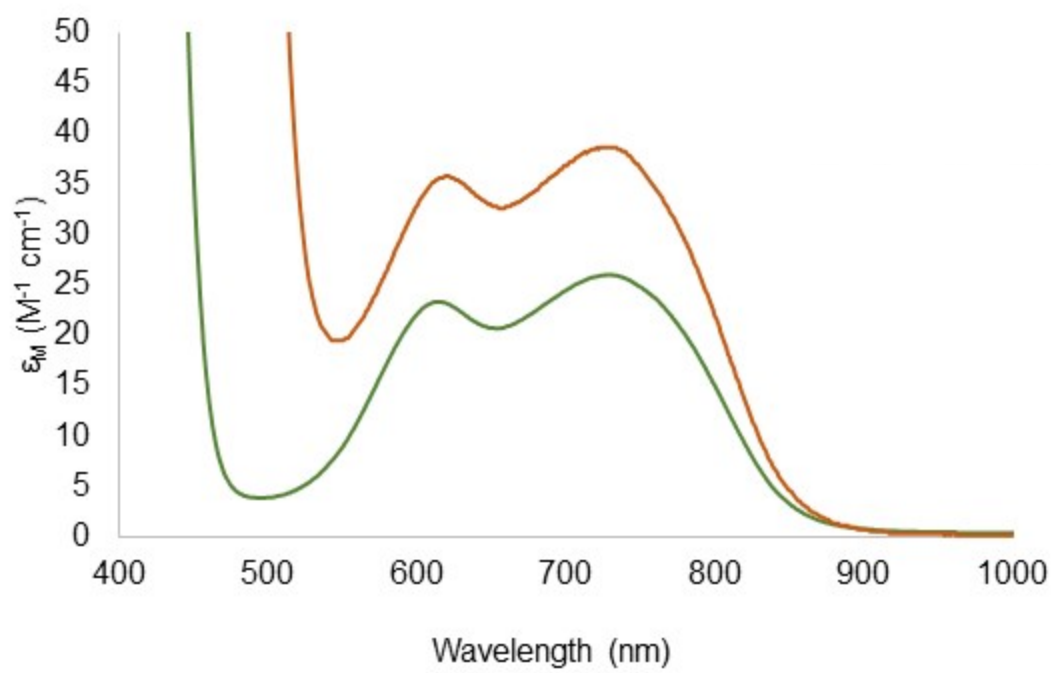

**Figure S13:** UV-vis spectra for the visible range of **1** (green) and **2** (orange) in CHCl<sub>3</sub>.

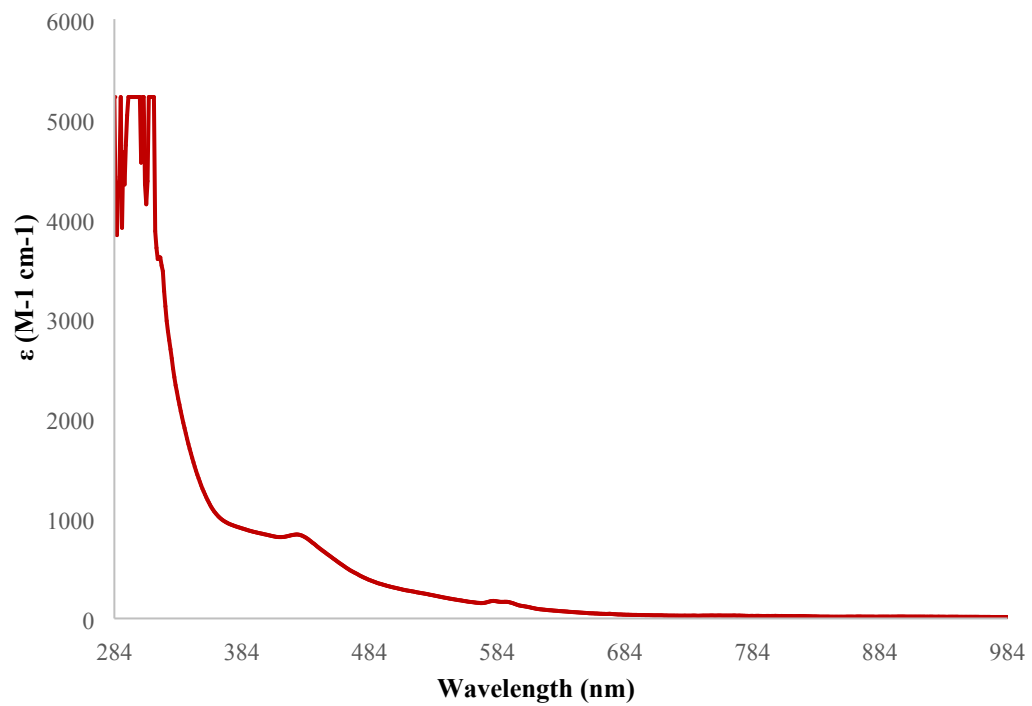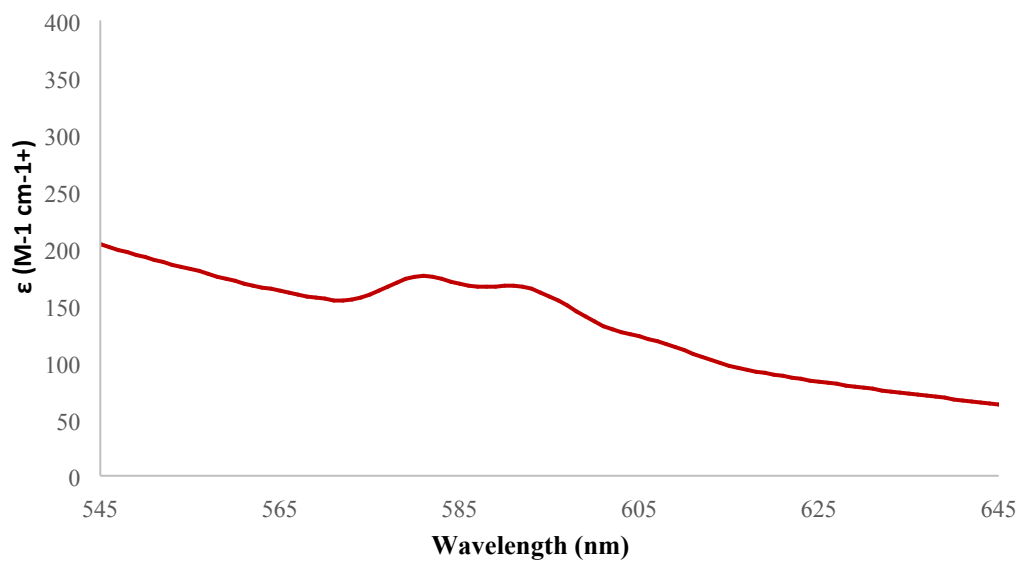

**Figure S14:** UV-vis spectrum of **3Nd** in toluene.

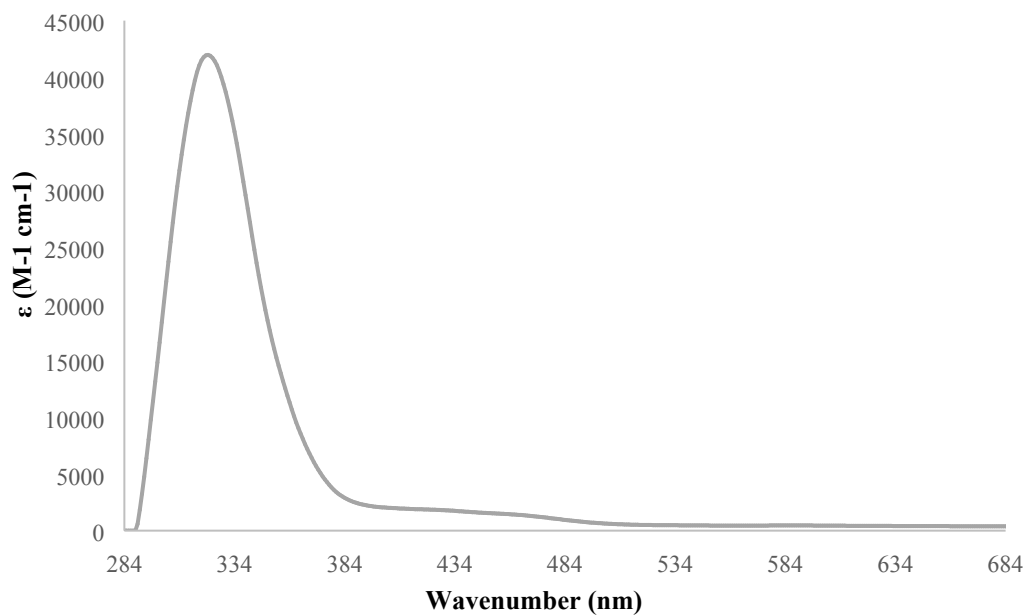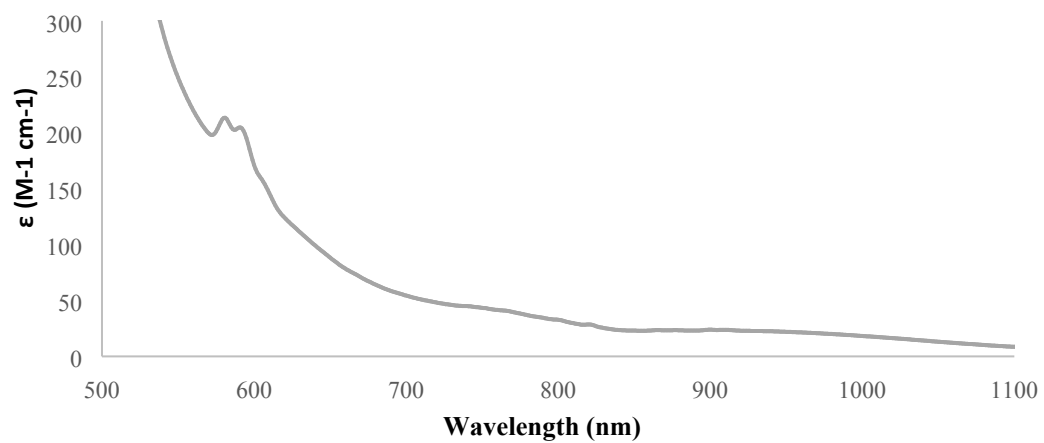

**Figure S15:** UV-vis spectrum of **4Nd** in toluene.

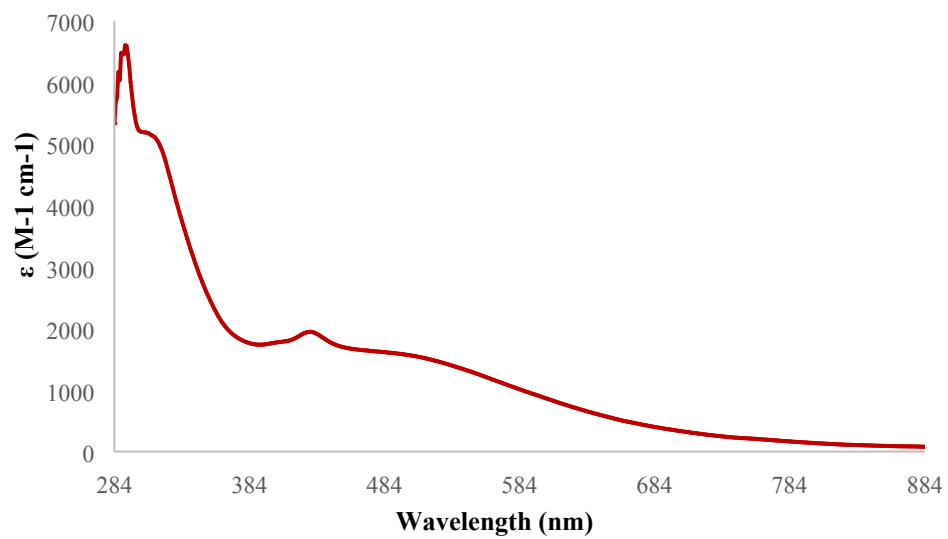

**Figure S16:** UV-vis spectrum of **3Ce** in toluene.



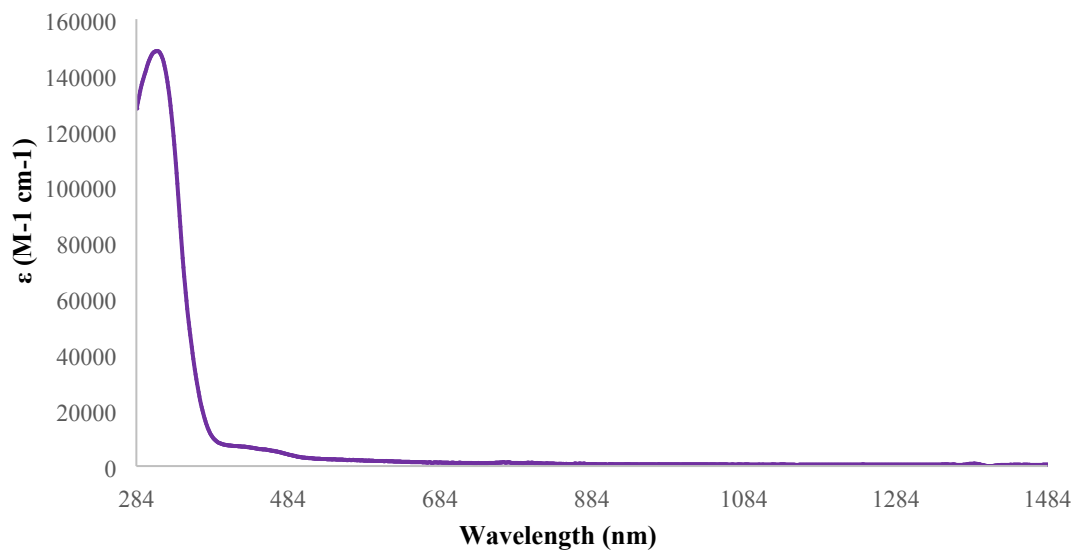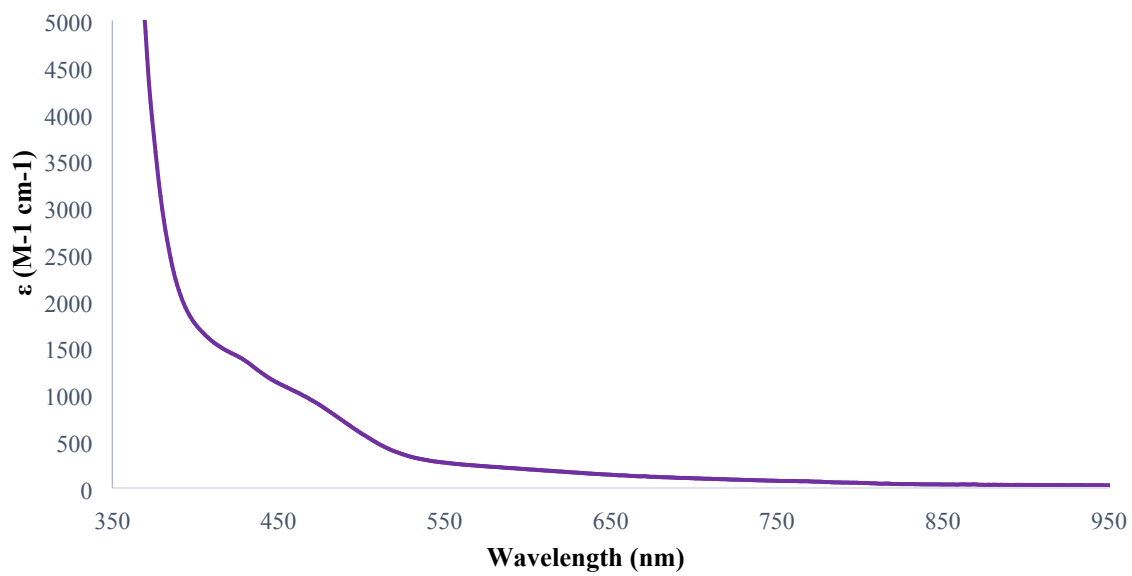

**Figure S17:** UV-vis spectrum of **4Ce** in toluene.

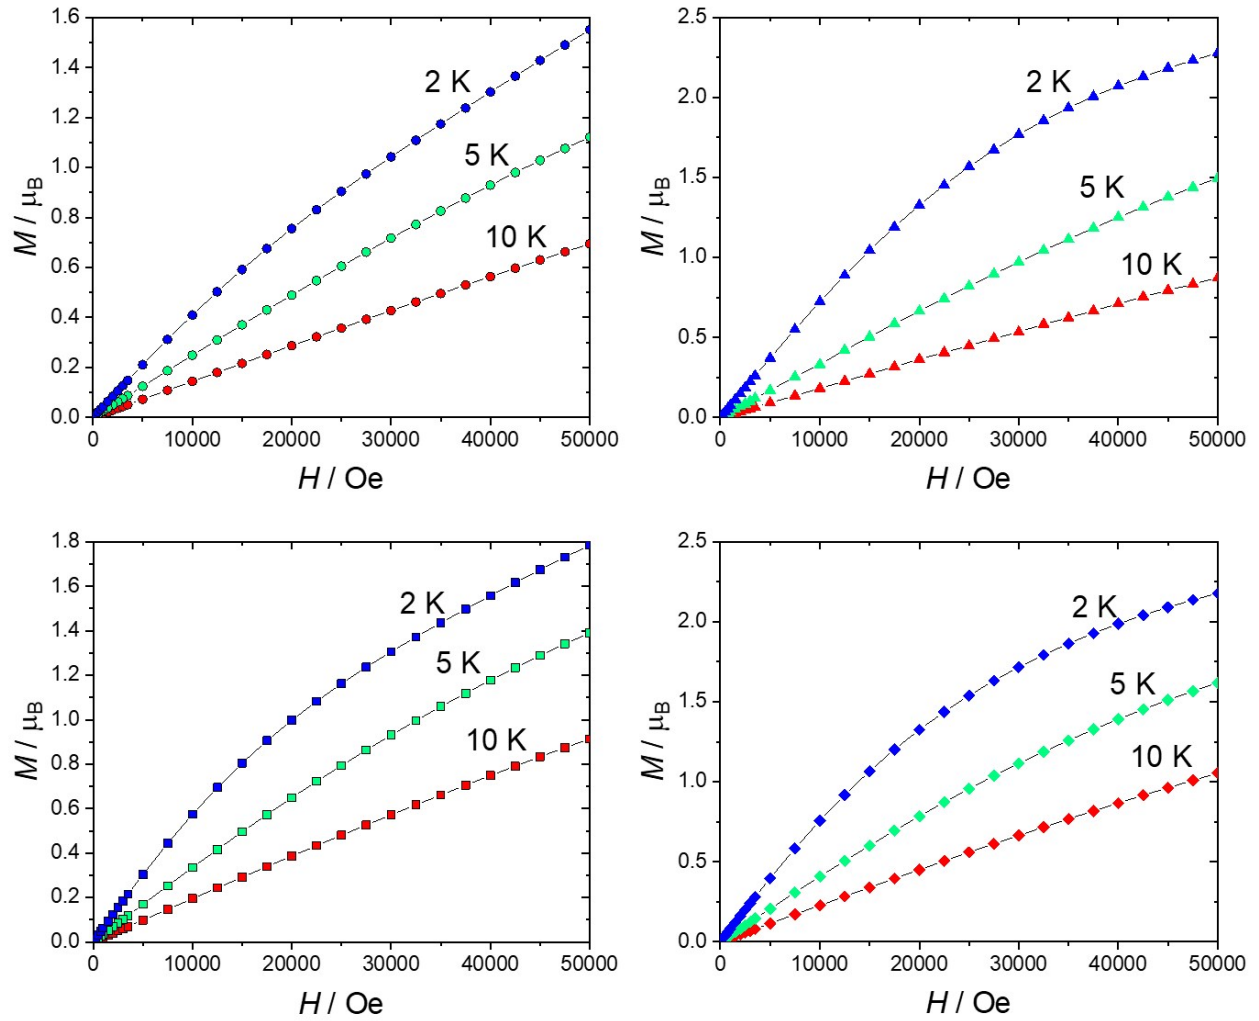

**Figure S18:**  $M$  vs  $H$  magnetization curves at  $T = 2\text{ K}$  (blue),  $5\text{ K}$  (green), and  $10\text{ K}$  (red). Circles (**3Ce** – top left), triangles (**4Ce** – top right), squares (**3Nd** – bottom left), diamonds (**4Nd** – bottom right).

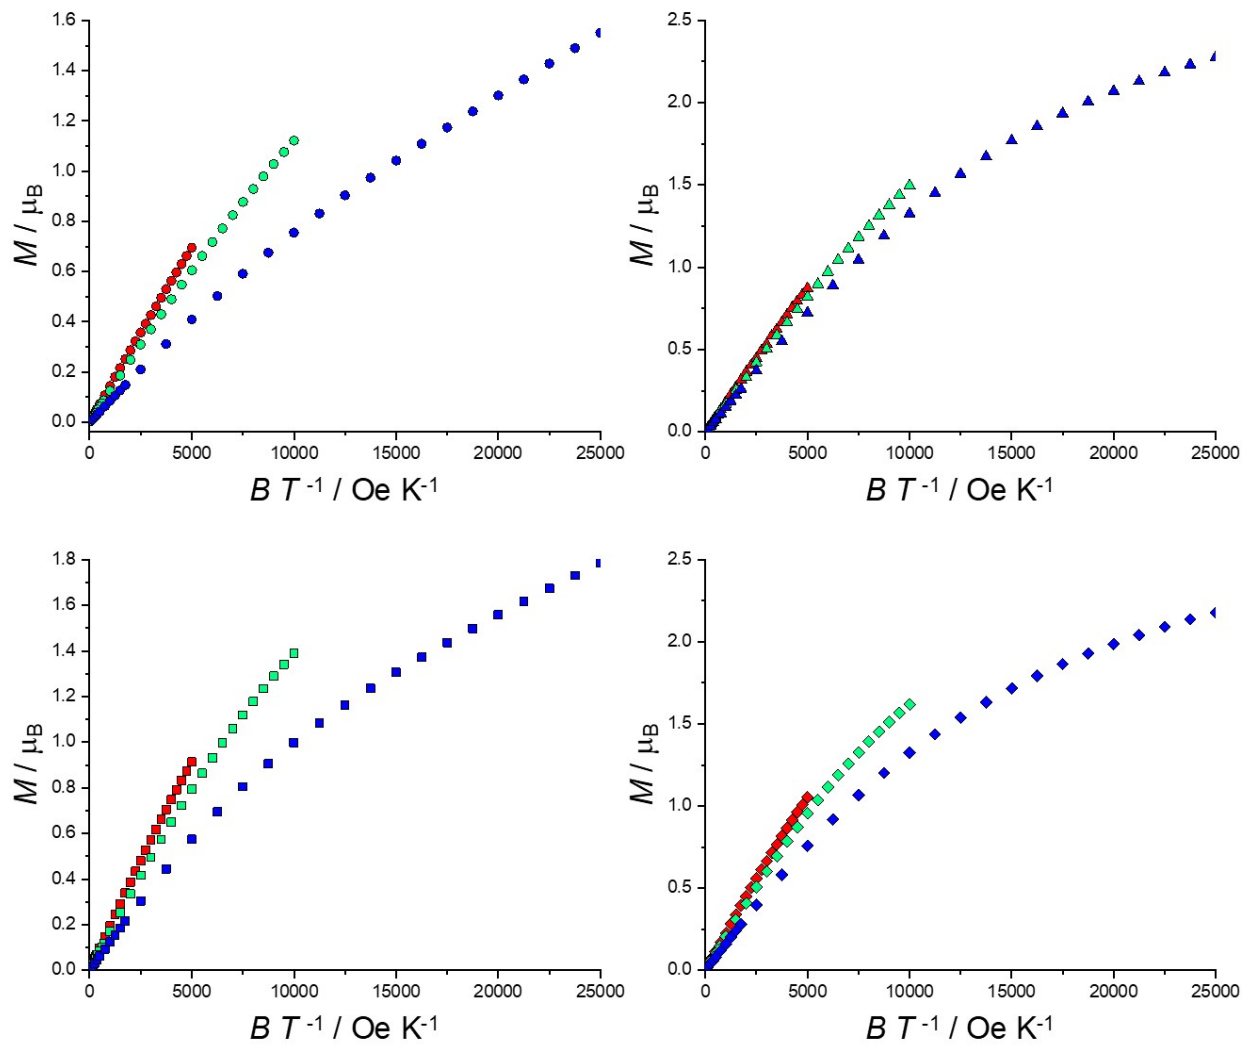

**Figure S19:**  $M$  vs  $B/T$  curves. at  $T = 2\text{K}$  (blue),  $5\text{K}$  (green), and  $10\text{K}$  (red). Circles (**3Ce** – top left), triangles (**4Ce** – top right), squares (**3Nd** – bottom left), diamonds (**4Nd** – bottom right).

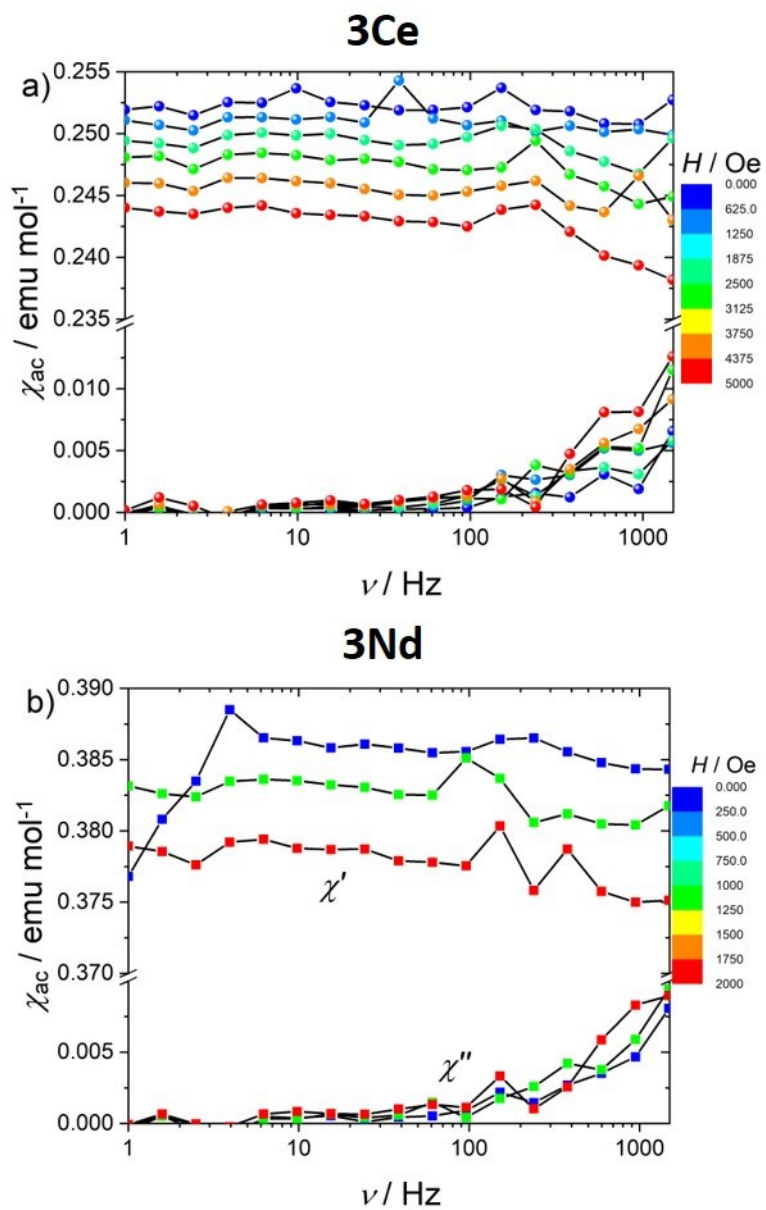

**Figure S20:** Alternating current (ac) susceptibility measurements at varying fields, T = 2K of **3Ce** (circles) and **3Nd** (squares).

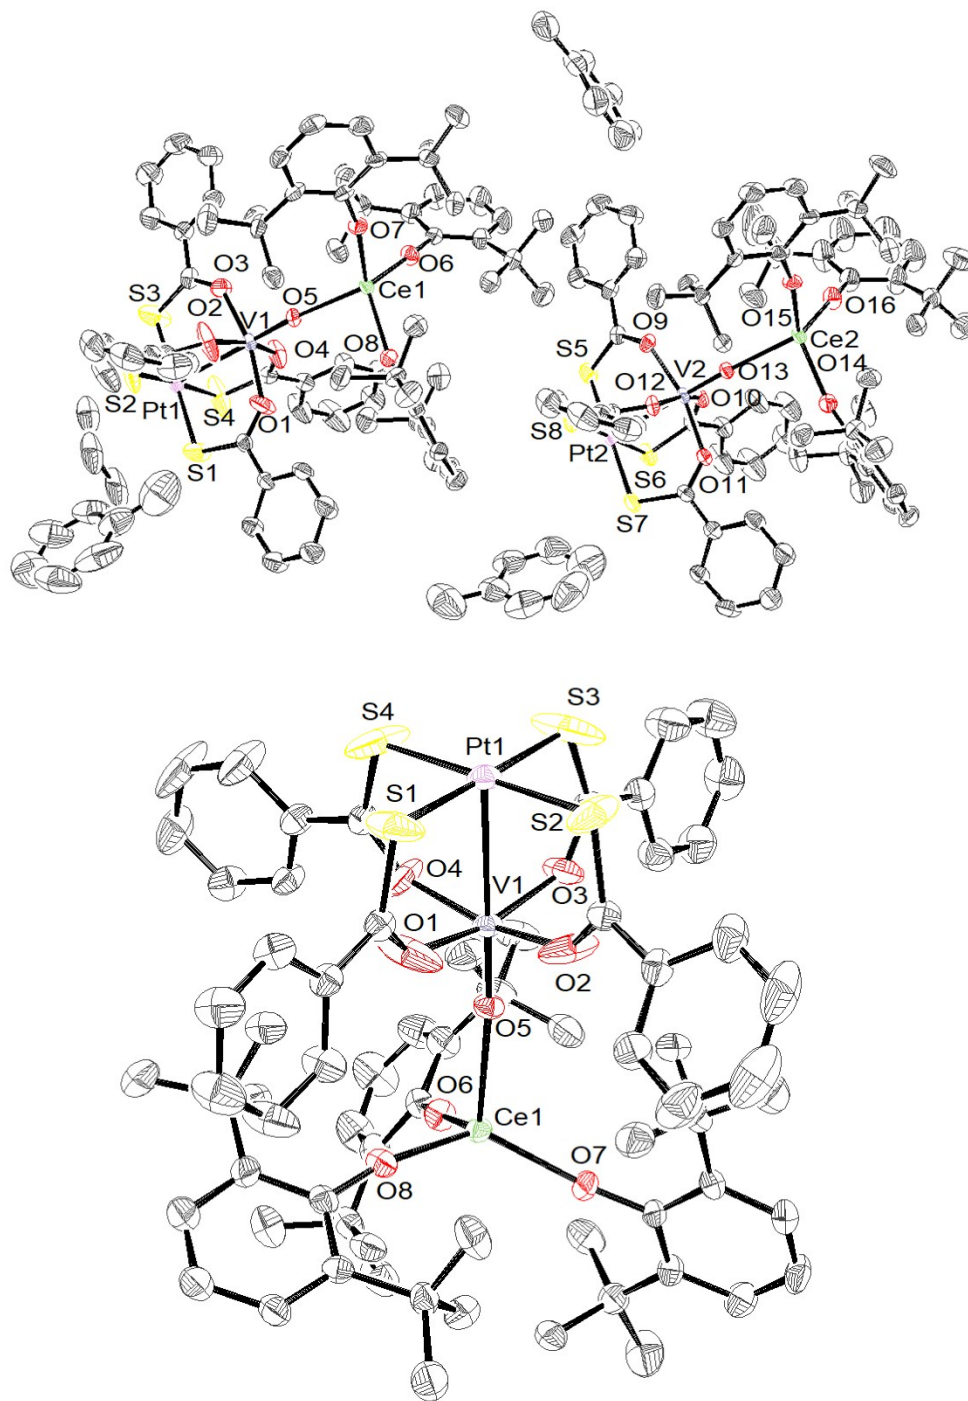

**Figure S21:** ORTEP of **4Ce**. Top: two independent molecules shown with lattice solvent, H atoms excluded for clarity, ellipsoids shown at the 50% level. Bottom: Molecule **4Cea** shown, H atoms and solvent molecules excluded for clarity, ellipsoids shown at the 50% level.

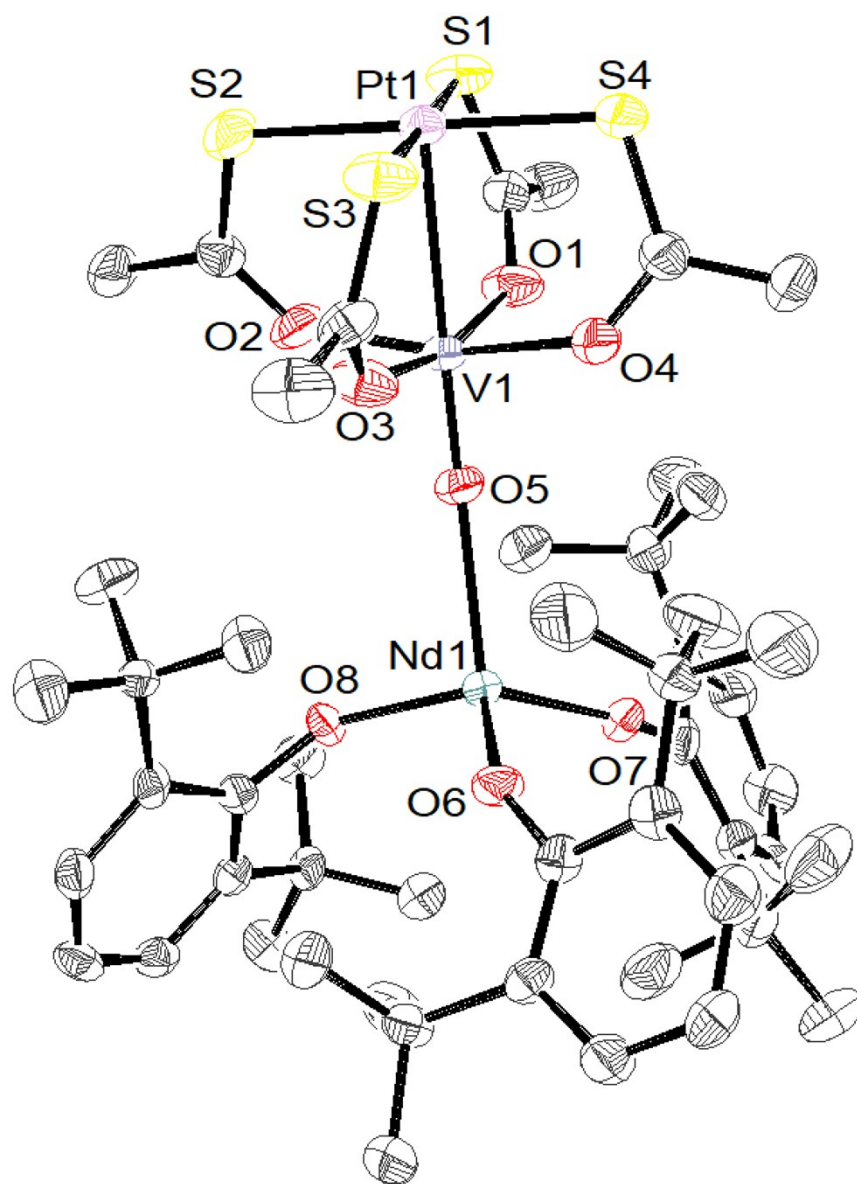

**Figure S22:** ORTEP of **3Nd**, H atoms excluded for clarity. Ellipsoids shown at the 50% level.

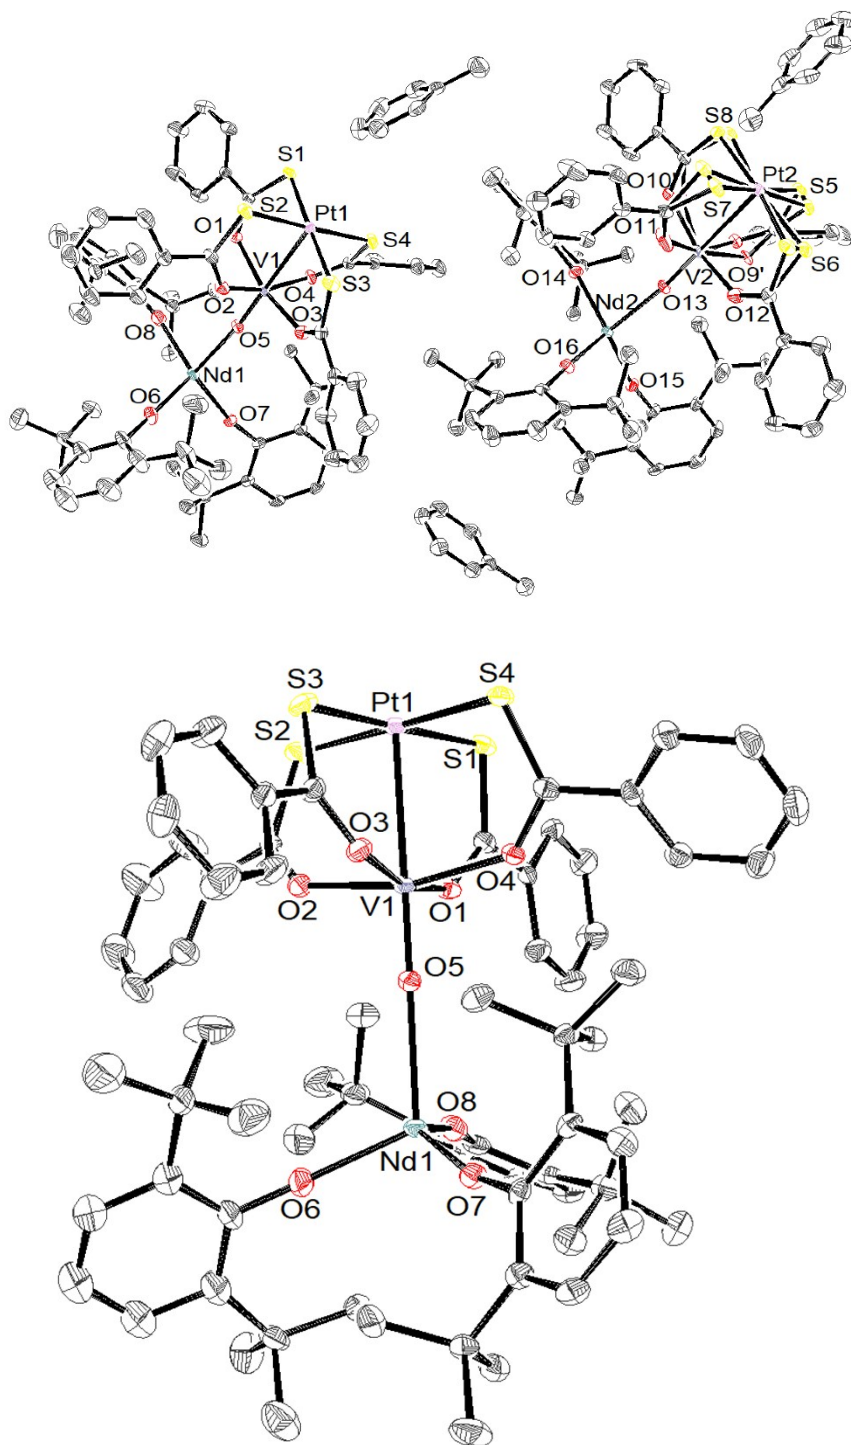

**Figure S23:** ORTEP of **4Nd**. Top: two independent molecules shown with lattice solvent, ellipsoids shown at the 50% level, hydrogen atoms excluded for clarity. Bottom: Molecule **4Nd<sub>a</sub>** shown, hydrogen atoms and solvent molecules excluded for clarity, ellipsoids shown at the 50% level.

**Table S1.** Select interatomic distances (Å) and angles (°) for **1-2**

| COMPOUND | DISTANCE<br>(Å)           |            | ANGLE (°)                     |             |
|----------|---------------------------|------------|-------------------------------|-------------|
| <b>1</b> | Pt(1)-V(1)                | 2.8635(6)  | V(1)-Pt(1)-S(1)               | 90.11(2)    |
|          | V(1)-O(1)                 | 1.592(2)   | V(1)-Pt(1)-Pt(1)              | 177.168(11) |
|          | Pt(1)···Pt(1)             | 3.1747(4)  | S(1)-Pt(1)-Pt(1)              | 90.30(2)    |
| <b>2</b> | Pt(1)-V(1)                | 2.7823(10) | V(1)-Pt(1)-S(1)               | 89.31(4)    |
|          | V(1)-O(5)                 | 1.581(4)   | V(1)-Pt(1)-S(1) <sup>i</sup>  | 176.24(3)   |
|          | Pt(1)···S(1) <sup>i</sup> | 3.1266(14) | V(1)-Pt(1)-Pt(1) <sup>i</sup> | 143.62(2)   |



**Table S2.** Summary of X-ray crystallographic data collection parameters for **1-4Nd**

| <i>Compound</i>                         | <b>1</b>                                                         | <b>2·CH<sub>2</sub>Cl<sub>2</sub></b>                                             | <b>3Ce · 0.5HMDSO · 4Ce · 2 toluene</b><br><i>toluene</i>               | <b>3Nd</b>                                                          | <b>4Nd</b>                                                          |                                                                       |
|-----------------------------------------|------------------------------------------------------------------|-----------------------------------------------------------------------------------|-------------------------------------------------------------------------|---------------------------------------------------------------------|---------------------------------------------------------------------|-----------------------------------------------------------------------|
| <i>Formula</i>                          | C <sub>8</sub> H <sub>12</sub> O <sub>5</sub> PtS <sub>4</sub> V | C <sub>29</sub> H <sub>22</sub> O <sub>5</sub> Cl <sub>2</sub> PtS <sub>4</sub> V | C <sub>60</sub> H <sub>92</sub> O <sub>8.5</sub> SiPtS <sub>4</sub> VCe | C <sub>84</sub> H <sub>99</sub> O <sub>8</sub> PtS <sub>4</sub> VCe | C <sub>50</sub> H <sub>75</sub> O <sub>8</sub> PtS <sub>4</sub> VNd | C <sub>80.5</sub> H <sub>95</sub> O <sub>8</sub> PtS <sub>4</sub> VNd |
| <i>Formula Weight</i>                   | 562.45                                                           | 895.63                                                                            | 1490.36                                                                 | 1749.44                                                             | 1319.25                                                             | 1709.07                                                               |
| <i>Crystal System</i>                   | Monoclinic                                                       | Triclinic                                                                         | Monoclinic                                                              | Triclinic                                                           | Orthorhombic                                                        | Triclinic                                                             |
| <i>Space Group</i>                      | <i>C2/c</i>                                                      | <i>P-1</i>                                                                        | <i>P 2<sub>1</sub>/n</i>                                                | <i>P 1 bar</i>                                                      | <i>Pcba</i>                                                         | <i>P-1</i>                                                            |
| <i>a, Å</i>                             | 27.225(2)                                                        | 11.7092(11)                                                                       | 15.9088(2)                                                              | 16.9219(3)                                                          | 20.6526(5)                                                          | 16.7686(12)                                                           |
| <i>b, Å</i>                             | 8.3989(8)                                                        | 11.7557(10)                                                                       | 23.5478(5)                                                              | 22.5655(3)                                                          | 21.3478(4)                                                          | 22.4235(16)                                                           |
| <i>c, Å</i>                             | 15.7502(15)                                                      | 12.2506(11)                                                                       | 17.7553(2)                                                              | 22.5881(3)                                                          | 25.5068(6)                                                          | 22.4927(17)                                                           |
| <i>α, °</i>                             | 90                                                               | 71.254(4)                                                                         | 90                                                                      | 81.4710(10)                                                         | 90                                                                  | 81.3420(10)                                                           |
| <i>β, °</i>                             | 122.160(3)                                                       | 75.235(5)                                                                         | 93.8100(10)                                                             | 83.2750(10)                                                         | 90                                                                  | 72.858(2)                                                             |
| <i>γ, °</i>                             | 90                                                               | 88.198(4)                                                                         | 90                                                                      | 72.9520(10)                                                         | 90                                                                  | 83.4340(10)                                                           |
| <i>V, Å<sup>3</sup></i>                 | 3048.8(5)                                                        | 1541.8(2)                                                                         | 6636.74                                                                 | 8130.33                                                             | 11245.6                                                             | 7967.7(10)                                                            |
| <i>Z</i>                                | 8                                                                | 2                                                                                 | 4                                                                       | 4                                                                   | 8                                                                   | 4                                                                     |
| <i>ρ(calcd), g cm<sup>-3</sup></i>      | 2.451                                                            | 1.929                                                                             | 1.493                                                                   | 1.410                                                               | 1.562                                                               | 1.425                                                                 |
| <i>μ, mm<sup>-1</sup></i>               | 10.336                                                           | 15.359                                                                            | 3.108                                                                   | 2.533                                                               | 3.750                                                               | 2.664                                                                 |
| <i>Temp, K</i>                          | 100                                                              | 100.0                                                                             | 293                                                                     | 293                                                                 | 293                                                                 | 100.0                                                                 |
| <i>R(F), %<sup>a</sup></i>              | 2.25                                                             | 3.74                                                                              | 4.46                                                                    | 4.80                                                                | 5.26                                                                | 3.60                                                                  |
| <i>R(ωF<sup>2</sup>), %<sup>b</sup></i> | 4.88                                                             | 9.06                                                                              | 9.69                                                                    | 10.94                                                               | 11.98                                                               | 7.98                                                                  |

<sup>a</sup>  $R = \sum ||F_o| - |F_c|| / \sum |F_o|$  <sup>b</sup>  $R(\omega F^2) = \{ \sum [\omega(F_o^2 - F_c^2)^2] \} / \{ \sum [\omega(F_o^2)^2] \}^{1/2}$ ;  $\omega = 1 / [\sigma^2(F_o^2) + (aP)^2 + bP]$  with *a* and *b* given in CIF,  $P = [2F_c^2 + \max(F_o, 0)] / 3$

**Table S3:** All non-hydrogen bond distances (Å) of **1**.

| <b>Atom 1</b> | <b>Atom 2</b> | <b>Distance</b> |
|---------------|---------------|-----------------|
| Pt(1)         | Pt(1)#1       | 3.1747(4)       |
| Pt(1)         | V(1)          | 2.8635(6)       |
| Pt(1)         | S(1)          | 2.3249(9)       |
| Pt(1)         | S(3)          | 2.3236(8)       |
| Pt(1)         | S(2)          | 2.3190(8)       |
| Pt(1)         | S(4)          | 2.3239(8)       |
| V(1)          | O(3)          | 2.002(2)        |
| V(1)          | O(1)          | 1.992(2)        |
| V(1)          | O(2)          | 2.008(2)        |
| V(1)          | O(4)          | 2.003(2)        |
| V(1)          | O(5)          | 1.592(2)        |
| S(1)          | C(1)          | 1.700(4)        |
| S(3)          | C(5)          | 1.706(3)        |
| S(2)          | C(3)          | 1.701(3)        |
| S(4)          | C(7)          | 1.702(4)        |
| O(3)          | C(5)          | 1.253(4)        |
| O(1)          | C(1)          | 1.258(4)        |
| O(2)          | C(3)          | 1.257(4)        |
| O(4)          | C(7)          | 1.260(4)        |
| C(1)          | C(2)          | 1.499(5)        |
| C(6)          | C(5)          | 1.496(4)        |
| C(4)          | C(3)          | 1.500(4)        |
| C(8)          | C(7)          | 1.497(4)        |

**Table S4:** All non-hydrogen bond angles ( $^{\circ}$ ) of **1**.

| <b>Atom 1</b> | <b>Atom 2</b> | <b>Atom 3</b> | <b>Angle</b> |
|---------------|---------------|---------------|--------------|
| V(1)          | Pt(1)         | Pt(1)#1       | 177.168(11)  |
| S(1)          | Pt(1)         | Pt(1)#1       | 90.30(2)     |
| S(1)          | Pt(1)         | V(1)          | 90.11(2)     |
| S(3)          | Pt(1)         | Pt(1)#1       | 90.46(2)     |
| S(3)          | Pt(1)         | V(1)          | 89.14(3)     |
| S(3)          | Pt(1)         | S(1)          | 179.24(3)    |
| S(3)          | Pt(1)         | S(4)          | 90.89(3)     |
| S(2)          | Pt(1)         | Pt(1)#1       | 87.61(2)     |
| S(2)          | Pt(1)         | V(1)          | 89.59(3)     |
| S(2)          | Pt(1)         | S(1)          | 89.90(3)     |
| S(2)          | Pt(1)         | S(3)          | 90.19(3)     |
| S(2)          | Pt(1)         | S(4)          | 178.78(3)    |
| S(4)          | Pt(1)         | Pt(1)#1       | 92.96(2)     |
| S(4)          | Pt(1)         | V(1)          | 89.85(2)     |
| S(4)          | Pt(1)         | S(1)          | 89.01(3)     |
| O(3)          | V(1)          | Pt(1)         | 82.13(7)     |
| O(3)          | V(1)          | O(2)          | 88.53(9)     |
| O(3)          | V(1)          | O(4)          | 88.73(9)     |
| O(1)          | V(1)          | Pt(1)         | 80.88(7)     |
| O(1)          | V(1)          | O(3)          | 162.99(11)   |
| O(1)          | V(1)          | O(2)          | 88.31(9)     |
| O(1)          | V(1)          | O(4)          | 89.31(9)     |
| O(2)          | V(1)          | Pt(1)         | 81.69(7)     |
| O(4)          | V(1)          | Pt(1)         | 80.91(7)     |
| O(4)          | V(1)          | O(2)          | 162.60(10)   |
| O(5)          | V(1)          | Pt(1)         | 179.64(9)    |
| O(5)          | V(1)          | O(3)          | 98.14(10)    |

|      |      |       |            |
|------|------|-------|------------|
| O(5) | V(1) | O(1)  | 98.84(11)  |
| O(5) | V(1) | O(2)  | 98.07(11)  |
| O(5) | V(1) | O(4)  | 99.33(11)  |
| C(1) | S(1) | Pt(1) | 103.56(12) |
| C(5) | S(3) | Pt(1) | 104.45(12) |
| C(3) | S(2) | Pt(1) | 104.53(11) |
| C(7) | S(4) | Pt(1) | 103.97(10) |
| C(5) | O(3) | V(1)  | 134.3(2)   |
| C(1) | O(1) | V(1)  | 136.4(2)   |
| C(3) | O(2) | V(1)  | 134.5(2)   |
| C(7) | O(4) | V(1)  | 134.5(2)   |
| O(1) | C(1) | S(1)  | 125.1(3)   |
| O(1) | C(1) | C(2)  | 117.1(3)   |
| C(2) | C(1) | S(1)  | 117.8(2)   |
| O(4) | C(7) | S(4)  | 124.9(3)   |
| O(4) | C(7) | C(8)  | 117.7(3)   |
| C(8) | C(7) | S(4)  | 117.4(2)   |
| O(3) | C(5) | S(3)  | 125.6(2)   |
| O(3) | C(5) | C(6)  | 117.1(3)   |
| C(6) | C(5) | S(3)  | 117.3(3)   |
| O(2) | C(3) | S(2)  | 125.4(2)   |
| O(2) | C(3) | C(4)  | 117.7(3)   |
| C(4) | C(3) | S(2)  | 116.9(3)   |

Symmetry transformations used to generate equivalent atoms:

#1  $-x+1,y,-z+3/2$

**Table S5:** All non-hydrogen bond distances (Å) of **2**.

| <b>Atom 1</b> | <b>Atom 2</b> | <b>Distance</b> |
|---------------|---------------|-----------------|
| Pt(1)         | V(1)          | 2.7823(10)      |
| Pt(1)         | S(3)          | 2.3247(14)      |
| Pt(1)         | S(1)          | 2.3203(14)      |
| Pt(1)         | S(1)#1        | 3.1266(14)      |
| Pt(1)         | S(2)          | 2.3228(13)      |
| Pt(1)         | S(4)          | 2.3220(13)      |
| V(1)          | O(4)          | 2.009(4)        |
| V(1)          | O(2)          | 2.019(4)        |
| V(1)          | O(3)          | 2.003(4)        |
| V(1)          | O(5)          | 1.581(4)        |
| V(1)          | O(1)          | 2.001(4)        |
| S(3)          | C(15)         | 1.710(6)        |
| S(1)          | C(1)          | 1.728(6)        |
| S(2)          | C(8)          | 1.722(6)        |
| S(4)          | C(22)         | 1.714(5)        |
| Cl(2)         | C(29)         | 1.751(9)        |
| Cl(1)         | C(29)         | 1.747(9)        |
| O(4)          | C(22)         | 1.259(7)        |
| O(2)          | C(8)          | 1.252(7)        |
| O(3)          | C(15)         | 1.266(7)        |
| O(1)          | C(1)          | 1.256(7)        |
| C(23)         | C(28)         | 1.386(8)        |
| C(23)         | C(24)         | 1.403(8)        |
| C(23)         | C(22)         | 1.484(8)        |
| C(1)          | C(2)          | 1.478(8)        |
| C(16)         | C(21)         | 1.398(8)        |
| C(16)         | C(17)         | 1.390(8)        |

|       |       |           |
|-------|-------|-----------|
| C(16) | C(15) | 1.485(8)  |
| C(18) | C(17) | 1.386(8)  |
| C(18) | C(19) | 1.376(9)  |
| C(21) | C(20) | 1.381(8)  |
| C(28) | C(27) | 1.383(8)  |
| C(20) | C(19) | 1.403(9)  |
| C(9)  | C(10) | 1.386(8)  |
| C(9)  | C(14) | 1.400(8)  |
| C(9)  | C(8)  | 1.489(7)  |
| C(4)  | C(3)  | 1.383(9)  |
| C(4)  | C(5)  | 1.362(10) |
| C(2)  | C(7)  | 1.403(8)  |
| C(2)  | C(3)  | 1.393(9)  |
| C(24) | C(25) | 1.374(9)  |
| C(26) | C(27) | 1.380(9)  |
| C(26) | C(25) | 1.395(10) |
| C(11) | C(10) | 1.395(8)  |
| C(11) | C(12) | 1.380(9)  |
| C(13) | C(14) | 1.394(9)  |
| C(13) | C(12) | 1.375(10) |
| C(7)  | C(6)  | 1.398(9)  |
| C(6)  | C(5)  | 1.383(10) |

**Table S6:** All non-hydrogen bond angles ( $^{\circ}$ ) of **2**.

| <b>Atom1</b> | <b>Atom2</b> | <b>Atom3</b> | <b>Angle</b> |
|--------------|--------------|--------------|--------------|
| V(1)         | Pt(1)        | S(1)#1       | 176.24(3)    |
| S(3)         | Pt(1)        | V(1)         | 90.24(4)     |
| S(3)         | Pt(1)        | S(1)#1       | 88.82(4)     |
| S(1)         | Pt(1)        | V(1)         | 89.31(4)     |
| S(1)         | Pt(1)        | S(3)         | 179.51(5)    |
| S(1)         | Pt(1)        | S(1)#1       | 91.61(4)     |
| S(1)         | Pt(1)        | S(2)         | 90.49(5)     |
| S(1)         | Pt(1)        | S(4)         | 90.03(5)     |
| S(2)         | Pt(1)        | V(1)         | 89.86(4)     |
| S(2)         | Pt(1)        | S(3)         | 89.31(5)     |
| S(2)         | Pt(1)        | S(1)#1       | 86.49(4)     |
| S(4)         | Pt(1)        | V(1)         | 90.67(4)     |
| S(4)         | Pt(1)        | S(3)         | 90.18(5)     |
| S(4)         | Pt(1)        | S(1)#1       | 92.97(4)     |
| S(4)         | Pt(1)        | S(2)         | 179.26(5)    |
| O(4)         | V(1)         | Pt(1)        | 81.49(11)    |
| O(4)         | V(1)         | O(2)         | 163.29(16)   |
| O(2)         | V(1)         | Pt(1)        | 81.89(11)    |
| O(3)         | V(1)         | Pt(1)        | 81.43(12)    |
| O(3)         | V(1)         | O(4)         | 87.87(16)    |
| O(3)         | V(1)         | O(2)         | 87.94(16)    |
| O(5)         | V(1)         | Pt(1)        | 179.79(16)   |
| O(5)         | V(1)         | O(4)         | 98.52(18)    |
| O(5)         | V(1)         | O(2)         | 98.09(18)    |
| O(5)         | V(1)         | O(3)         | 98.36(18)    |
| O(5)         | V(1)         | O(1)         | 98.19(18)    |
| O(1)         | V(1)         | Pt(1)        | 82.01(11)    |

|       |       |       |            |
|-------|-------|-------|------------|
| O(1)  | V(1)  | O(4)  | 90.92(16)  |
| O(1)  | V(1)  | O(2)  | 88.50(16)  |
| O(1)  | V(1)  | O(3)  | 163.39(17) |
| C(15) | S(3)  | Pt(1) | 103.0(2)   |
| C(1)  | S(1)  | Pt(1) | 103.7(2)   |
| C(8)  | S(2)  | Pt(1) | 103.02(19) |
| C(22) | S(4)  | Pt(1) | 102.79(19) |
| C(22) | O(4)  | V(1)  | 132.6(4)   |
| C(8)  | O(2)  | V(1)  | 133.8(4)   |
| C(15) | O(3)  | V(1)  | 133.2(4)   |
| C(1)  | O(1)  | V(1)  | 133.6(4)   |
| C(28) | C(23) | C(24) | 119.4(5)   |
| C(28) | C(23) | C(22) | 119.0(5)   |
| C(24) | C(23) | C(22) | 121.5(5)   |
| O(1)  | C(1)  | S(1)  | 122.5(4)   |
| O(1)  | C(1)  | C(2)  | 118.3(5)   |
| C(2)  | C(1)  | S(1)  | 119.1(4)   |
| C(21) | C(16) | C(15) | 117.5(5)   |
| C(17) | C(16) | C(21) | 120.1(5)   |
| C(17) | C(16) | C(15) | 122.4(5)   |
| C(19) | C(18) | C(17) | 121.7(6)   |
| C(20) | C(21) | C(16) | 120.2(6)   |
| C(23) | C(28) | C(27) | 119.7(5)   |
| C(21) | C(20) | C(19) | 119.8(6)   |
| C(18) | C(17) | C(16) | 118.9(6)   |
| C(10) | C(9)  | C(14) | 119.6(5)   |
| C(10) | C(9)  | C(8)  | 118.5(5)   |
| C(14) | C(9)  | C(8)  | 121.9(5)   |
| C(5)  | C(4)  | C(3)  | 120.1(7)   |



|       |       |       |          |
|-------|-------|-------|----------|
| C(7)  | C(2)  | C(1)  | 122.5(6) |
| C(3)  | C(2)  | C(1)  | 117.7(5) |
| C(3)  | C(2)  | C(7)  | 119.8(5) |
| C(18) | C(19) | C(20) | 119.2(5) |
| C(25) | C(24) | C(23) | 120.2(6) |
| C(27) | C(26) | C(25) | 119.2(6) |
| C(26) | C(27) | C(28) | 121.1(6) |
| C(24) | C(25) | C(26) | 120.3(6) |
| C(12) | C(11) | C(10) | 120.4(6) |
| C(12) | C(13) | C(14) | 120.0(6) |
| C(9)  | C(10) | C(11) | 119.7(6) |
| C(13) | C(14) | C(9)  | 120.0(6) |
| C(13) | C(12) | C(11) | 120.4(6) |
| O(2)  | C(8)  | S(2)  | 123.6(4) |
| O(2)  | C(8)  | C(9)  | 117.5(5) |
| C(9)  | C(8)  | S(2)  | 118.9(4) |
| O(4)  | C(22) | S(4)  | 124.2(4) |
| O(4)  | C(22) | C(23) | 117.4(5) |
| C(23) | C(22) | S(4)  | 118.3(4) |
| C(6)  | C(7)  | C(2)  | 118.9(6) |
| C(4)  | C(3)  | C(2)  | 120.2(6) |
| C(5)  | C(6)  | C(7)  | 119.9(6) |
| C(4)  | C(5)  | C(6)  | 121.1(6) |
| Cl(1) | C(29) | Cl(2) | 113.0(5) |
| O(3)  | C(15) | S(3)  | 123.6(4) |
| O(3)  | C(15) | C(16) | 117.3(5) |
| C(16) | C(15) | S(3)  | 119.1(4) |

Symmetry transformations used to generate equivalent atoms:

#1 -x+1,-y+1,-z+1

**Table S7:** All non-hydrogen bond distances (Å) of **3Ce**.

| <b>Atom1</b> | <b>Atom2</b> | <b>Length</b> |
|--------------|--------------|---------------|
| Pt1          | V1           | 2.768(1)      |
| Pt1          | S1           | 2.296(2)      |
| Pt1          | S4           | 2.311(2)      |
| Pt1          | S3           | 2.296(3)      |
| Pt1          | S2           | 2.297(3)      |
| Ce1          | O7           | 2.220(4)      |
| Ce1          | O5           | 2.455(4)      |
| Ce1          | O8           | 2.205(4)      |
| Ce1          | O6           | 2.182(4)      |
| V1           | O5           | 1.630(3)      |
| V1           | O4           | 1.990(5)      |
| V1           | O1           | 1.972(4)      |
| V1           | O2           | 1.978(5)      |
| V1           | O3           | 2.001(4)      |
| S1           | C1           | 1.683(7)      |
| S4           | C7           | 1.689(7)      |
| S3           | C5           | 1.688(8)      |
| S2           | C3           | 1.675(8)      |
| O7           | C23          | 1.341(6)      |
| O8           | C37          | 1.359(7)      |
| O4           | C7           | 1.231(8)      |
| O1           | C1           | 1.240(7)      |
| O2           | C3           | 1.244(9)      |
| O3           | C5           | 1.232(9)      |
| O6           | C9           | 1.345(6)      |
| C28          | C23          | 1.424(9)      |
| C28          | C33          | 1.53(1)       |

|     |     |          |
|-----|-----|----------|
| C28 | C27 | 1.391(8) |
| C23 | C24 | 1.432(9) |
| C31 | C29 | 1.53(1)  |
| C7  | C8  | 1.49(1)  |
| C1  | C2  | 1.490(9) |
| C26 | C27 | 1.380(9) |
| C26 | C25 | 1.366(9) |
| C42 | C41 | 1.39(1)  |
| C42 | C37 | 1.423(9) |
| C42 | C47 | 1.54(1)  |
| C33 | C36 | 1.47(1)  |
| C33 | C34 | 1.53(1)  |
| C33 | C35 | 1.53(1)  |
| C41 | C40 | 1.36(1)  |
| C29 | C24 | 1.524(9) |
| C29 | C32 | 1.545(9) |
| C29 | C30 | 1.55(1)  |
| C24 | C25 | 1.387(8) |
| C39 | C38 | 1.39(1)  |
| C39 | C40 | 1.37(1)  |
| C37 | C38 | 1.42(1)  |
| C38 | C43 | 1.52(1)  |
| C3  | C4  | 1.51(1)  |
| C5  | C6  | 1.51(1)  |
| C50 | C47 | 1.55(1)  |
| C47 | C49 | 1.53(1)  |
| C47 | C48 | 1.55(1)  |
| C18 | C15 | 1.53(2)  |
| C43 | C45 | 1.53(1)  |

|     |     |          |
|-----|-----|----------|
| C43 | C44 | 1.53(1)  |
| C43 | C46 | 1.53(1)  |
| C14 | C9  | 1.389(7) |
| C14 | C13 | 1.391(7) |
| C14 | C19 | 1.57(2)  |
| C9  | C10 | 1.39(1)  |
| C10 | C11 | 1.391(7) |
| C10 | C15 | 1.54(1)  |
| C11 | C12 | 1.389(7) |
| C12 | C13 | 1.39(1)  |
| C21 | C19 | 1.49(2)  |
| C22 | C19 | 1.56(1)  |
| C19 | C20 | 1.55(1)  |
| C15 | C16 | 1.48(2)  |
| C15 | C17 | 1.57(2)  |
| C54 | C55 | 1.39(1)  |
| C54 | C59 | 1.39(1)  |
| C54 | C60 | 1.45(1)  |
| C55 | C56 | 1.39(1)  |
| C56 | C57 | 1.39(1)  |
| C57 | C58 | 1.39(1)  |
| C58 | C59 | 1.39(1)  |
| Si1 | C51 | 1.71(2)  |
| Si1 | C52 | 1.96(5)  |
| Si1 | C53 | 1.77(3)  |
| Si1 | O9  | 1.62(2)  |
| Si1 | O9  | 1.95(3)  |
| O9  | Si1 | 1.95(3)  |
| O9  | O9  | 1.59(5)  |

|     |     |         |
|-----|-----|---------|
| Si1 | C51 | 1.71(2) |
| Si1 | C52 | 1.96(5) |
| Si1 | C53 | 1.77(3) |
| Si1 | O9  | 1.62(2) |

**Table S8:** All non-hydrogen bond angles ( $^{\circ}$ ) of **3Ce**.

| <b>Atom1</b> | <b>Atom2</b> | <b>Atom3</b> | <b>Angle</b> |
|--------------|--------------|--------------|--------------|
| V1           | Pt1          | S1           | 91.03(5)     |
| V1           | Pt1          | S4           | 90.73(6)     |
| V1           | Pt1          | S3           | 90.48(7)     |
| V1           | Pt1          | S2           | 89.79(7)     |
| S1           | Pt1          | S4           | 88.99(8)     |
| S1           | Pt1          | S3           | 177.82(9)    |
| S1           | Pt1          | S2           | 89.29(9)     |
| S4           | Pt1          | S3           | 89.43(9)     |
| S4           | Pt1          | S2           | 178.21(9)    |
| S3           | Pt1          | S2           | 92.3(1)      |
| O7           | Ce1          | O5           | 101.8(1)     |
| O7           | Ce1          | O8           | 109.9(1)     |
| O7           | Ce1          | O6           | 129.7(2)     |
| O5           | Ce1          | O8           | 114.8(1)     |
| O5           | Ce1          | O6           | 86.9(2)      |
| O8           | Ce1          | O6           | 110.6(2)     |
| Pt1          | V1           | O5           | 178.6(1)     |
| Pt1          | V1           | O4           | 83.1(1)      |
| Pt1          | V1           | O1           | 82.8(1)      |
| Pt1          | V1           | O2           | 84.4(1)      |
| Pt1          | V1           | O3           | 83.7(1)      |
| O5           | V1           | O4           | 95.6(2)      |
| O5           | V1           | O1           | 97.6(2)      |
| O5           | V1           | O2           | 96.9(2)      |
| O5           | V1           | O3           | 95.9(2)      |
| O4           | V1           | O1           | 88.9(2)      |
| O4           | V1           | O2           | 167.5(2)     |

|     |     |     |          |
|-----|-----|-----|----------|
| O4  | V1  | O3  | 89.5(2)  |
| O1  | V1  | O2  | 89.6(2)  |
| O1  | V1  | O3  | 166.5(2) |
| O2  | V1  | O3  | 89.1(2)  |
| Pt1 | S1  | C1  | 104.5(2) |
| Pt1 | S4  | C7  | 104.7(2) |
| Pt1 | S3  | C5  | 105.2(3) |
| Pt1 | S2  | C3  | 106.0(3) |
| Ce1 | O7  | C23 | 163.4(3) |
| Ce1 | O5  | V1  | 163.7(2) |
| Ce1 | O8  | C37 | 168.8(4) |
| V1  | O4  | C7  | 136.4(4) |
| V1  | O1  | C1  | 136.7(4) |
| V1  | O2  | C3  | 134.9(5) |
| V1  | O3  | C5  | 134.7(5) |
| Ce1 | O6  | C9  | 173.3(4) |
| C23 | C28 | C33 | 122.7(6) |
| C23 | C28 | C27 | 118.1(6) |
| C33 | C28 | C27 | 118.9(6) |
| O7  | C23 | C28 | 120.9(5) |
| O7  | C23 | C24 | 119.7(5) |
| C28 | C23 | C24 | 119.3(5) |
| S4  | C7  | O4  | 124.3(5) |
| S4  | C7  | C8  | 118.3(5) |
| O4  | C7  | C8  | 117.4(6) |
| S1  | C1  | O1  | 124.3(5) |
| S1  | C1  | C2  | 117.7(5) |
| O1  | C1  | C2  | 118.0(6) |
| C27 | C26 | C25 | 120.0(6) |

|     |     |     |          |
|-----|-----|-----|----------|
| C41 | C42 | C37 | 117.9(6) |
| C41 | C42 | C47 | 118.8(6) |
| C37 | C42 | C47 | 123.1(6) |
| C28 | C33 | C36 | 114.5(7) |
| C28 | C33 | C34 | 106.8(6) |
| C28 | C33 | C35 | 111.0(7) |
| C36 | C33 | C34 | 111.3(7) |
| C36 | C33 | C35 | 109.4(7) |
| C34 | C33 | C35 | 103.3(7) |
| C42 | C41 | C40 | 122.4(7) |
| C31 | C29 | C24 | 111.9(5) |
| C31 | C29 | C32 | 110.8(5) |
| C31 | C29 | C30 | 106.1(5) |
| C24 | C29 | C32 | 108.5(5) |
| C24 | C29 | C30 | 112.4(5) |
| C32 | C29 | C30 | 107.0(5) |
| C28 | C27 | C26 | 121.9(6) |
| C23 | C24 | C29 | 121.9(5) |
| C23 | C24 | C25 | 118.7(5) |
| C29 | C24 | C25 | 119.3(5) |
| C26 | C25 | C24 | 121.6(5) |
| C38 | C39 | C40 | 122.4(7) |
| O8  | C37 | C42 | 119.4(5) |
| O8  | C37 | C38 | 120.3(5) |
| C42 | C37 | C38 | 120.3(6) |
| C39 | C38 | C37 | 117.5(6) |
| C39 | C38 | C43 | 119.2(6) |
| C37 | C38 | C43 | 123.3(6) |
| S2  | C3  | O2  | 124.5(6) |



|     |     |     |          |
|-----|-----|-----|----------|
| S2  | C3  | C4  | 118.8(6) |
| O2  | C3  | C4  | 116.7(7) |
| S3  | C5  | O3  | 125.0(6) |
| S3  | C5  | C6  | 116.9(6) |
| O3  | C5  | C6  | 118.1(7) |
| C41 | C40 | C39 | 119.5(7) |
| C42 | C47 | C50 | 109.2(6) |
| C42 | C47 | C49 | 113.0(6) |
| C42 | C47 | C48 | 112.9(6) |
| C50 | C47 | C49 | 110.3(6) |
| C50 | C47 | C48 | 105.2(6) |
| C49 | C47 | C48 | 105.9(7) |
| C38 | C43 | C45 | 109.0(7) |
| C38 | C43 | C44 | 109.9(7) |
| C38 | C43 | C46 | 113.7(7) |
| C45 | C43 | C44 | 112.2(8) |
| C45 | C43 | C46 | 106.8(8) |
| C44 | C43 | C46 | 105.2(8) |
| C9  | C14 | C13 | 120.0(5) |
| C9  | C14 | C19 | 121.9(6) |
| C13 | C14 | C19 | 117.8(6) |
| O6  | C9  | C14 | 122.6(5) |
| O6  | C9  | C10 | 117.3(5) |
| C14 | C9  | C10 | 120.0(5) |
| C9  | C10 | C11 | 120.0(5) |
| C9  | C10 | C15 | 123.0(6) |
| C11 | C10 | C15 | 116.9(6) |
| C10 | C11 | C12 | 120.0(5) |
| C14 | C19 | C21 | 109.2(8) |

|     |     |     |          |
|-----|-----|-----|----------|
| C14 | C19 | C22 | 111.4(9) |
| C14 | C19 | C20 | 110.1(9) |
| C21 | C19 | C22 | 108.2(9) |
| C21 | C19 | C20 | 112.9(9) |
| C22 | C19 | C20 | 105.0(9) |
| C18 | C15 | C10 | 112.5(9) |
| C18 | C15 | C16 | 107(1)   |
| C18 | C15 | C17 | 108(1)   |
| C10 | C15 | C16 | 116(1)   |
| C10 | C15 | C17 | 109(1)   |
| C16 | C15 | C17 | 104(1)   |
| C55 | C54 | C59 | 120.1(7) |
| C55 | C54 | C60 | 121.5(7) |
| C59 | C54 | C60 | 118.4(7) |
| C54 | C55 | C56 | 119.9(7) |
| C55 | C56 | C57 | 120.1(8) |
| C56 | C57 | C58 | 119.9(8) |
| C57 | C58 | C59 | 120.1(8) |
| C54 | C59 | C58 | 119.9(8) |
| C51 | Si1 | C52 | 94(1)    |
| C51 | Si1 | C53 | 114(1)   |
| C51 | Si1 | O9  | 127(1)   |
| C51 | Si1 | O9  | 99(1)    |
| C52 | Si1 | C53 | 125(2)   |
| C52 | Si1 | O9  | 87(2)    |
| C52 | Si1 | O9  | 136(2)   |
| C53 | Si1 | O9  | 108(2)   |
| C53 | Si1 | O9  | 87(1)    |
| O9  | Si1 | O9  | 52(1)    |

|     |     |     |        |
|-----|-----|-----|--------|
| Si1 | O9  | Si1 | 128(2) |
| Si1 | O9  | O9  | 75(2)  |
| Si1 | O9  | O9  | 53(2)  |
| O9  | Si1 | C51 | 99(1)  |
| O9  | Si1 | C52 | 136(2) |
| O9  | Si1 | C53 | 87(1)  |
| O9  | Si1 | O9  | 52(1)  |
| C51 | Si1 | C52 | 94(1)  |
| C51 | Si1 | C53 | 114(1) |
| C51 | Si1 | O9  | 127(1) |
| C52 | Si1 | C53 | 125(2) |
| C52 | Si1 | O9  | 87(2)  |
| C53 | Si1 | O9  | 108(2) |
| Si1 | O9  | O9  | 53(2)  |
| Si1 | O9  | Si1 | 128(2) |
| O9  | O9  | Si1 | 75(2)  |

**Table S9:** All non-hydrogen bond distances (Å) of **4Ce**.

| <b>Atom 1</b> | <b>Atom 2</b> | <b>Length</b> |
|---------------|---------------|---------------|
| Pt2           | V2            | 2.7653(9)     |
| Pt2           | S7            | 2.329(2)      |
| Pt2           | S8            | 2.322(1)      |
| Pt2           | S5            | 2.313(2)      |
| Pt2           | S6            | 2.326(1)      |
| Ce2           | O13           | 2.531(3)      |
| Ce2           | O15           | 2.218(3)      |
| Ce2           | O14           | 2.212(4)      |
| Ce2           | O16           | 2.173(4)      |
| V2            | O9            | 1.983(4)      |
| V2            | O13           | 1.616(3)      |
| V2            | O12           | 1.985(3)      |
| V2            | O11           | 1.982(4)      |
| V2            | O10           | 1.996(3)      |
| S7            | C85           | 1.699(5)      |
| S8            | C92           | 1.714(4)      |
| S5            | C71           | 1.705(4)      |
| S6            | C78           | 1.709(5)      |
| O9            | C71           | 1.268(6)      |
| O12           | C92           | 1.265(5)      |
| O11           | C85           | 1.266(6)      |
| O15           | C113          | 1.352(5)      |
| O10           | C78           | 1.255(5)      |
| O14           | C99           | 1.347(7)      |
| O16           | C127          | 1.304(8)      |
| C85           | C86           | 1.480(8)      |
| C113          | C118          | 1.416(6)      |

|      |      |          |
|------|------|----------|
| C113 | C114 | 1.431(6) |
| C71  | C72  | 1.474(8) |
| C92  | C93  | 1.473(8) |
| C86  | C87  | 1.391(7) |
| C86  | C91  | 1.389(8) |
| C121 | C119 | 1.531(8) |
| C118 | C123 | 1.550(8) |
| C118 | C117 | 1.387(7) |
| C99  | C100 | 1.42(1)  |
| C99  | C104 | 1.436(7) |
| C72  | C77  | 1.39(1)  |
| C72  | C73  | 1.382(8) |
| C87  | H87  | 0.93     |
| C87  | C88  | 1.38(1)  |
| C114 | C119 | 1.541(6) |
| C114 | C115 | 1.401(6) |
| C100 | C101 | 1.396(8) |
| C100 | C105 | 1.522(7) |
| C93  | C94  | 1.406(8) |
| C93  | C98  | 1.38(1)  |
| C78  | C79  | 1.498(8) |
| C79  | C84  | 1.371(9) |
| C79  | C80  | 1.395(9) |
| C127 | C132 | 1.44(1)  |
| C127 | C128 | 1.41(1)  |
| C122 | C119 | 1.54(1)  |
| C101 | C102 | 1.382(8) |
| C108 | C105 | 1.54(1)  |
| C123 | C126 | 1.536(9) |

|      |      |          |
|------|------|----------|
| C123 | C125 | 1.54(1)  |
| C123 | C124 | 1.536(9) |
| C105 | C106 | 1.54(1)  |
| C105 | C107 | 1.545(9) |
| C94  | C95  | 1.39(1)  |
| C119 | C120 | 1.540(8) |
| C91  | C90  | 1.38(1)  |
| C137 | C140 | 1.53(1)  |
| C137 | C132 | 1.51(1)  |
| C137 | C139 | 1.514(9) |
| C137 | C138 | 1.559(9) |
| C88  | C89  | 1.378(9) |
| C98  | C97  | 1.392(9) |
| C84  | C83  | 1.390(9) |
| C77  | C76  | 1.38(1)  |
| C104 | C109 | 1.54(1)  |
| C104 | C103 | 1.39(1)  |
| C73  | C74  | 1.38(1)  |
| C132 | C131 | 1.41(1)  |
| C109 | C112 | 1.502(9) |
| C109 | C111 | 1.49(1)  |
| C109 | C110 | 1.575(9) |
| C96  | C95  | 1.36(1)  |
| C96  | C97  | 1.38(1)  |
| C89  | H89  | 0.93     |
| C89  | C90  | 1.38(1)  |
| C103 | C102 | 1.37(1)  |
| C75  | C76  | 1.368(9) |
| C75  | C74  | 1.37(1)  |

|      |      |           |
|------|------|-----------|
| C128 | C133 | 1.53(1)   |
| C128 | C129 | 1.40(1)   |
| C133 | C136 | 1.50(1)   |
| C133 | C134 | 1.56(1)   |
| C133 | C135 | 1.52(2)   |
| C82  | C81  | 1.38(1)   |
| C80  | C81  | 1.38(1)   |
| C131 | C130 | 1.40(1)   |
| C129 | C130 | 1.39(1)   |
| Pt1  | V1   | 2.7878(9) |
| Pt1  | S1   | 2.306(2)  |
| Pt1  | S2   | 2.303(2)  |
| Pt1  | S4   | 2.307(2)  |
| Pt1  | S3   | 2.301(3)  |
| Ce1  | O8   | 2.216(4)  |
| Ce1  | O7   | 2.212(3)  |
| Ce1  | O6   | 2.171(4)  |
| Ce1  | O5   | 2.525(3)  |
| V1   | O5   | 1.628(3)  |
| V1   | O3   | 1.972(4)  |
| V1   | O4   | 1.964(4)  |
| V1   | O2   | 1.954(4)  |
| V1   | O1   | 1.961(6)  |
| S1   | C1   | 1.671(5)  |
| S2   | C8   | 1.676(5)  |
| S4   | C22  | 1.682(5)  |
| S3   | C15  | 1.670(5)  |
| O8   | C57  | 1.345(7)  |
| O7   | C43  | 1.347(5)  |

|     |     |          |
|-----|-----|----------|
| O6  | C29 | 1.356(7) |
| O3  | C15 | 1.256(6) |
| O4  | C22 | 1.242(5) |
| O2  | C8  | 1.243(6) |
| O1  | C1  | 1.237(7) |
| C57 | C58 | 1.426(8) |
| C57 | C62 | 1.428(7) |
| C58 | C59 | 1.393(8) |
| C58 | C63 | 1.544(6) |
| C15 | C16 | 1.470(9) |
| C43 | C44 | 1.411(8) |
| C43 | C48 | 1.438(8) |
| C29 | C34 | 1.425(8) |
| C29 | C30 | 1.43(1)  |
| C8  | C9  | 1.479(8) |
| C22 | C23 | 1.485(6) |
| C1  | C2  | 1.476(9) |
| C2  | C7  | 1.399(9) |
| C2  | C3  | 1.395(8) |
| C59 | C60 | 1.388(7) |
| C63 | C65 | 1.54(1)  |
| C63 | C64 | 1.54(1)  |
| C63 | C66 | 1.546(9) |
| C23 | C28 | 1.388(6) |
| C23 | C24 | 1.392(8) |
| C9  | C10 | 1.380(8) |
| C9  | C14 | 1.390(9) |
| C16 | C21 | 1.391(9) |
| C16 | C17 | 1.39(1)  |



|     |     |          |
|-----|-----|----------|
| C34 | C39 | 1.55(1)  |
| C34 | C33 | 1.39(1)  |
| C44 | C49 | 1.554(9) |
| C44 | C45 | 1.387(7) |
| C55 | C53 | 1.53(1)  |
| C48 | C47 | 1.406(7) |
| C48 | C53 | 1.530(9) |
| C62 | C67 | 1.54(1)  |
| C62 | C61 | 1.41(1)  |
| C52 | C49 | 1.516(8) |
| C49 | C51 | 1.54(1)  |
| C49 | C50 | 1.536(9) |
| C7  | C6  | 1.37(1)  |
| C28 | C27 | 1.374(8) |
| C45 | C46 | 1.385(9) |
| C60 | C61 | 1.39(1)  |
| C3  | C4  | 1.38(1)  |
| C37 | C35 | 1.54(1)  |
| C35 | C30 | 1.524(9) |
| C35 | C36 | 1.547(8) |
| C35 | C38 | 1.53(1)  |
| C10 | C11 | 1.37(1)  |
| C67 | C68 | 1.53(1)  |
| C67 | C69 | 1.522(9) |
| C67 | C70 | 1.552(8) |
| C47 | C46 | 1.367(9) |
| C21 | C20 | 1.38(1)  |
| C39 | C40 | 1.54(1)  |
| C39 | C41 | 1.542(8) |

|      |      |          |
|------|------|----------|
| C39  | C42  | 1.536(9) |
| C30  | C31  | 1.39(1)  |
| C33  | C32  | 1.36(1)  |
| C27  | C26  | 1.362(8) |
| C53  | C54  | 1.55(1)  |
| C53  | C56  | 1.548(9) |
| C6   | C5   | 1.373(9) |
| C19  | C20  | 1.37(1)  |
| C19  | C18  | 1.365(9) |
| C4   | C5   | 1.38(1)  |
| C14  | C13  | 1.38(1)  |
| C26  | C25  | 1.37(1)  |
| C12  | C11  | 1.37(1)  |
| C12  | C13  | 1.38(1)  |
| C17  | C18  | 1.40(1)  |
| C24  | C25  | 1.38(1)  |
| C32  | C31  | 1.38(1)  |
| C156 | C155 | 1.36(1)  |
| C156 | C157 | 1.39(1)  |
| C160 | C155 | 1.38(1)  |
| C160 | C159 | 1.37(1)  |
| C155 | C161 | 1.49(1)  |
| C158 | C157 | 1.35(1)  |
| C158 | C159 | 1.41(1)  |
| C142 | C143 | 1.34(1)  |
| C142 | C141 | 1.40(1)  |
| C143 | C144 | 1.46(2)  |
| C141 | C146 | 1.37(2)  |
| C141 | C147 | 1.43(1)  |

|      |      |         |
|------|------|---------|
| C146 | C145 | 1.38(2) |
| C144 | C145 | 1.32(2) |
| C149 | C148 | 1.41(2) |
| C149 | C150 | 1.35(2) |
| C152 | C153 | 1.32(2) |
| C152 | C151 | 1.37(2) |
| C148 | C153 | 1.33(2) |
| C148 | C154 | 1.50(2) |
| C150 | C151 | 1.44(2) |
| C163 | C164 | 1.36(2) |
| C163 | C162 | 1.39(2) |
| C164 | C162 | 1.42(1) |
| C162 | C165 | 1.23(3) |
| C162 | C164 | 1.42(1) |
| C163 | C164 | 1.36(2) |
| C163 | C162 | 1.39(2) |
| C162 | C165 | 1.23(3) |

**Table S10:** All non-hydrogen bond angles ( $^{\circ}$ ) of **4Ce**.

| <b>Atom 1</b> | <b>Atom 2</b> | <b>Atom 3</b> | <b>Angle</b> |
|---------------|---------------|---------------|--------------|
| V2            | Pt2           | S7            | 90.20(4)     |
| V2            | Pt2           | S8            | 90.56(4)     |
| V2            | Pt2           | S5            | 90.47(4)     |
| V2            | Pt2           | S6            | 90.58(4)     |
| S7            | Pt2           | S8            | 88.55(5)     |
| S7            | Pt2           | S5            | 179.33(6)    |
| S7            | Pt2           | S6            | 89.54(5)     |
| S8            | Pt2           | S5            | 91.42(5)     |
| S8            | Pt2           | S6            | 177.78(6)    |
| S5            | Pt2           | S6            | 90.48(5)     |
| O13           | Ce2           | O15           | 114.3(1)     |
| O13           | Ce2           | O14           | 88.0(1)      |
| O13           | Ce2           | O16           | 115.3(1)     |
| O15           | Ce2           | O14           | 131.3(1)     |
| O15           | Ce2           | O16           | 99.4(1)      |
| O14           | Ce2           | O16           | 109.4(1)     |
| Pt2           | V2            | O9            | 81.9(1)      |
| Pt2           | V2            | O13           | 179.4(1)     |
| Pt2           | V2            | O12           | 81.6(1)      |
| Pt2           | V2            | O11           | 82.3(1)      |
| Pt2           | V2            | O10           | 82.1(1)      |
| O9            | V2            | O13           | 97.5(2)      |
| O9            | V2            | O12           | 91.3(1)      |
| O9            | V2            | O11           | 164.1(2)     |
| O9            | V2            | O10           | 89.9(1)      |
| O13           | V2            | O12           | 98.6(2)      |
| O13           | V2            | O11           | 98.3(2)      |

|      |      |      |          |
|------|------|------|----------|
| O13  | V2   | O10  | 97.7(2)  |
| O12  | V2   | O11  | 85.4(1)  |
| O12  | V2   | O10  | 163.3(1) |
| O11  | V2   | O10  | 88.9(1)  |
| Pt2  | S7   | C85  | 103.5(2) |
| Pt2  | S8   | C92  | 101.9(2) |
| Pt2  | S5   | C71  | 103.3(2) |
| Pt2  | S6   | C78  | 102.9(2) |
| V2   | O9   | C71  | 134.4(3) |
| Ce2  | O13  | V2   | 175.8(2) |
| V2   | O12  | C92  | 135.5(3) |
| V2   | O11  | C85  | 134.0(3) |
| Ce2  | O15  | C113 | 168.0(3) |
| V2   | O10  | C78  | 132.9(3) |
| Ce2  | O14  | C99  | 167.7(3) |
| Ce2  | O16  | C127 | 173.7(4) |
| S7   | C85  | O11  | 123.4(4) |
| S7   | C85  | C86  | 119.6(4) |
| O11  | C85  | C86  | 117.0(4) |
| O15  | C113 | C118 | 121.0(4) |
| O15  | C113 | C114 | 119.4(4) |
| C118 | C113 | C114 | 119.6(4) |
| S5   | C71  | O9   | 123.2(4) |
| S5   | C71  | C72  | 119.0(4) |
| O9   | C71  | C72  | 117.8(4) |
| S8   | C92  | O12  | 123.3(4) |
| S8   | C92  | C93  | 118.9(4) |
| O12  | C92  | C93  | 117.8(4) |
| C85  | C86  | C87  | 122.6(4) |

|      |      |      |          |
|------|------|------|----------|
| C85  | C86  | C91  | 118.5(5) |
| C87  | C86  | C91  | 118.8(5) |
| C113 | C118 | C123 | 121.6(5) |
| C113 | C118 | C117 | 118.1(5) |
| C123 | C118 | C117 | 120.3(5) |
| O14  | C99  | C100 | 119.4(5) |
| O14  | C99  | C104 | 120.1(5) |
| C100 | C99  | C104 | 120.5(5) |
| C71  | C72  | C77  | 122.8(5) |
| C71  | C72  | C73  | 119.0(5) |
| C77  | C72  | C73  | 118.1(6) |
| C86  | C87  | C88  | 120.3(5) |
| C113 | C114 | C119 | 121.1(4) |
| C113 | C114 | C115 | 118.4(5) |
| C119 | C114 | C115 | 120.5(5) |
| C99  | C100 | C101 | 118.2(5) |
| C99  | C100 | C105 | 121.5(5) |
| C101 | C100 | C105 | 120.3(5) |
| C92  | C93  | C94  | 121.8(5) |
| C92  | C93  | C98  | 118.9(5) |
| C94  | C93  | C98  | 119.3(6) |
| S6   | C78  | O10  | 124.1(4) |
| S6   | C78  | C79  | 118.2(4) |
| O10  | C78  | C79  | 117.7(5) |
| C78  | C79  | C84  | 119.2(6) |
| C78  | C79  | C80  | 122.0(6) |
| C84  | C79  | C80  | 118.5(7) |
| O16  | C127 | C132 | 119.6(6) |
| O16  | C127 | C128 | 119.3(6) |

|      |      |      |          |
|------|------|------|----------|
| C132 | C127 | C128 | 120.7(7) |
| C100 | C101 | C102 | 121.6(6) |
| C118 | C123 | C126 | 110.4(5) |
| C118 | C123 | C125 | 110.6(5) |
| C118 | C123 | C124 | 112.2(5) |
| C126 | C123 | C125 | 109.9(5) |
| C126 | C123 | C124 | 106.0(5) |
| C125 | C123 | C124 | 107.5(5) |
| C100 | C105 | C108 | 111.1(5) |
| C100 | C105 | C106 | 113.1(5) |
| C100 | C105 | C107 | 108.7(5) |
| C108 | C105 | C106 | 106.5(5) |
| C108 | C105 | C107 | 111.4(5) |
| C106 | C105 | C107 | 105.9(5) |
| C93  | C94  | C95  | 119.4(6) |
| C121 | C119 | C114 | 110.5(4) |
| C121 | C119 | C122 | 112.2(5) |
| C121 | C119 | C120 | 106.1(5) |
| C114 | C119 | C122 | 109.4(5) |
| C114 | C119 | C120 | 112.4(5) |
| C122 | C119 | C120 | 106.2(5) |
| C86  | C91  | C90  | 121.1(6) |
| C140 | C137 | C132 | 117.4(6) |
| C140 | C137 | C139 | 108.4(6) |
| C140 | C137 | C138 | 105.2(6) |
| C132 | C137 | C139 | 111.1(6) |
| C132 | C137 | C138 | 107.8(6) |
| C139 | C137 | C138 | 106.3(6) |
| C87  | C88  | C89  | 120.1(6) |

|      |      |      |          |
|------|------|------|----------|
| C118 | C117 | C116 | 122.7(6) |
| C114 | C115 | C116 | 122.0(6) |
| C93  | C98  | C97  | 120.7(6) |
| C79  | C84  | C83  | 121.2(6) |
| C72  | C77  | C76  | 121.3(6) |
| C99  | C104 | C109 | 122.6(5) |
| C99  | C104 | C103 | 117.0(5) |
| C109 | C104 | C103 | 120.3(6) |
| C72  | C73  | C74  | 120.5(6) |
| C127 | C132 | C137 | 128.4(7) |
| C127 | C132 | C131 | 116.4(7) |
| C137 | C132 | C131 | 114.9(7) |
| C104 | C109 | C112 | 110.2(6) |
| C104 | C109 | C111 | 111.9(6) |
| C104 | C109 | C110 | 110.9(6) |
| C112 | C109 | C111 | 114.2(6) |
| C112 | C109 | C110 | 104.1(6) |
| C111 | C109 | C110 | 105.1(6) |
| C95  | C96  | C97  | 121.7(7) |
| C88  | C89  | C90  | 120.4(7) |
| C91  | C90  | C89  | 119.3(6) |
| C117 | C116 | C115 | 119.2(6) |
| C104 | C103 | C102 | 123.3(6) |
| C76  | C75  | C74  | 120.2(6) |
| C77  | C76  | C75  | 119.4(6) |
| C73  | C74  | C75  | 120.4(6) |
| C101 | C102 | C103 | 119.4(6) |
| C84  | C83  | C82  | 119.7(7) |
| C127 | C128 | C133 | 122.9(7) |



|      |      |      |           |
|------|------|------|-----------|
| C127 | C128 | C129 | 119.1(8)  |
| C133 | C128 | C129 | 118.0(8)  |
| C94  | C95  | C96  | 120.0(7)  |
| C128 | C133 | C136 | 112.2(7)  |
| C128 | C133 | C134 | 108.7(7)  |
| C128 | C133 | C135 | 113.9(7)  |
| C136 | C133 | C134 | 107.5(7)  |
| C136 | C133 | C135 | 109.3(7)  |
| C134 | C133 | C135 | 104.8(7)  |
| C98  | C97  | C96  | 118.9(7)  |
| C83  | C82  | C81  | 120.2(8)  |
| C79  | C80  | C81  | 121.0(7)  |
| C132 | C131 | C130 | 123.9(8)  |
| C128 | C129 | C130 | 122.2(9)  |
| C131 | C130 | C129 | 117.5(9)  |
| C82  | C81  | C80  | 119.4(8)  |
| V1   | Pt1  | S1   | 90.43(6)  |
| V1   | Pt1  | S2   | 90.37(6)  |
| V1   | Pt1  | S4   | 90.79(6)  |
| V1   | Pt1  | S3   | 90.74(7)  |
| S1   | Pt1  | S2   | 88.21(7)  |
| S1   | Pt1  | S4   | 89.27(7)  |
| S1   | Pt1  | S3   | 178.76(9) |
| S2   | Pt1  | S4   | 177.23(8) |
| S2   | Pt1  | S3   | 91.39(8)  |
| S4   | Pt1  | S3   | 91.11(9)  |
| O8   | Ce1  | O7   | 130.8(1)  |
| O8   | Ce1  | O6   | 109.9(1)  |
| O8   | Ce1  | O5   | 88.3(1)   |

|     |     |     |          |
|-----|-----|-----|----------|
| O7  | Ce1 | O6  | 99.8(1)  |
| O7  | Ce1 | O5  | 114.9(1) |
| O6  | Ce1 | O5  | 113.5(1) |
| Pt1 | V1  | O5  | 179.0(1) |
| Pt1 | V1  | O3  | 82.0(1)  |
| Pt1 | V1  | O4  | 82.1(1)  |
| Pt1 | V1  | O2  | 82.0(1)  |
| Pt1 | V1  | O1  | 81.9(2)  |
| O5  | V1  | O3  | 97.5(2)  |
| O5  | V1  | O4  | 97.1(2)  |
| O5  | V1  | O2  | 98.8(2)  |
| O5  | V1  | O1  | 98.6(2)  |
| O3  | V1  | O4  | 90.2(2)  |
| O3  | V1  | O2  | 91.1(2)  |
| O3  | V1  | O1  | 163.7(2) |
| O4  | V1  | O2  | 163.8(2) |
| O4  | V1  | O1  | 89.3(2)  |
| O2  | V1  | O1  | 85.0(2)  |
| Pt1 | S1  | C1  | 105.4(2) |
| Pt1 | S2  | C8  | 104.8(2) |
| Pt1 | S4  | C22 | 104.7(2) |
| Pt1 | S3  | C15 | 105.7(2) |
| Ce1 | O8  | C57 | 167.2(3) |
| Ce1 | O7  | C43 | 168.0(3) |
| Ce1 | O6  | C29 | 177.3(3) |
| Ce1 | O5  | V1  | 174.4(2) |
| V1  | O3  | C15 | 138.9(3) |
| V1  | O4  | C22 | 138.3(4) |
| V1  | O2  | C8  | 139.1(4) |

|     |     |     |          |
|-----|-----|-----|----------|
| V1  | O1  | C1  | 139.3(4) |
| O8  | C57 | C58 | 120.5(5) |
| O8  | C57 | C62 | 119.8(5) |
| C58 | C57 | C62 | 119.7(5) |
| C57 | C58 | C59 | 120.1(5) |
| C57 | C58 | C63 | 120.3(4) |
| C59 | C58 | C63 | 119.5(5) |
| S3  | C15 | O3  | 122.3(4) |
| S3  | C15 | C16 | 119.6(4) |
| O3  | C15 | C16 | 118.1(5) |
| O7  | C43 | C44 | 121.2(4) |
| O7  | C43 | C48 | 118.9(4) |
| C44 | C43 | C48 | 119.9(5) |
| O6  | C29 | C34 | 121.1(5) |
| O6  | C29 | C30 | 118.3(5) |
| C34 | C29 | C30 | 120.5(5) |
| S2  | C8  | O2  | 122.4(4) |
| S2  | C8  | C9  | 119.6(4) |
| O2  | C8  | C9  | 117.9(5) |
| S4  | C22 | O4  | 123.2(4) |
| S4  | C22 | C23 | 119.3(4) |
| O4  | C22 | C23 | 117.4(4) |
| S1  | C1  | O1  | 122.4(4) |
| S1  | C1  | C2  | 119.5(4) |
| O1  | C1  | C2  | 118.1(5) |
| C1  | C2  | C7  | 123.0(5) |
| C1  | C2  | C3  | 118.2(5) |
| C7  | C2  | C3  | 118.8(6) |
| C58 | C59 | C60 | 120.3(5) |

|     |     |     |          |
|-----|-----|-----|----------|
| C58 | C63 | C65 | 111.1(5) |
| C58 | C63 | C64 | 112.6(5) |
| C58 | C63 | C66 | 109.4(5) |
| C65 | C63 | C64 | 106.1(5) |
| C65 | C63 | C66 | 111.5(5) |
| C64 | C63 | C66 | 105.9(5) |
| C22 | C23 | C28 | 119.1(5) |
| C22 | C23 | C24 | 122.4(5) |
| C28 | C23 | C24 | 118.4(5) |
| C8  | C9  | C10 | 123.1(5) |
| C8  | C9  | C14 | 117.3(5) |
| C10 | C9  | C14 | 119.6(6) |
| C15 | C16 | C21 | 119.0(5) |
| C15 | C16 | C17 | 122.5(5) |
| C21 | C16 | C17 | 118.5(6) |
| C29 | C34 | C39 | 127.3(6) |
| C29 | C34 | C33 | 116.5(6) |
| C39 | C34 | C33 | 116.2(6) |
| C43 | C44 | C49 | 121.7(5) |
| C43 | C44 | C45 | 119.0(6) |
| C49 | C44 | C45 | 119.3(6) |
| C43 | C48 | C47 | 117.8(5) |
| C43 | C48 | C53 | 121.5(5) |
| C47 | C48 | C53 | 120.6(5) |
| C57 | C62 | C67 | 122.8(5) |
| C57 | C62 | C61 | 117.8(5) |
| C67 | C62 | C61 | 119.3(5) |
| C44 | C49 | C52 | 110.7(5) |
| C44 | C49 | C51 | 110.2(5) |

|     |     |     |          |
|-----|-----|-----|----------|
| C44 | C49 | C50 | 112.6(5) |
| C52 | C49 | C51 | 109.9(5) |
| C52 | C49 | C50 | 106.4(5) |
| C51 | C49 | C50 | 107.1(5) |
| C2  | C7  | C6  | 120.6(6) |
| C23 | C28 | C27 | 120.6(5) |
| C44 | C45 | C46 | 121.4(6) |
| C59 | C60 | C61 | 120.4(6) |
| C2  | C3  | C4  | 119.8(6) |
| C37 | C35 | C30 | 110.5(5) |
| C37 | C35 | C36 | 110.5(5) |
| C37 | C35 | C38 | 106.1(5) |
| C30 | C35 | C36 | 111.2(5) |
| C30 | C35 | C38 | 113.1(6) |
| C36 | C35 | C38 | 105.3(5) |
| C9  | C10 | C11 | 119.9(6) |
| C62 | C67 | C68 | 112.9(5) |
| C62 | C67 | C69 | 109.5(5) |
| C62 | C67 | C70 | 111.7(5) |
| C68 | C67 | C69 | 111.3(5) |
| C68 | C67 | C70 | 105.5(5) |
| C69 | C67 | C70 | 105.7(5) |
| C48 | C47 | C46 | 121.5(6) |
| C16 | C21 | C20 | 120.2(6) |
| C34 | C39 | C40 | 116.7(5) |
| C34 | C39 | C41 | 110.0(5) |
| C34 | C39 | C42 | 108.2(5) |
| C40 | C39 | C41 | 107.0(5) |
| C40 | C39 | C42 | 106.1(5) |

|     |     |     |          |
|-----|-----|-----|----------|
| C41 | C39 | C42 | 108.5(5) |
| C29 | C30 | C35 | 121.9(6) |
| C29 | C30 | C31 | 117.6(6) |
| C35 | C30 | C31 | 120.5(6) |
| C34 | C33 | C32 | 124.1(7) |
| C28 | C27 | C26 | 120.5(6) |
| C45 | C46 | C47 | 120.3(6) |
| C55 | C53 | C48 | 109.4(5) |
| C55 | C53 | C54 | 111.7(5) |
| C55 | C53 | C56 | 105.9(5) |
| C48 | C53 | C54 | 110.2(5) |
| C48 | C53 | C56 | 112.9(5) |
| C54 | C53 | C56 | 106.8(5) |
| C7  | C6  | C5  | 120.0(6) |
| C20 | C19 | C18 | 119.6(7) |
| C62 | C61 | C60 | 121.6(6) |
| C3  | C4  | C5  | 120.5(6) |
| C9  | C14 | C13 | 120.2(6) |
| C6  | C5  | C4  | 120.2(6) |
| C27 | C26 | C25 | 119.8(7) |
| C11 | C12 | C13 | 121.1(8) |
| C16 | C17 | C18 | 120.2(6) |
| C10 | C11 | C12 | 120.1(7) |
| C23 | C24 | C25 | 119.9(7) |
| C33 | C32 | C31 | 118.3(7) |
| C30 | C31 | C32 | 122.8(7) |
| C21 | C20 | C19 | 120.8(6) |
| C21 | C20 | H20 | 119.5    |
| C19 | C20 | H20 | 119.7    |

|      |      |      |          |
|------|------|------|----------|
| C19  | C18  | C17  | 120.5(7) |
| C14  | C13  | C12  | 119.1(7) |
| C26  | C25  | C24  | 120.8(8) |
| C155 | C156 | C157 | 121.2(7) |
| C155 | C160 | C159 | 120.3(8) |
| C156 | C155 | C160 | 118.5(7) |
| C156 | C155 | C161 | 121.3(7) |
| C160 | C155 | C161 | 120.1(7) |
| C157 | C158 | C159 | 117.8(8) |
| C156 | C157 | C158 | 120.9(7) |
| C160 | C159 | C158 | 121.2(9) |
| C143 | C142 | C141 | 118.5(9) |
| C142 | C143 | C144 | 123(1)   |
| C142 | C141 | C146 | 119.5(9) |
| C142 | C141 | C147 | 119.0(9) |
| C146 | C141 | C147 | 121.5(9) |
| C141 | C146 | C145 | 120(1)   |
| C143 | C144 | C145 | 114(1)   |
| C146 | C145 | C144 | 125(1)   |
| C148 | C149 | C150 | 121(1)   |
| C153 | C152 | C151 | 125(1)   |
| C149 | C148 | C153 | 118(1)   |
| C149 | C148 | C154 | 119(1)   |
| C153 | C148 | C154 | 123(1)   |
| C149 | C150 | C151 | 120(1)   |
| C152 | C153 | C148 | 121(1)   |
| C152 | C151 | C150 | 115(1)   |
| C164 | C163 | C162 | 120(1)   |
| C163 | C164 | C162 | 124.5(9) |

|      |      |      |          |
|------|------|------|----------|
| C163 | C162 | C165 | 116(1)   |
| C163 | C162 | C164 | 116(1)   |
| C165 | C162 | C164 | 128(1)   |
| C164 | C163 | C162 | 120(1)   |
| C162 | C164 | C163 | 124.5(9) |
| C164 | C162 | C163 | 116(1)   |
| C164 | C162 | C165 | 128(1)   |
| C163 | C162 | C165 | 116(1)   |



**Table S11:** All non-hydrogen bond distances (Å) of **3Nd**.

| <b>Atom 1</b> | <b>Atom 2</b> | <b>Length</b> |
|---------------|---------------|---------------|
| Pt1           | V1            | 2.762(1)      |
| Pt1           | S4            | 2.319(2)      |
| Pt1           | S3            | 2.321(2)      |
| Pt1           | S1            | 2.319(2)      |
| Pt1           | S2            | 2.316(3)      |
| Nd1           | O8            | 2.170(4)      |
| Nd1           | O7            | 2.164(5)      |
| Nd1           | O6            | 2.175(5)      |
| Nd1           | O5            | 2.438(5)      |
| V1            | O5            | 1.625(5)      |
| V1            | O3            | 1.980(6)      |
| V1            | O4            | 1.983(7)      |
| V1            | O2            | 1.980(6)      |
| V1            | O1            | 1.989(6)      |
| S4            | C7            | 1.682(9)      |
| S3            | C5            | 1.683(9)      |
| S1            | C1            | 1.676(8)      |
| S2            | C3            | 1.682(9)      |
| O8            | C37           | 1.359(9)      |
| O7            | C23           | 1.364(9)      |
| O6            | C9            | 1.363(8)      |
| O3            | C5            | 1.26(1)       |
| O4            | C7            | 1.27(1)       |
| O2            | C3            | 1.26(1)       |
| O1            | C1            | 1.26(1)       |
| C37           | C38           | 1.43(1)       |
| C37           | C42           | 1.42(1)       |

|     |     |         |
|-----|-----|---------|
| C41 | C42 | 1.38(1) |
| C41 | C40 | 1.38(1) |
| C38 | C39 | 1.39(1) |
| C38 | C43 | 1.54(1) |
| C39 | C40 | 1.37(1) |
| C42 | C47 | 1.55(1) |
| C32 | C29 | 1.54(1) |
| C7  | C8  | 1.50(1) |
| C5  | C6  | 1.49(1) |
| C44 | C43 | 1.52(1) |
| C3  | C4  | 1.50(1) |
| C23 | C24 | 1.42(1) |
| C23 | C28 | 1.42(1) |
| C43 | C46 | 1.53(1) |
| C43 | C45 | 1.52(1) |
| C9  | C10 | 1.42(1) |
| C9  | C14 | 1.41(1) |
| C15 | C10 | 1.53(1) |
| C15 | C18 | 1.52(1) |
| C15 | C16 | 1.53(1) |
| C15 | C17 | 1.52(2) |
| C10 | C11 | 1.39(1) |
| C29 | C24 | 1.54(1) |
| C29 | C31 | 1.53(1) |
| C29 | C30 | 1.55(1) |
| C33 | C28 | 1.54(1) |
| C33 | C34 | 1.54(1) |
| C33 | C35 | 1.51(1) |
| C33 | C36 | 1.54(1) |

|     |     |         |
|-----|-----|---------|
| C24 | C25 | 1.39(1) |
| C14 | C19 | 1.56(1) |
| C14 | C13 | 1.39(1) |
| C19 | C22 | 1.52(1) |
| C19 | C21 | 1.53(1) |
| C19 | C20 | 1.56(1) |
| C47 | C49 | 1.51(1) |
| C47 | C48 | 1.53(1) |
| C47 | C50 | 1.56(1) |
| C28 | C27 | 1.42(1) |
| C12 | C13 | 1.39(1) |
| C12 | C11 | 1.39(1) |
| C1  | C2  | 1.50(1) |
| C27 | C26 | 1.34(1) |
| C25 | C26 | 1.36(1) |

**Table S12:** All non-hydrogen bond angles ( $^{\circ}$ ) of **3Nd**.

| <b>Atom 1</b> | <b>Atom 2</b> | <b>Atom 3</b> | <b>Angle</b> |
|---------------|---------------|---------------|--------------|
| V1            | Pt1           | S4            | 90.15(7)     |
| V1            | Pt1           | S3            | 90.40(7)     |
| V1            | Pt1           | S1            | 90.04(7)     |
| V1            | Pt1           | S2            | 89.30(7)     |
| S4            | Pt1           | S3            | 92.00(9)     |
| S4            | Pt1           | S1            | 88.95(9)     |
| S4            | Pt1           | S2            | 178.17(9)    |
| S3            | Pt1           | S1            | 178.95(9)    |
| S3            | Pt1           | S2            | 89.74(9)     |
| S1            | Pt1           | S2            | 89.31(9)     |
| O8            | Nd1           | O7            | 113.9(2)     |
| O8            | Nd1           | O6            | 110.2(2)     |
| O8            | Nd1           | O5            | 97.1(2)      |
| O7            | Nd1           | O6            | 109.8(2)     |
| O7            | Nd1           | O5            | 106.9(2)     |
| O6            | Nd1           | O5            | 118.6(2)     |
| Pt1           | V1            | O5            | 176.7(2)     |
| Pt1           | V1            | O3            | 82.6(2)      |
| Pt1           | V1            | O4            | 83.1(2)      |
| Pt1           | V1            | O2            | 83.9(2)      |
| Pt1           | V1            | O1            | 83.3(2)      |
| O5            | V1            | O3            | 95.4(3)      |
| O5            | V1            | O4            | 94.5(3)      |
| O5            | V1            | O2            | 98.6(3)      |
| O5            | V1            | O1            | 98.8(3)      |
| O3            | V1            | O4            | 91.8(3)      |
| O3            | V1            | O2            | 89.3(2)      |

|     |     |     |          |
|-----|-----|-----|----------|
| O3  | V1  | O1  | 165.8(3) |
| O4  | V1  | O2  | 166.7(3) |
| O4  | V1  | O1  | 88.2(3)  |
| O2  | V1  | O1  | 87.6(2)  |
| Pt1 | S4  | C7  | 104.4(3) |
| Pt1 | S3  | C5  | 103.1(3) |
| Pt1 | S1  | C1  | 103.9(3) |
| Pt1 | S2  | C3  | 104.4(3) |
| Nd1 | O8  | C37 | 143.2(4) |
| Nd1 | O7  | C23 | 161.7(5) |
| Nd1 | O6  | C9  | 151.4(5) |
| Nd1 | O5  | V1  | 164.8(3) |
| V1  | O3  | C5  | 134.7(6) |
| V1  | O4  | C7  | 132.5(6) |
| V1  | O2  | C3  | 132.9(5) |
| V1  | O1  | C1  | 132.9(6) |
| O8  | C37 | C38 | 119.1(6) |
| O8  | C37 | C42 | 119.9(6) |
| C38 | C37 | C42 | 121.0(7) |
| C42 | C41 | C40 | 123.1(7) |
| C37 | C38 | C39 | 116.8(7) |
| C37 | C38 | C43 | 121.9(6) |
| C39 | C38 | C43 | 121.2(7) |
| C38 | C39 | C40 | 122.4(7) |
| C37 | C42 | C41 | 116.5(7) |
| C37 | C42 | C47 | 120.8(7) |
| C41 | C42 | C47 | 122.7(7) |
| S4  | C7  | O4  | 124.0(7) |
| S4  | C7  | C8  | 119.1(7) |

|     |     |     |          |
|-----|-----|-----|----------|
| O4  | C7  | C8  | 116.9(8) |
| S3  | C5  | O3  | 124.9(6) |
| S3  | C5  | C6  | 118.1(6) |
| O3  | C5  | C6  | 117.0(7) |
| S2  | C3  | O2  | 124.9(6) |
| S2  | C3  | C4  | 116.2(6) |
| O2  | C3  | C4  | 118.9(7) |
| O7  | C23 | C24 | 119.7(7) |
| O7  | C23 | C28 | 119.3(7) |
| C24 | C23 | C28 | 121.0(7) |
| C38 | C43 | C44 | 114.7(6) |
| C38 | C43 | C46 | 108.0(6) |
| C38 | C43 | C45 | 112.0(6) |
| C44 | C43 | C46 | 108.4(7) |
| C44 | C43 | C45 | 105.9(7) |
| C46 | C43 | C45 | 107.5(7) |
| C41 | C40 | C39 | 119.0(7) |
| C41 | C40 | H40 | 120.6    |
| C39 | C40 | H40 | 120.4    |
| O6  | C9  | C10 | 118.4(7) |
| O6  | C9  | C14 | 120.5(7) |
| C10 | C9  | C14 | 121.1(7) |
| C10 | C15 | C18 | 112.9(8) |
| C10 | C15 | C16 | 112.0(8) |
| C10 | C15 | C17 | 110.6(8) |
| C18 | C15 | C16 | 105.3(8) |
| C18 | C15 | C17 | 106.0(9) |
| C16 | C15 | C17 | 109.8(9) |
| C9  | C10 | C15 | 122.3(7) |

|     |     |     |          |
|-----|-----|-----|----------|
| C9  | C10 | C11 | 117.3(8) |
| C15 | C10 | C11 | 120.4(8) |
| C32 | C29 | C24 | 109.7(7) |
| C32 | C29 | C31 | 112.4(7) |
| C32 | C29 | C30 | 106.5(7) |
| C24 | C29 | C31 | 110.6(7) |
| C24 | C29 | C30 | 111.2(7) |
| C31 | C29 | C30 | 106.3(7) |
| C28 | C33 | C34 | 111.8(8) |
| C28 | C33 | C35 | 112.9(8) |
| C28 | C33 | C36 | 108.8(8) |
| C34 | C33 | C35 | 106.8(8) |
| C34 | C33 | C36 | 106.1(8) |
| C35 | C33 | C36 | 110.1(8) |
| C23 | C24 | C29 | 121.1(7) |
| C23 | C24 | C25 | 117.7(7) |
| C29 | C24 | C25 | 121.1(7) |
| C9  | C14 | C19 | 121.8(7) |
| C9  | C14 | C13 | 117.9(7) |
| C19 | C14 | C13 | 120.1(7) |
| C14 | C19 | C22 | 113.6(7) |
| C14 | C19 | C21 | 109.7(7) |
| C14 | C19 | C20 | 111.1(7) |
| C22 | C19 | C21 | 109.4(7) |
| C22 | C19 | C20 | 105.9(7) |
| C21 | C19 | C20 | 106.9(7) |
| C42 | C47 | C49 | 111.8(7) |
| C42 | C47 | C48 | 109.9(7) |
| C42 | C47 | C50 | 110.0(7) |

|     |     |     |          |
|-----|-----|-----|----------|
| C49 | C47 | C48 | 111.8(7) |
| C49 | C47 | C50 | 107.7(7) |
| C48 | C47 | C50 | 105.5(7) |
| C23 | C28 | C33 | 122.4(7) |
| C23 | C28 | C27 | 114.2(7) |
| C33 | C28 | C27 | 123.3(8) |
| C13 | C12 | C11 | 119.2(9) |
| S1  | C1  | O1  | 125.5(6) |
| S1  | C1  | C2  | 118.2(6) |
| O1  | C1  | C2  | 116.3(7) |
| C14 | C13 | C12 | 121.6(8) |
| C10 | C11 | C12 | 121.8(9) |
| C28 | C27 | C26 | 125.3(9) |
| C24 | C25 | C26 | 122.4(8) |
| C27 | C26 | C25 | 118.4(9) |



**Table S13:** All non-hydrogen bond distances (Å) of **4Nd**.

| <b>Atom 1</b> | <b>Atom 2</b> | <b>Distance</b> |
|---------------|---------------|-----------------|
| Pt(1)         | V(1)          | 2.7605(5)       |
| Pt(1)         | S(1)          | 2.3245(9)       |
| Pt(1)         | S(3)          | 2.3131(10)      |
| Pt(1)         | S(4)          | 2.3222(9)       |
| Pt(1)         | S(2)          | 2.3184(9)       |
| Pt(2)         | V(2)          | 2.7861(6)       |
| Pt(2)         | S(6')         | 2.320(2)        |
| Pt(2)         | S(5')         | 2.275(2)        |
| Pt(2)         | S(6)          | 2.331(2)        |
| Pt(2)         | S(7')         | 2.372(2)        |
| Pt(2)         | S(5)          | 2.378(3)        |
| Pt(2)         | S(7)          | 2.258(3)        |
| Pt(2)         | S(8')         | 2.317(3)        |
| Pt(2)         | S(8)          | 2.311(4)        |
| Nd(2)         | O(16)         | 2.144(2)        |
| Nd(2)         | O(13)         | 2.477(2)        |
| Nd(2)         | O(14)         | 2.185(2)        |
| Nd(2)         | O(15)         | 2.183(2)        |
| Nd(1)         | O(6)          | 2.142(2)        |
| Nd(1)         | O(5)          | 2.470(2)        |
| Nd(1)         | O(8)          | 2.177(3)        |
| Nd(1)         | O(7)          | 2.185(2)        |
| V(1)          | O(1)          | 1.971(2)        |
| V(1)          | O(2)          | 1.987(2)        |
| V(1)          | O(5)          | 1.629(2)        |
| V(1)          | O(4)          | 1.984(2)        |
| V(1)          | O(3)          | 1.981(2)        |

|        |        |          |
|--------|--------|----------|
| V(2)   | O(13)  | 1.630(2) |
| V(2)   | O(11)  | 1.962(3) |
| V(2)   | O(12)  | 1.962(3) |
| V(2)   | O(9)   | 2.046(9) |
| V(2)   | O(9')  | 1.920(8) |
| V(2)   | O(10') | 2.005(6) |
| V(2)   | O(10)  | 1.969(7) |
| S(1)   | C(1)   | 1.708(3) |
| S(3)   | C(15)  | 1.704(3) |
| S(4)   | C(22)  | 1.708(3) |
| S(2)   | C(8)   | 1.709(3) |
| O(6)   | C(29)  | 1.312(4) |
| O(16)  | C(113) | 1.347(4) |
| O(1)   | C(1)   | 1.263(4) |
| O(2)   | C(8)   | 1.260(4) |
| O(4)   | C(22)  | 1.272(4) |
| O(8)   | C(57)  | 1.353(4) |
| O(7)   | C(43)  | 1.355(4) |
| O(14)  | C(127) | 1.349(4) |
| O(11)  | C(92)  | 1.238(4) |
| O(15)  | C(99)  | 1.346(4) |
| O(3)   | C(15)  | 1.270(4) |
| C(118) | C(113) | 1.418(5) |
| C(118) | C(123) | 1.553(5) |
| C(118) | C(117) | 1.401(5) |
| C(122) | C(119) | 1.536(5) |
| C(44)  | C(43)  | 1.422(4) |
| C(44)  | C(45)  | 1.388(5) |
| C(44)  | C(49)  | 1.538(4) |

|        |        |          |
|--------|--------|----------|
| C(34)  | C(29)  | 1.421(5) |
| C(34)  | C(39)  | 1.517(6) |
| C(34)  | C(33)  | 1.416(6) |
| C(113) | C(114) | 1.428(5) |
| C(29)  | C(30)  | 1.428(6) |
| C(7)   | C(2)   | 1.398(5) |
| C(7)   | C(6)   | 1.372(5) |
| C(75)  | C(76)  | 1.375(6) |
| C(75)  | C(74)  | 1.384(6) |
| O(12)  | C(71)  | 1.256(4) |
| C(79)  | C(78)  | 1.468(5) |
| C(79)  | C(84)  | 1.398(5) |
| C(79)  | C(80)  | 1.386(5) |
| C(48)  | C(43)  | 1.430(4) |
| C(48)  | C(47)  | 1.388(5) |
| C(48)  | C(53)  | 1.548(5) |
| C(128) | C(129) | 1.396(5) |
| C(128) | C(127) | 1.426(5) |
| C(128) | C(133) | 1.534(5) |
| C(129) | C(130) | 1.384(5) |
| C(62)  | C(61)  | 1.386(5) |
| C(62)  | C(57)  | 1.422(5) |
| C(62)  | C(67)  | 1.536(5) |
| C(39)  | C(42)  | 1.541(5) |
| C(39)  | C(40)  | 1.528(6) |
| C(39)  | C(41)  | 1.559(6) |
| C(155) | C(160) | 1.372(6) |
| C(155) | C(156) | 1.384(6) |
| C(85)  | C(86)  | 1.480(5) |

|        |        |          |
|--------|--------|----------|
| C(85)  | S(8')  | 1.708(4) |
| C(85)  | S(8)   | 1.656(5) |
| C(85)  | O(10') | 1.271(6) |
| C(85)  | O(10)  | 1.304(7) |
| C(92)  | C(93)  | 1.483(5) |
| C(92)  | S(7')  | 1.697(4) |
| C(92)  | S(7)   | 1.715(4) |
| C(78)  | S(5')  | 1.735(4) |
| C(78)  | S(5)   | 1.656(4) |
| C(78)  | O(9)   | 1.259(9) |
| C(78)  | O(9')  | 1.292(8) |
| C(114) | C(119) | 1.542(5) |
| C(114) | C(115) | 1.384(5) |
| C(1)   | C(2)   | 1.482(5) |
| C(17)  | C(16)  | 1.386(5) |
| C(17)  | C(18)  | 1.377(6) |
| C(130) | C(131) | 1.377(5) |
| C(16)  | C(21)  | 1.394(5) |
| C(16)  | C(15)  | 1.479(5) |
| C(142) | C(141) | 1.382(6) |
| C(142) | C(143) | 1.399(7) |
| C(126) | C(123) | 1.533(5) |
| C(93)  | C(98)  | 1.391(5) |
| C(93)  | C(94)  | 1.387(5) |
| C(138) | C(137) | 1.536(5) |
| C(127) | C(132) | 1.423(5) |
| C(9)   | C(8)   | 1.491(5) |
| C(9)   | C(14)  | 1.392(5) |
| C(9)   | C(10)  | 1.399(5) |

|        |        |          |
|--------|--------|----------|
| C(4)   | C(3)   | 1.383(5) |
| C(4)   | C(5)   | 1.388(5) |
| C(160) | C(159) | 1.381(6) |
| C(160) | C(161) | 1.505(6) |
| C(47)  | C(46)  | 1.384(5) |
| C(133) | C(136) | 1.534(5) |
| C(133) | C(134) | 1.555(5) |
| C(102) | C(101) | 1.383(5) |
| C(102) | C(103) | 1.383(5) |
| C(53)  | C(55)  | 1.539(5) |
| C(53)  | C(56)  | 1.533(5) |
| C(53)  | C(54)  | 1.539(5) |
| C(52)  | C(49)  | 1.546(5) |
| C(88)  | C(87)  | 1.379(5) |
| C(88)  | C(89)  | 1.387(5) |
| C(101) | C(100) | 1.393(5) |
| C(99)  | C(100) | 1.427(5) |
| C(99)  | C(104) | 1.432(5) |
| C(87)  | C(86)  | 1.397(5) |
| C(3)   | C(2)   | 1.395(5) |
| C(22)  | C(23)  | 1.475(5) |
| C(100) | C(105) | 1.536(5) |
| C(98)  | C(97)  | 1.387(5) |
| C(86)  | C(91)  | 1.388(5) |
| C(23)  | C(28)  | 1.400(5) |
| C(23)  | C(24)  | 1.389(5) |
| C(103) | C(104) | 1.389(5) |
| C(131) | C(132) | 1.401(5) |
| C(19)  | C(18)  | 1.369(6) |

|        |        |          |
|--------|--------|----------|
| C(19)  | C(20)  | 1.379(6) |
| C(72)  | C(73)  | 1.398(5) |
| C(72)  | C(77)  | 1.394(5) |
| C(72)  | C(71)  | 1.479(5) |
| C(28)  | C(27)  | 1.385(5) |
| C(125) | C(123) | 1.541(5) |
| C(76)  | C(77)  | 1.374(6) |
| C(70)  | C(67)  | 1.550(5) |
| C(159) | C(158) | 1.386(6) |
| C(111) | C(109) | 1.547(5) |
| C(123) | C(124) | 1.543(5) |
| C(45)  | C(46)  | 1.385(5) |
| C(14)  | C(13)  | 1.389(5) |
| C(49)  | C(50)  | 1.538(5) |
| C(49)  | C(51)  | 1.531(5) |
| C(6)   | C(5)   | 1.384(5) |
| C(119) | C(121) | 1.543(5) |
| C(119) | C(120) | 1.541(5) |
| C(61)  | C(60)  | 1.384(5) |
| C(60)  | C(59)  | 1.375(6) |
| C(141) | C(146) | 1.385(6) |
| C(115) | C(116) | 1.377(5) |
| C(112) | C(109) | 1.529(5) |
| C(139) | C(137) | 1.529(5) |
| C(57)  | C(58)  | 1.426(5) |
| C(104) | C(109) | 1.539(5) |
| C(67)  | C(68)  | 1.534(5) |
| C(67)  | C(69)  | 1.550(5) |
| C(35)  | C(37)  | 1.507(6) |

|        |        |          |
|--------|--------|----------|
| C(35)  | C(38)  | 1.532(6) |
| C(35)  | C(30)  | 1.535(6) |
| C(35)  | C(36)  | 1.572(7) |
| C(145) | C(146) | 1.384(6) |
| C(145) | C(144) | 1.365(6) |
| C(132) | C(137) | 1.542(5) |
| C(97)  | C(96)  | 1.374(5) |
| C(20)  | C(21)  | 1.381(5) |
| C(109) | C(110) | 1.541(5) |
| C(27)  | C(26)  | 1.386(6) |
| C(58)  | C(59)  | 1.387(6) |
| C(58)  | C(63)  | 1.541(6) |
| C(108) | C(105) | 1.540(5) |
| C(24)  | C(25)  | 1.384(5) |
| C(84)  | C(83)  | 1.385(5) |
| C(65)  | C(63)  | 1.513(5) |
| C(74)  | C(73)  | 1.374(5) |
| C(105) | C(107) | 1.532(5) |
| C(105) | C(106) | 1.552(5) |
| C(140) | C(137) | 1.538(5) |
| C(13)  | C(12)  | 1.387(6) |
| C(157) | C(158) | 1.390(6) |
| C(157) | C(156) | 1.372(6) |
| C(96)  | C(95)  | 1.374(6) |
| C(116) | C(117) | 1.375(6) |
| C(63)  | C(64)  | 1.493(6) |
| C(63)  | C(66)  | 1.573(6) |
| C(83)  | C(82)  | 1.381(7) |
| C(146) | C(147) | 1.512(6) |

|        |        |          |
|--------|--------|----------|
| C(26)  | C(25)  | 1.375(6) |
| C(12)  | C(11)  | 1.378(6) |
| C(82)  | C(81)  | 1.375(7) |
| C(152) | C(153) | 1.388(6) |
| C(152) | C(151) | 1.378(6) |
| C(91)  | C(90)  | 1.382(5) |
| C(150) | C(149) | 1.371(7) |
| C(150) | C(151) | 1.407(7) |
| C(10)  | C(11)  | 1.394(6) |
| C(94)  | C(95)  | 1.383(6) |
| C(154) | C(153) | 1.497(6) |
| C(149) | C(148) | 1.361(7) |
| C(90)  | C(89)  | 1.387(5) |
| C(32)  | C(33)  | 1.383(7) |
| C(32)  | C(31)  | 1.381(6) |
| C(80)  | C(81)  | 1.384(6) |
| C(31)  | C(30)  | 1.402(6) |
| C(153) | C(148) | 1.376(6) |
| C(71)  | S(6')  | 1.711(4) |
| C(71)  | S(6)   | 1.709(4) |
| C(144) | C(143) | 1.375(7) |



**Table S14:** All non-hydrogen bond angles ( $^{\circ}$ ) of **4Nd**.

| <b>Atom 1</b> | <b>Atom 2</b> | <b>Atom 3</b> | <b>Angle</b> |
|---------------|---------------|---------------|--------------|
| S(1)          | Pt(1)         | V(1)          | 90.27(2)     |
| S(3)          | Pt(1)         | V(1)          | 90.42(2)     |
| S(3)          | Pt(1)         | S(1)          | 179.21(3)    |
| S(3)          | Pt(1)         | S(4)          | 90.99(3)     |
| S(3)          | Pt(1)         | S(2)          | 90.81(4)     |
| S(4)          | Pt(1)         | V(1)          | 90.53(2)     |
| S(4)          | Pt(1)         | S(1)          | 88.61(3)     |
| S(2)          | Pt(1)         | V(1)          | 90.52(2)     |
| S(2)          | Pt(1)         | S(1)          | 89.58(3)     |
| S(2)          | Pt(1)         | S(4)          | 177.91(3)    |
| S(6')         | Pt(2)         | V(2)          | 90.38(4)     |
| S(6')         | Pt(2)         | S(7')         | 90.06(8)     |
| S(5')         | Pt(2)         | V(2)          | 89.96(5)     |
| S(5')         | Pt(2)         | S(6')         | 92.48(8)     |
| S(5')         | Pt(2)         | S(7')         | 177.36(8)    |
| S(5')         | Pt(2)         | S(8')         | 89.31(8)     |
| S(6)          | Pt(2)         | V(2)          | 90.92(5)     |
| S(6)          | Pt(2)         | S(5)          | 89.04(10)    |
| S(7')         | Pt(2)         | V(2)          | 90.77(5)     |
| S(5)          | Pt(2)         | V(2)          | 90.49(6)     |
| S(7)          | Pt(2)         | V(2)          | 90.27(7)     |
| S(7)          | Pt(2)         | S(6)          | 93.04(11)    |
| S(7)          | Pt(2)         | S(5)          | 177.77(10)   |
| S(7)          | Pt(2)         | S(8)          | 91.18(11)    |
| S(8')         | Pt(2)         | V(2)          | 91.15(7)     |
| S(8')         | Pt(2)         | S(6')         | 177.65(8)    |
| S(8')         | Pt(2)         | S(7')         | 88.13(8)     |

|       |       |       |            |
|-------|-------|-------|------------|
| S(8)  | Pt(2) | V(2)  | 89.51(8)   |
| S(8)  | Pt(2) | S(6)  | 175.76(10) |
| S(8)  | Pt(2) | S(5)  | 86.73(10)  |
| O(16) | Nd(2) | O(13) | 112.16(8)  |
| O(16) | Nd(2) | O(14) | 109.22(9)  |
| O(16) | Nd(2) | O(15) | 100.77(9)  |
| O(14) | Nd(2) | O(13) | 88.62(8)   |
| O(15) | Nd(2) | O(13) | 114.73(8)  |
| O(15) | Nd(2) | O(14) | 131.19(9)  |
| O(6)  | Nd(1) | O(5)  | 112.41(8)  |
| O(6)  | Nd(1) | O(8)  | 109.63(9)  |
| O(6)  | Nd(1) | O(7)  | 100.77(9)  |
| O(8)  | Nd(1) | O(5)  | 89.26(8)   |
| O(8)  | Nd(1) | O(7)  | 131.57(9)  |
| O(7)  | Nd(1) | O(5)  | 113.10(8)  |
| O(1)  | V(1)  | Pt(1) | 82.33(6)   |
| O(1)  | V(1)  | O(2)  | 89.13(10)  |
| O(1)  | V(1)  | O(4)  | 85.06(10)  |
| O(1)  | V(1)  | O(3)  | 164.34(9)  |
| O(2)  | V(1)  | Pt(1) | 82.18(6)   |
| O(5)  | V(1)  | Pt(1) | 179.37(9)  |
| O(5)  | V(1)  | O(1)  | 98.24(10)  |
| O(5)  | V(1)  | O(2)  | 97.55(10)  |
| O(5)  | V(1)  | O(4)  | 98.84(10)  |
| O(5)  | V(1)  | O(3)  | 97.35(11)  |
| O(4)  | V(1)  | Pt(1) | 81.47(6)   |
| O(4)  | V(1)  | O(2)  | 163.24(9)  |
| O(3)  | V(1)  | Pt(1) | 82.09(7)   |
| O(3)  | V(1)  | O(2)  | 90.27(10)  |

|        |      |        |            |
|--------|------|--------|------------|
| O(3)   | V(1) | O(4)   | 91.11(10)  |
| O(13)  | V(2) | Pt(2)  | 178.99(9)  |
| O(13)  | V(2) | O(11)  | 97.04(11)  |
| O(13)  | V(2) | O(12)  | 97.87(11)  |
| O(13)  | V(2) | O(9)   | 97.9(3)    |
| O(13)  | V(2) | O(9')  | 99.9(2)    |
| O(13)  | V(2) | O(10') | 99.04(16)  |
| O(13)  | V(2) | O(10)  | 97.9(2)    |
| O(11)  | V(2) | Pt(2)  | 81.98(7)   |
| O(11)  | V(2) | O(12)  | 90.27(14)  |
| O(11)  | V(2) | O(9)   | 163.9(3)   |
| O(11)  | V(2) | O(10') | 80.66(19)  |
| O(11)  | V(2) | O(10)  | 101.4(2)   |
| O(12)  | V(2) | Pt(2)  | 81.91(7)   |
| O(12)  | V(2) | O(9)   | 81.8(2)    |
| O(12)  | V(2) | O(10') | 161.65(17) |
| O(12)  | V(2) | O(10)  | 159.1(2)   |
| O(9)   | V(2) | Pt(2)  | 83.0(2)    |
| O(9')  | V(2) | Pt(2)  | 81.1(2)    |
| O(9')  | V(2) | O(11)  | 159.4(2)   |
| O(9')  | V(2) | O(12)  | 98.9(2)    |
| O(9')  | V(2) | O(10') | 85.2(2)    |
| O(10') | V(2) | Pt(2)  | 81.06(14)  |
| O(10)  | V(2) | Pt(2)  | 82.60(18)  |
| O(10)  | V(2) | O(9)   | 82.5(3)    |
| C(1)   | S(1) | Pt(1)  | 103.09(12) |
| C(15)  | S(3) | Pt(1)  | 103.04(13) |
| C(22)  | S(4) | Pt(1)  | 101.88(12) |
| C(8)   | S(2) | Pt(1)  | 102.91(12) |

|        |        |        |            |
|--------|--------|--------|------------|
| C(29)  | O(6)   | Nd(1)  | 178.3(3)   |
| C(113) | O(16)  | Nd(2)  | 177.5(2)   |
| C(1)   | O(1)   | V(1)   | 133.9(2)   |
| C(8)   | O(2)   | V(1)   | 132.5(2)   |
| V(2)   | O(13)  | Nd(2)  | 173.62(14) |
| V(1)   | O(5)   | Nd(1)  | 174.17(13) |
| C(22)  | O(4)   | V(1)   | 135.3(2)   |
| C(57)  | O(8)   | Nd(1)  | 167.5(2)   |
| C(43)  | O(7)   | Nd(1)  | 168.1(2)   |
| C(127) | O(14)  | Nd(2)  | 166.0(2)   |
| C(92)  | O(11)  | V(2)   | 138.3(2)   |
| C(99)  | O(15)  | Nd(2)  | 167.5(2)   |
| C(15)  | O(3)   | V(1)   | 133.6(2)   |
| C(113) | C(118) | C(123) | 127.4(3)   |
| C(117) | C(118) | C(113) | 117.6(3)   |
| C(117) | C(118) | C(123) | 115.0(3)   |
| C(43)  | C(44)  | C(49)  | 121.3(3)   |
| C(45)  | C(44)  | C(43)  | 118.9(3)   |
| C(45)  | C(44)  | C(49)  | 119.8(3)   |
| C(29)  | C(34)  | C(39)  | 128.0(4)   |
| C(33)  | C(34)  | C(29)  | 117.6(4)   |
| C(33)  | C(34)  | C(39)  | 114.4(4)   |
| O(16)  | C(113) | C(118) | 121.4(3)   |
| O(16)  | C(113) | C(114) | 118.5(3)   |
| C(118) | C(113) | C(114) | 120.1(3)   |
| O(6)   | C(29)  | C(34)  | 121.2(4)   |
| O(6)   | C(29)  | C(30)  | 118.5(3)   |
| C(34)  | C(29)  | C(30)  | 120.0(4)   |
| C(6)   | C(7)   | C(2)   | 120.3(3)   |

|        |        |        |          |
|--------|--------|--------|----------|
| C(76)  | C(75)  | C(74)  | 119.9(4) |
| C(71)  | O(12)  | V(2)   | 139.0(2) |
| C(84)  | C(79)  | C(78)  | 117.3(3) |
| C(80)  | C(79)  | C(78)  | 122.9(4) |
| C(80)  | C(79)  | C(84)  | 119.7(4) |
| C(43)  | C(48)  | C(53)  | 121.5(3) |
| C(47)  | C(48)  | C(43)  | 118.1(3) |
| C(47)  | C(48)  | C(53)  | 120.3(3) |
| C(129) | C(128) | C(127) | 118.9(3) |
| C(129) | C(128) | C(133) | 119.8(3) |
| C(127) | C(128) | C(133) | 121.2(3) |
| C(130) | C(129) | C(128) | 121.3(4) |
| C(61)  | C(62)  | C(57)  | 118.6(4) |
| C(61)  | C(62)  | C(67)  | 120.4(3) |
| C(57)  | C(62)  | C(67)  | 121.0(3) |
| C(34)  | C(39)  | C(42)  | 117.4(3) |
| C(34)  | C(39)  | C(40)  | 111.5(4) |
| C(34)  | C(39)  | C(41)  | 107.9(4) |
| C(42)  | C(39)  | C(41)  | 104.4(3) |
| C(40)  | C(39)  | C(42)  | 107.7(3) |
| C(40)  | C(39)  | C(41)  | 107.3(3) |
| C(160) | C(155) | C(156) | 122.2(4) |
| C(86)  | C(85)  | S(8')  | 118.5(3) |
| C(86)  | C(85)  | S(8)   | 120.7(3) |
| O(10') | C(85)  | C(86)  | 118.0(4) |
| O(10') | C(85)  | S(8')  | 123.1(4) |
| O(10)  | C(85)  | C(86)  | 115.1(4) |
| O(10)  | C(85)  | S(8)   | 123.7(4) |
| O(11)  | C(92)  | C(93)  | 117.3(3) |

|        |        |        |          |
|--------|--------|--------|----------|
| O(11)  | C(92)  | S(7')  | 125.2(3) |
| O(11)  | C(92)  | S(7)   | 118.6(3) |
| C(93)  | C(92)  | S(7')  | 116.1(3) |
| C(93)  | C(92)  | S(7)   | 122.8(3) |
| O(7)   | C(43)  | C(44)  | 119.9(3) |
| O(7)   | C(43)  | C(48)  | 120.5(3) |
| C(44)  | C(43)  | C(48)  | 119.7(3) |
| C(79)  | C(78)  | S(5')  | 123.0(3) |
| C(79)  | C(78)  | S(5)   | 114.6(3) |
| O(9)   | C(78)  | C(79)  | 116.6(5) |
| O(9)   | C(78)  | S(5)   | 128.7(5) |
| O(9')  | C(78)  | C(79)  | 117.0(4) |
| O(9')  | C(78)  | S(5')  | 119.6(4) |
| C(113) | C(114) | C(119) | 121.6(3) |
| C(115) | C(114) | C(113) | 118.3(3) |
| C(115) | C(114) | C(119) | 120.1(3) |
| O(1)   | C(1)   | S(1)   | 123.4(3) |
| O(1)   | C(1)   | C(2)   | 117.1(3) |
| C(2)   | C(1)   | S(1)   | 119.4(2) |
| C(18)  | C(17)  | C(16)  | 120.4(4) |
| C(131) | C(130) | C(129) | 119.5(4) |
| C(17)  | C(16)  | C(21)  | 118.4(3) |
| C(17)  | C(16)  | C(15)  | 123.0(3) |
| C(21)  | C(16)  | C(15)  | 118.6(3) |
| C(141) | C(142) | C(143) | 119.8(4) |
| C(98)  | C(93)  | C(92)  | 118.8(3) |
| C(94)  | C(93)  | C(92)  | 122.4(3) |
| C(94)  | C(93)  | C(98)  | 118.7(3) |
| O(14)  | C(127) | C(128) | 119.7(3) |

|        |        |        |          |
|--------|--------|--------|----------|
| O(14)  | C(127) | C(132) | 120.3(3) |
| C(132) | C(127) | C(128) | 120.0(3) |
| C(14)  | C(9)   | C(8)   | 118.7(3) |
| C(14)  | C(9)   | C(10)  | 119.1(3) |
| C(10)  | C(9)   | C(8)   | 121.9(3) |
| C(3)   | C(4)   | C(5)   | 120.0(3) |
| C(155) | C(160) | C(159) | 118.3(4) |
| C(155) | C(160) | C(161) | 121.8(4) |
| C(159) | C(160) | C(161) | 120.0(4) |
| C(46)  | C(47)  | C(48)  | 122.4(3) |
| C(128) | C(133) | C(135) | 109.0(3) |
| C(128) | C(133) | C(134) | 110.6(3) |
| C(135) | C(133) | C(134) | 112.0(3) |
| C(136) | C(133) | C(128) | 113.1(3) |
| C(136) | C(133) | C(135) | 106.2(3) |
| C(136) | C(133) | C(134) | 106.0(3) |
| C(101) | C(102) | C(103) | 118.9(4) |
| C(55)  | C(53)  | C(48)  | 111.2(3) |
| C(55)  | C(53)  | C(54)  | 110.2(3) |
| C(56)  | C(53)  | C(48)  | 111.6(3) |
| C(56)  | C(53)  | C(55)  | 107.2(3) |
| C(56)  | C(53)  | C(54)  | 106.2(3) |
| C(54)  | C(53)  | C(48)  | 110.2(3) |
| C(87)  | C(88)  | C(89)  | 119.9(3) |
| C(102) | C(101) | C(100) | 122.1(3) |
| O(15)  | C(99)  | C(100) | 119.8(3) |
| O(15)  | C(99)  | C(104) | 120.5(3) |
| C(100) | C(99)  | C(104) | 119.6(3) |
| C(88)  | C(87)  | C(86)  | 120.2(3) |

|        |        |        |          |
|--------|--------|--------|----------|
| O(2)   | C(8)   | S(2)   | 124.0(3) |
| O(2)   | C(8)   | C(9)   | 118.0(3) |
| C(9)   | C(8)   | S(2)   | 117.9(3) |
| C(4)   | C(3)   | C(2)   | 119.7(3) |
| O(4)   | C(22)  | S(4)   | 123.1(3) |
| O(4)   | C(22)  | C(23)  | 117.6(3) |
| C(23)  | C(22)  | S(4)   | 119.2(2) |
| C(101) | C(100) | C(99)  | 118.5(3) |
| C(101) | C(100) | C(105) | 120.9(3) |
| C(99)  | C(100) | C(105) | 120.6(3) |
| C(97)  | C(98)  | C(93)  | 120.6(3) |
| C(87)  | C(86)  | C(85)  | 122.4(3) |
| C(91)  | C(86)  | C(85)  | 118.1(3) |
| C(91)  | C(86)  | C(87)  | 119.4(3) |
| C(28)  | C(23)  | C(22)  | 118.7(3) |
| C(24)  | C(23)  | C(22)  | 121.7(3) |
| C(24)  | C(23)  | C(28)  | 119.7(3) |
| C(102) | C(103) | C(104) | 122.7(3) |
| C(130) | C(131) | C(132) | 122.6(4) |
| C(18)  | C(19)  | C(20)  | 119.4(4) |
| C(73)  | C(72)  | C(71)  | 118.7(3) |
| C(77)  | C(72)  | C(73)  | 119.0(4) |
| C(77)  | C(72)  | C(71)  | 122.3(3) |
| C(27)  | C(28)  | C(23)  | 119.7(3) |
| C(77)  | C(76)  | C(75)  | 120.6(4) |
| C(160) | C(159) | C(158) | 120.4(4) |
| C(126) | C(123) | C(118) | 116.6(3) |
| C(126) | C(123) | C(125) | 106.2(3) |
| C(126) | C(123) | C(124) | 107.4(3) |



|        |        |        |          |
|--------|--------|--------|----------|
| C(125) | C(123) | C(118) | 108.2(3) |
| C(125) | C(123) | C(124) | 108.8(3) |
| C(124) | C(123) | C(118) | 109.3(3) |
| C(46)  | C(45)  | C(44)  | 121.8(3) |
| C(7)   | C(2)   | C(1)   | 122.6(3) |
| C(3)   | C(2)   | C(7)   | 119.6(3) |
| C(3)   | C(2)   | C(1)   | 117.7(3) |
| C(13)  | C(14)  | C(9)   | 120.0(4) |
| C(44)  | C(49)  | C(52)  | 108.9(3) |
| C(44)  | C(49)  | C(50)  | 112.6(3) |
| C(50)  | C(49)  | C(52)  | 106.5(3) |
| C(51)  | C(49)  | C(44)  | 110.3(3) |
| C(51)  | C(49)  | C(52)  | 112.5(3) |
| C(51)  | C(49)  | C(50)  | 106.1(3) |
| C(7)   | C(6)   | C(5)   | 119.9(4) |
| C(122) | C(119) | C(114) | 110.1(3) |
| C(122) | C(119) | C(121) | 111.4(3) |
| C(122) | C(119) | C(120) | 106.9(3) |
| C(114) | C(119) | C(121) | 110.7(3) |
| C(120) | C(119) | C(114) | 112.2(3) |
| C(120) | C(119) | C(121) | 105.5(3) |
| C(60)  | C(61)  | C(62)  | 121.8(4) |
| C(59)  | C(60)  | C(61)  | 119.2(4) |
| C(142) | C(141) | C(146) | 120.9(4) |
| C(116) | C(115) | C(114) | 122.3(4) |
| O(8)   | C(57)  | C(62)  | 119.3(3) |
| O(8)   | C(57)  | C(58)  | 120.7(3) |
| C(62)  | C(57)  | C(58)  | 120.0(3) |
| C(99)  | C(104) | C(109) | 121.5(3) |

|        |        |        |          |
|--------|--------|--------|----------|
| C(103) | C(104) | C(99)  | 118.0(3) |
| C(103) | C(104) | C(109) | 120.4(3) |
| C(19)  | C(18)  | C(17)  | 121.0(4) |
| C(62)  | C(67)  | C(70)  | 109.3(3) |
| C(62)  | C(67)  | C(69)  | 110.6(3) |
| C(68)  | C(67)  | C(62)  | 113.0(3) |
| C(68)  | C(67)  | C(70)  | 106.5(3) |
| C(68)  | C(67)  | C(69)  | 106.1(3) |
| C(69)  | C(67)  | C(70)  | 111.3(3) |
| C(37)  | C(35)  | C(38)  | 108.7(4) |
| C(37)  | C(35)  | C(30)  | 112.6(4) |
| C(37)  | C(35)  | C(36)  | 108.9(4) |
| C(38)  | C(35)  | C(30)  | 112.9(4) |
| C(38)  | C(35)  | C(36)  | 104.0(4) |
| C(30)  | C(35)  | C(36)  | 109.3(4) |
| C(144) | C(145) | C(146) | 121.8(4) |
| C(47)  | C(46)  | C(45)  | 119.1(3) |
| C(127) | C(132) | C(137) | 123.1(3) |
| C(131) | C(132) | C(127) | 117.6(3) |
| C(131) | C(132) | C(137) | 119.2(3) |
| C(96)  | C(97)  | C(98)  | 119.8(4) |
| C(19)  | C(20)  | C(21)  | 120.2(4) |
| C(112) | C(109) | C(111) | 110.3(3) |
| C(112) | C(109) | C(104) | 110.8(3) |
| C(112) | C(109) | C(110) | 106.3(3) |
| C(104) | C(109) | C(111) | 110.6(3) |
| C(104) | C(109) | C(110) | 111.7(3) |
| C(110) | C(109) | C(111) | 107.0(3) |
| C(28)  | C(27)  | C(26)  | 119.8(4) |

|        |        |        |          |
|--------|--------|--------|----------|
| C(57)  | C(58)  | C(63)  | 122.6(4) |
| C(59)  | C(58)  | C(57)  | 117.9(4) |
| C(59)  | C(58)  | C(63)  | 119.5(4) |
| C(60)  | C(59)  | C(58)  | 122.5(4) |
| C(25)  | C(24)  | C(23)  | 120.1(4) |
| C(83)  | C(84)  | C(79)  | 119.9(4) |
| C(73)  | C(74)  | C(75)  | 120.2(4) |
| C(100) | C(105) | C(108) | 110.4(3) |
| C(100) | C(105) | C(106) | 112.3(3) |
| C(108) | C(105) | C(106) | 106.4(3) |
| C(107) | C(105) | C(100) | 109.4(3) |
| C(107) | C(105) | C(108) | 112.2(3) |
| C(107) | C(105) | C(106) | 106.0(3) |
| C(20)  | C(21)  | C(16)  | 120.5(4) |
| C(12)  | C(13)  | C(14)  | 120.4(4) |
| C(156) | C(157) | C(158) | 119.3(4) |
| C(95)  | C(96)  | C(97)  | 120.2(4) |
| C(159) | C(158) | C(157) | 120.5(4) |
| C(74)  | C(73)  | C(72)  | 120.2(4) |
| C(117) | C(116) | C(115) | 119.0(4) |
| C(58)  | C(63)  | C(66)  | 110.7(4) |
| C(65)  | C(63)  | C(58)  | 110.5(3) |
| C(65)  | C(63)  | C(66)  | 104.1(3) |
| C(64)  | C(63)  | C(58)  | 112.7(3) |
| C(64)  | C(63)  | C(65)  | 112.8(4) |
| C(64)  | C(63)  | C(66)  | 105.6(4) |
| C(116) | C(117) | C(118) | 122.6(4) |
| C(76)  | C(77)  | C(72)  | 120.1(4) |
| O(3)   | C(15)  | S(3)   | 123.6(3) |

|        |        |        |          |
|--------|--------|--------|----------|
| O(3)   | C(15)  | C(16)  | 117.9(3) |
| C(16)  | C(15)  | S(3)   | 118.5(3) |
| C(82)  | C(83)  | C(84)  | 119.9(4) |
| C(141) | C(146) | C(147) | 120.4(4) |
| C(145) | C(146) | C(141) | 118.0(4) |
| C(145) | C(146) | C(147) | 121.6(4) |
| C(25)  | C(26)  | C(27)  | 120.6(4) |
| C(6)   | C(5)   | C(4)   | 120.4(4) |
| C(11)  | C(12)  | C(13)  | 120.2(4) |
| C(157) | C(156) | C(155) | 119.4(4) |
| C(81)  | C(82)  | C(83)  | 120.1(4) |
| C(138) | C(137) | C(132) | 109.1(3) |
| C(138) | C(137) | C(140) | 106.4(3) |
| C(139) | C(137) | C(138) | 109.7(3) |
| C(139) | C(137) | C(132) | 112.8(3) |
| C(139) | C(137) | C(140) | 106.4(3) |
| C(140) | C(137) | C(132) | 112.3(3) |
| C(151) | C(152) | C(153) | 121.4(4) |
| C(90)  | C(91)  | C(86)  | 120.3(3) |
| C(149) | C(150) | C(151) | 118.4(5) |
| C(11)  | C(10)  | C(9)   | 120.4(4) |
| C(95)  | C(94)  | C(93)  | 120.3(4) |
| C(26)  | C(25)  | C(24)  | 120.1(4) |
| C(148) | C(149) | C(150) | 121.4(5) |
| C(91)  | C(90)  | C(89)  | 119.8(4) |
| C(31)  | C(32)  | C(33)  | 119.6(5) |
| C(32)  | C(33)  | C(34)  | 122.2(4) |
| C(81)  | C(80)  | C(79)  | 119.6(4) |
| C(32)  | C(31)  | C(30)  | 121.3(5) |

|        |        |        |            |
|--------|--------|--------|------------|
| C(29)  | C(30)  | C(35)  | 122.3(4)   |
| C(31)  | C(30)  | C(29)  | 119.0(4)   |
| C(31)  | C(30)  | C(35)  | 118.7(4)   |
| C(152) | C(153) | C(154) | 122.0(4)   |
| C(148) | C(153) | C(152) | 118.0(5)   |
| C(148) | C(153) | C(154) | 119.9(5)   |
| C(152) | C(151) | C(150) | 119.4(5)   |
| O(12)  | C(71)  | C(72)  | 118.2(3)   |
| O(12)  | C(71)  | S(6')  | 121.3(3)   |
| O(12)  | C(71)  | S(6)   | 121.0(3)   |
| C(72)  | C(71)  | S(6')  | 118.7(3)   |
| C(72)  | C(71)  | S(6)   | 118.6(3)   |
| C(12)  | C(11)  | C(10)  | 119.8(4)   |
| C(149) | C(148) | C(153) | 121.3(5)   |
| C(145) | C(144) | C(143) | 120.3(5)   |
| C(96)  | C(95)  | C(94)  | 120.3(4)   |
| C(88)  | C(89)  | C(90)  | 120.3(4)   |
| C(82)  | C(81)  | C(80)  | 120.8(4)   |
| C(144) | C(143) | C(142) | 119.1(5)   |
| C(71)  | S(6')  | Pt(2)  | 103.10(15) |
| C(78)  | S(5')  | Pt(2)  | 103.85(15) |
| C(71)  | S(6)   | Pt(2)  | 102.72(16) |
| C(92)  | S(7')  | Pt(2)  | 101.26(16) |
| C(78)  | S(5)   | Pt(2)  | 102.32(17) |
| C(92)  | S(7)   | Pt(2)  | 105.25(18) |
| C(78)  | O(9)   | V(2)   | 129.2(6)   |
| C(78)  | O(9')  | V(2)   | 137.8(5)   |
| C(85)  | S(8')  | Pt(2)  | 103.19(17) |
| C(85)  | S(8)   | Pt(2)  | 105.2(2)   |

|       |        |      |          |
|-------|--------|------|----------|
| C(85) | O(10') | V(2) | 132.0(4) |
| C(85) | O(10)  | V(2) | 132.5(5) |

1. H. A. Stecher, A. Sen and A. L. Rheingold, *Inorg. Chem.*, 1988, **27**, 1130-1132.
2. H. D. Amberger, H. Reddmann, C. Guttenberger, B. Unrecht, L. Zhang, C. Apostolidis, O. Walter and B. Kanellakopoulos, *Z. Anorg. Allg. Chem.*, 2003, **629**, 1522-1534.
3. S. A. Beach and L. H. Doerrer, *Acc. Chem. Res.*, 2018, DOI: 10.1021/acs.accounts.7b00585.
4. D. F. Evans, *J. Chem. Soc.*, 1959, 2003-2005.
5. S. K. Sur, *J. Magn. Reson.*, 1989, **82**, 169-173.
6. O. V. Dolomanov, L. J. Bourhis, R. J. Gildea, J. A. K. Howard and H. Puschmann, *J. Appl. Crystallogr.*, 2009, **42**, 339-341.
7. G. M. Sheldrick, *Acta Crystallogr., Sect. A: Found. Adv.*, 2015, **71**, 3-8.
8. G. Sheldrick, *Acta Crystallographica Section A*, 2008, **64**, 112-122.
9. G. A. Bain and J. F. Berry, *J. Chem. Educ.*, 2008, **85**, 532-536.
10. N. F. Chilton, R. P. Anderson, L. D. Turner, A. Soncini and K. S. Murray, *J. Comput. Chem.*, 2013, **34**, 1164-1175.
